# Supplementary material for: Reference values for body composition in healthy urban Mexican children and adolescents
Source: Springer Nature journal article supplement (doi:10.1038/s41430-023-01352-1), 2023-10-16

## Reference values of body composition for healthy urban Mexican children and adolescents. "Online Supplementary Material"

Figure 1. BMI distribution comparison by sex and year of age between our sample (red) with that reported in the 2018 Mexican National Health and Nutrition Survey (ENSANUT 2018) (blue).  
By T-student test

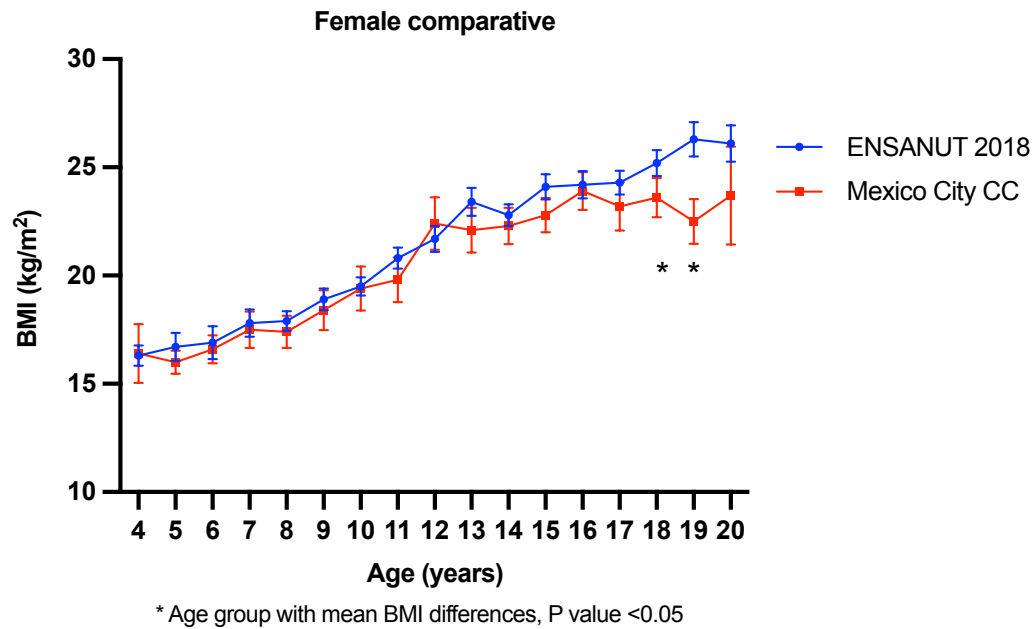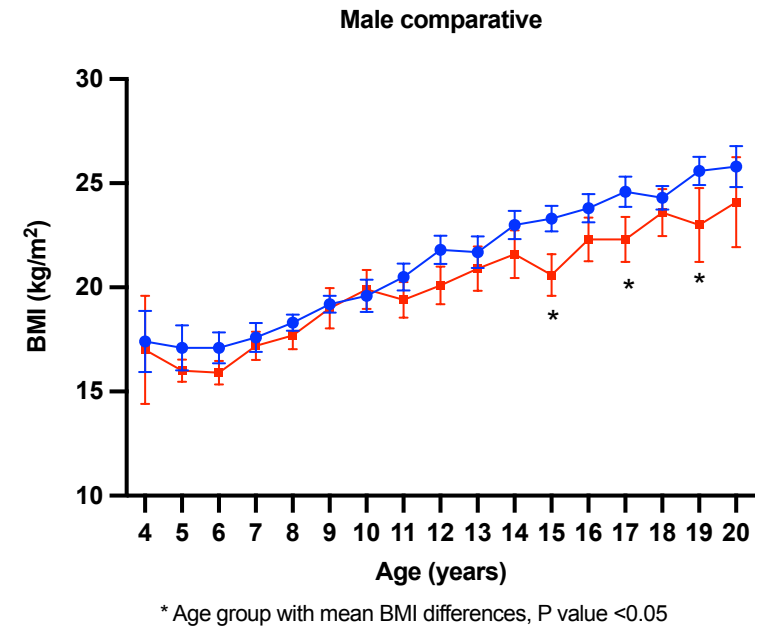

Figure 2. Participants flowchart.

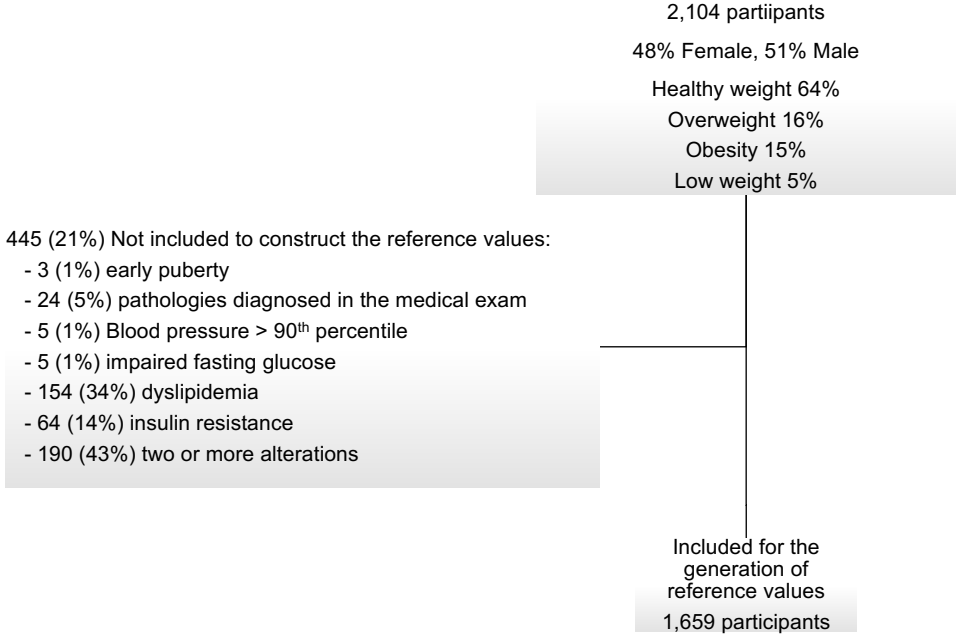

Supplementary table 1. Sample size by age and sex groups.

| Age group | Female (n) | Male (n) |
|-----------|------------|----------|
| 4         | 7          | 7        |
| 5         | 64         | 57       |
| 6         | 51         | 56       |
| 7         | 52         | 81       |
| 8         | 54         | 78       |
| 9         | 44         | 67       |
| 10        | 45         | 59       |
| 11        | 58         | 57       |
| 12        | 39         | 50       |
| 13        | 44         | 49       |
| 14        | 55         | 49       |
| 15        | 53         | 61       |
| 16        | 65         | 49       |
| 17        | 54         | 43       |
| 18        | 54         | 43       |
| 19        | 47         | 30       |
| 20        | 20         | 17       |

Body composition centiles values by age and gender for Mexican subjects (5 to 18 years).

Part 1. Anthropometry: raw values.

Supplementary Table 2. Smoothed percentiles for waist circumference according to WHO methodology, for female and male 5 to 18 years.

| Age (years) | Waist circumference (cm) (WHO methodology) |       |       |       |       |       |       |          |       |       |                                  |       |       |        |       |       |       |       |       |       |          |       |       |       |       |        |
|-------------|--------------------------------------------|-------|-------|-------|-------|-------|-------|----------|-------|-------|----------------------------------|-------|-------|--------|-------|-------|-------|-------|-------|-------|----------|-------|-------|-------|-------|--------|
|             | Female LMS parameters and centiles         |       |       |       |       |       |       |          |       |       | Male LMS parameters and centiles |       |       |        |       |       |       |       |       |       |          |       |       |       |       |        |
|             | L                                          | S     | 1th   | 3th   | 5th   | 15th  | 25th  | 50th (M) | 75th  | 85th  | 95th                             | 97th  | 99th  | L      | S     | 1th   | 3th   | 5th   | 15th  | 25th  | 50th (M) | 75th  | 85th  | 95th  | 97th  | 99th   |
| 5           | -2.976                                     | 0.079 | 43.87 | 44.92 | 45.52 | 47.21 | 48.35 | 50.8     | 53.83 | 55.79 | 59.86                            | 61.79 | 66.25 | -2.867 | 0.059 | 44.76 | 45.63 | 46.12 | 47.49 | 48.38 | 50.22    | 52.38 | 53.69 | 56.23 | 57.35 | 59.72  |
| 5.5         | -2.979                                     | 0.082 | 44.88 | 45.98 | 46.6  | 48.39 | 49.59 | 52.2     | 55.45 | 57.57 | 62.02                            | 64.16 | 69.18 | -2.826 | 0.064 | 45.73 | 46.68 | 47.21 | 48.71 | 49.7  | 51.76    | 54.18 | 55.68 | 58.61 | 59.92 | 62.72  |
| 6           | -2.976                                     | 0.085 | 45.65 | 46.79 | 47.45 | 49.32 | 50.58 | 53.34    | 56.8  | 59.08 | 63.91                            | 66.27 | 71.88 | -2.788 | 0.07  | 46.52 | 47.56 | 48.15 | 49.8  | 50.89 | 53.2     | 55.96 | 57.68 | 61.11 | 62.66 | 66.06  |
| 6.5         | -2.967                                     | 0.088 | 46.16 | 47.35 | 48.03 | 49.98 | 51.3  | 54.2     | 57.87 | 60.31 | 65.55                            | 68.14 | 74.41 | -2.753 | 0.078 | 47.13 | 48.27 | 48.91 | 50.74 | 51.96 | 54.56    | 57.73 | 59.75 | 63.84 | 65.75 | 70.01  |
| 7           | -2.949                                     | 0.092 | 46.5  | 47.73 | 48.44 | 50.47 | 51.85 | 54.89    | 58.79 | 61.39 | 67.07                            | 69.91 | 76.91 | -2.721 | 0.086 | 47.59 | 48.83 | 49.54 | 51.56 | 52.92 | 55.86    | 59.51 | 61.89 | 66.84 | 69.2  | 74.68  |
| 7.5         | -2.921                                     | 0.096 | 46.78 | 48.05 | 48.79 | 50.9  | 52.34 | 55.52    | 59.63 | 62.4  | 68.5                             | 71.6  | 79.34 | -2.691 | 0.095 | 47.99 | 49.33 | 50.1  | 52.31 | 53.81 | 57.1     | 61.26 | 64.03 | 69.96 | 72.88 | 79.91  |
| 8           | -2.881                                     | 0.099 | 47.12 | 48.43 | 49.19 | 51.38 | 52.87 | 56.19    | 60.5  | 63.42 | 69.91                            | 73.23 | 81.63 | -2.662 | 0.103 | 48.4  | 49.83 | 50.66 | 53.04 | 54.67 | 58.28    | 62.95 | 66.1  | 73.05 | 76.58 | 85.39  |
| 8.5         | -2.829                                     | 0.101 | 47.6  | 48.96 | 49.75 | 52.01 | 53.56 | 57.01    | 61.5  | 64.55 | 71.36                            | 74.86 | 83.76 | -2.636 | 0.111 | 48.82 | 50.34 | 51.21 | 53.75 | 55.5  | 59.42    | 64.56 | 68.1  | 76.09 | 80.26 | 91.04  |
| 9           | -2.767                                     | 0.103 | 48.26 | 49.67 | 50.48 | 52.82 | 54.43 | 58       | 62.65 | 65.81 | 72.86                            | 76.49 | 85.7  | -2.611 | 0.117 | 49.27 | 50.86 | 51.78 | 54.47 | 56.33 | 60.51    | 66.09 | 69.98 | 78.95 | 83.75 | 96.5   |
| 9.5         | -2.694                                     | 0.104 | 49.05 | 50.5  | 51.34 | 53.76 | 55.42 | 59.11    | 63.9  | 67.16 | 74.38                            | 78.08 | 87.42 | -2.587 | 0.121 | 49.82 | 51.47 | 52.42 | 55.22 | 57.17 | 61.57    | 67.48 | 71.65 | 81.38 | 86.66 | 100.97 |
| 10          | -2.608                                     | 0.105 | 49.9  | 51.41 | 52.27 | 54.78 | 56.49 | 60.29    | 65.2  | 68.52 | 75.84                            | 79.56 | 88.84 | -2.565 | 0.123 | 50.49 | 52.18 | 53.16 | 56.04 | 58.05 | 62.59    | 68.71 | 73.04 | 83.19 | 88.73 | 103.81 |
| 10.5        | -2.511                                     | 0.105 | 50.8  | 52.35 | 53.25 | 55.83 | 57.6  | 61.49    | 66.5  | 69.86 | 77.19                            | 80.87 | 89.91 | -2.544 | 0.123 | 51.27 | 52.99 | 54    | 56.93 | 58.97 | 63.58    | 69.8  | 74.18 | 84.42 | 89.98 | 105.08 |
| 11          | -2.405                                     | 0.105 | 51.76 | 53.36 | 54.29 | 56.95 | 58.76 | 62.74    | 67.81 | 71.19 | 78.47                            | 82.06 | 90.73 | -2.523 | 0.122 | 52.12 | 53.87 | 54.89 | 57.85 | 59.9  | 64.54    | 70.76 | 75.12 | 85.22 | 90.66 | 105.23 |
| 11.5        | -2.291                                     | 0.105 | 52.8  | 54.46 | 55.41 | 58.15 | 60    | 64.06    | 69.18 | 72.55 | 79.71                            | 83.19 | 91.41 | -2.504 | 0.12  | 53.02 | 54.79 | 55.81 | 58.78 | 60.84 | 65.48    | 71.64 | 75.93 | 85.76 | 90.98 | 104.75 |
| 12          | -2.171                                     | 0.104 | 53.91 | 55.63 | 56.61 | 59.42 | 61.32 | 65.43    | 70.58 | 73.94 | 80.94                            | 84.28 | 92.01 | -2.485 | 0.117 | 53.95 | 55.72 | 56.75 | 59.73 | 61.78 | 66.39    | 72.46 | 76.65 | 86.12 | 91.08 | 103.93 |
| 12.5        | -2.045                                     | 0.102 | 55.04 | 56.8  | 57.82 | 60.7  | 62.63 | 66.81    | 71.96 | 75.28 | 82.1                             | 85.3  | 92.54 | -2.468 | 0.114 | 54.89 | 56.67 | 57.7  | 60.67 | 62.72 | 67.27    | 73.23 | 77.29 | 86.37 | 91.04 | 102.91 |
| 13          | -1.915                                     | 0.101 | 56.11 | 57.94 | 58.97 | 61.92 | 63.89 | 68.11    | 73.26 | 76.53 | 83.15                            | 86.21 | 92.99 | -2.451 | 0.11  | 55.86 | 57.63 | 58.65 | 61.61 | 63.64 | 68.13    | 73.95 | 77.88 | 86.53 | 90.91 | 101.8  |
| 13.5        | -1.782                                     | 0.099 | 57.1  | 58.97 | 60.03 | 63.04 | 65.04 | 69.29    | 74.42 | 77.64 | 84.06                            | 86.97 | 93.34 | -2.434 | 0.106 | 56.82 | 58.59 | 59.61 | 62.55 | 64.55 | 68.97    | 74.64 | 78.43 | 86.65 | 90.76 | 100.75 |
| 14          | -1.649                                     | 0.098 | 57.97 | 59.89 | 60.97 | 64.03 | 66.06 | 70.33    | 75.42 | 78.59 | 84.8                             | 87.59 | 93.57 | -2.418 | 0.103 | 57.76 | 59.53 | 60.54 | 63.46 | 65.45 | 69.79    | 75.31 | 78.98 | 86.81 | 90.67 | 99.89  |
| 14.5        | -1.516                                     | 0.096 | 58.7  | 60.67 | 61.77 | 64.88 | 66.93 | 71.21    | 76.26 | 79.37 | 85.38                            | 88.04 | 93.68 | -2.403 | 0.1   | 58.67 | 60.44 | 61.45 | 64.35 | 66.31 | 70.59    | 75.99 | 79.54 | 87.05 | 90.7  | 99.3   |
| 15          | -1.383                                     | 0.095 | 59.31 | 61.31 | 62.44 | 65.59 | 67.65 | 71.94    | 76.93 | 79.98 | 85.8                             | 88.34 | 93.67 | -2.388 | 0.098 | 59.53 | 61.3  | 62.31 | 65.19 | 67.14 | 71.37    | 76.67 | 80.13 | 87.39 | 90.87 | 98.99  |
| 15.5        | -1.253                                     | 0.094 | 59.8  | 61.84 | 62.98 | 66.17 | 68.24 | 72.52    | 77.46 | 80.44 | 86.07                            | 88.51 | 93.56 | -2.374 | 0.096 | 60.35 | 62.11 | 63.12 | 66    | 67.94 | 72.14    | 77.37 | 80.76 | 87.82 | 91.18 | 98.94  |
| 16          | -1.124                                     | 0.092 | 60.18 | 62.25 | 63.41 | 66.62 | 68.7  | 72.97    | 77.84 | 80.75 | 86.21                            | 88.55 | 93.34 | -2.36  | 0.094 | 61.11 | 62.88 | 63.89 | 66.77 | 68.71 | 72.89    | 78.07 | 81.42 | 88.35 | 91.63 | 99.13  |
| 16.5        | -0.996                                     | 0.091 | 60.45 | 62.55 | 63.72 | 66.96 | 69.04 | 73.29    | 78.09 | 80.94 | 86.22                            | 88.45 | 93.01 | -2.347 | 0.093 | 61.81 | 63.59 | 64.61 | 67.5  | 69.44 | 73.62    | 78.79 | 82.12 | 88.97 | 92.19 | 99.54  |
| 17          | -0.871                                     | 0.09  | 60.63 | 62.75 | 63.94 | 67.18 | 69.27 | 73.48    | 78.21 | 80.99 | 86.1                             | 88.25 | 92.59 | -2.334 | 0.092 | 62.46 | 64.25 | 65.28 | 68.19 | 70.14 | 74.34    | 79.52 | 82.85 | 89.68 | 92.89 | 100.17 |
| 17.5        | -0.747                                     | 0.089 | 60.73 | 62.87 | 64.06 | 67.32 | 69.4  | 73.58    | 78.23 | 80.94 | 85.88                            | 87.95 | 92.08 | -2.321 | 0.092 | 63.05 | 64.86 | 65.9  | 68.84 | 70.81 | 75.05    | 80.27 | 83.62 | 90.49 | 93.71 | 101.01 |
| 18          | -0.626                                     | 0.088 | 60.76 | 62.92 | 64.12 | 67.38 | 69.45 | 73.6     | 78.17 | 80.81 | 85.6                             | 87.58 | 91.53 | -2.309 | 0.093 | 63.59 | 65.42 | 66.47 | 69.45 | 71.45 | 75.74    | 81.03 | 84.42 | 91.38 | 94.65 | 102.04 |

Supplementary Table 3. Smoothed percentiles for waist circumference according to NIH methodology, for female and male 5 to 18 years.

| Age (years) | Waist circumference (cm) (NIH methodology) |       |       |       |       |       |       |          |       |       |       |       |        |        |                                  |       |       |       |       |       |          |       |       |       |       |        |  |  |
|-------------|--------------------------------------------|-------|-------|-------|-------|-------|-------|----------|-------|-------|-------|-------|--------|--------|----------------------------------|-------|-------|-------|-------|-------|----------|-------|-------|-------|-------|--------|--|--|
|             | Female LMS parameters and centiles         |       |       |       |       |       |       |          |       |       |       |       |        |        | Male LMS parameters and centiles |       |       |       |       |       |          |       |       |       |       |        |  |  |
|             | L                                          | S     | 1th   | 3th   | 5th   | 15th  | 25th  | 50th (M) | 75th  | 85th  | 95th  | 97th  | 99th   | L      | S                                | 1th   | 3th   | 5th   | 15th  | 25th  | 50th (M) | 75th  | 85th  | 95th  | 97th  | 99th   |  |  |
| 5           | -3.418                                     | 0.083 | 44.85 | 45.9  | 46.51 | 48.25 | 49.44 | 52.05    | 55.41 | 57.67 | 62.64 | 65.16 | 71.47  | -2.778 | 0.059                            | 45.78 | 46.35 | 46.7  | 47.8  | 48.66 | 50.81    | 53.38 | 54.7  | 56.76 | 57.51 | 58.89  |  |  |
| 5.5         | -3.23                                      | 0.086 | 45.91 | 47.04 | 47.68 | 49.53 | 50.8  | 53.57    | 57.12 | 59.5  | 64.68 | 67.29 | 73.75  | -2.741 | 0.066                            | 46.79 | 47.44 | 47.83 | 49.07 | 50.04 | 52.48    | 55.43 | 56.98 | 59.44 | 60.36 | 62.08  |  |  |
| 6           | -3.058                                     | 0.089 | 46.73 | 47.92 | 48.6  | 50.57 | 51.9  | 54.83    | 58.57 | 61.07 | 66.5  | 69.21 | 75.87  | -2.707 | 0.073                            | 47.66 | 48.38 | 48.82 | 50.21 | 51.29 | 54.05    | 57.44 | 59.26 | 62.22 | 63.36 | 65.51  |  |  |
| 6.5         | -2.899                                     | 0.092 | 47.24 | 48.5  | 49.22 | 51.3  | 52.71 | 55.82    | 59.78 | 62.43 | 68.16 | 71.02 | 78.02  | -2.675 | 0.081                            | 48.37 | 49.18 | 49.67 | 51.22 | 52.43 | 55.53    | 59.44 | 61.58 | 65.16 | 66.57 | 69.3   |  |  |
| 7           | -2.753                                     | 0.097 | 47.54 | 48.87 | 49.64 | 51.84 | 53.34 | 56.64    | 60.86 | 63.69 | 69.82 | 72.88 | 80.39  | -2.646 | 0.089                            | 48.98 | 49.87 | 50.41 | 52.13 | 53.48 | 56.95    | 61.41 | 63.92 | 68.25 | 70    | 73.47  |  |  |
| 7.5         | -2.617                                     | 0.102 | 47.77 | 49.18 | 49.99 | 52.32 | 53.91 | 57.42    | 61.92 | 64.94 | 71.51 | 74.8  | 82.89  | -2.619 | 0.098                            | 49.52 | 50.5  | 51.09 | 52.98 | 54.46 | 58.3     | 63.35 | 66.26 | 71.44 | 73.59 | 77.98  |  |  |
| 8           | -2.489                                     | 0.106 | 48.09 | 49.58 | 50.43 | 52.89 | 54.57 | 58.28    | 63.06 | 66.26 | 73.24 | 76.74 | 85.34  | -2.594 | 0.106                            | 50.05 | 51.1  | 51.74 | 53.79 | 55.39 | 59.59    | 65.22 | 68.54 | 74.64 | 77.25 | 82.71  |  |  |
| 8.5         | -2.369                                     | 0.11  | 48.6  | 50.15 | 51.05 | 53.64 | 55.41 | 59.32    | 64.33 | 67.7  | 75.02 | 78.67 | 87.61  | -2.57  | 0.113                            | 50.56 | 51.69 | 52.38 | 54.58 | 56.3  | 60.83    | 67.02 | 70.76 | 77.81 | 80.91 | 87.62  |  |  |
| 9           | -2.256                                     | 0.112 | 49.28 | 50.92 | 51.86 | 54.57 | 56.43 | 60.51    | 65.75 | 69.25 | 76.82 | 80.58 | 89.7   | -2.548 | 0.119                            | 51.1  | 52.3  | 53.04 | 55.36 | 57.2  | 62.03    | 68.72 | 72.85 | 80.83 | 84.44 | 92.46  |  |  |
| 9.5         | -2.149                                     | 0.114 | 50.11 | 51.83 | 52.81 | 55.64 | 57.58 | 61.83    | 67.26 | 70.87 | 78.63 | 82.45 | 91.61  | -2.526 | 0.124                            | 51.73 | 52.98 | 53.75 | 56.19 | 58.11 | 63.19    | 70.27 | 74.7  | 83.44 | 87.47 | 96.61  |  |  |
| 10          | -2.048                                     | 0.115 | 51.05 | 52.84 | 53.86 | 56.81 | 58.82 | 63.22    | 68.81 | 72.51 | 80.38 | 84.22 | 93.31  | -2.506 | 0.126                            | 52.45 | 53.76 | 54.56 | 57.09 | 59.07 | 64.3     | 71.63 | 76.25 | 85.45 | 89.74 | 99.59  |  |  |
| 10.5        | -1.952                                     | 0.116 | 52.08 | 53.93 | 54.99 | 58.05 | 60.13 | 64.66    | 70.37 | 74.12 | 82.02 | 85.83 | 94.72  | -2.487 | 0.126                            | 53.27 | 54.62 | 55.44 | 58.03 | 60.06 | 65.39    | 72.83 | 77.53 | 86.93 | 91.32 | 101.44 |  |  |
| 11          | -1.86                                      | 0.115 | 53.21 | 55.13 | 56.23 | 59.38 | 61.51 | 66.14    | 71.93 | 75.71 | 83.55 | 87.29 | 95.86  | -2.469 | 0.125                            | 54.14 | 55.52 | 56.36 | 59.01 | 61.06 | 66.44    | 73.91 | 78.62 | 88.03 | 92.41 | 102.48 |  |  |
| 11.5        | -1.772                                     | 0.114 | 54.47 | 56.45 | 57.58 | 60.81 | 62.99 | 67.69    | 73.52 | 77.28 | 85    | 88.62 | 96.8   | -2.451 | 0.124                            | 55.05 | 56.46 | 57.31 | 59.99 | 62.07 | 67.46    | 74.9  | 79.58 | 88.87 | 93.18 | 103.01 |  |  |
| 12          | -1.688                                     | 0.112 | 55.84 | 57.87 | 59.03 | 62.32 | 64.54 | 69.29    | 75.11 | 78.83 | 86.37 | 89.86 | 97.62  | -2.435 | 0.122                            | 55.98 | 57.41 | 58.27 | 60.99 | 63.07 | 68.45    | 75.82 | 80.42 | 89.51 | 93.7  | 103.17 |  |  |
| 12.5        | -1.607                                     | 0.109 | 57.24 | 59.31 | 60.5  | 63.85 | 66.09 | 70.86    | 76.66 | 80.32 | 87.65 | 90.99 | 98.33  | -2.419 | 0.119                            | 56.94 | 58.39 | 59.26 | 61.99 | 64.08 | 69.41    | 76.66 | 81.16 | 89.97 | 93.99 | 102.98 |  |  |
| 13          | -1.53                                      | 0.107 | 58.6  | 60.71 | 61.91 | 65.31 | 67.56 | 72.35    | 78.1  | 81.69 | 88.8  | 92.01 | 98.95  | -2.403 | 0.115                            | 57.93 | 59.39 | 60.27 | 63    | 65.08 | 70.36    | 77.44 | 81.79 | 90.26 | 94.08 | 102.52 |  |  |
| 13.5        | -1.455                                     | 0.104 | 59.86 | 62.01 | 63.23 | 66.66 | 68.92 | 73.7     | 79.39 | 82.92 | 89.81 | 92.89 | 99.47  | -2.389 | 0.112                            | 58.94 | 60.41 | 61.29 | 64.02 | 66.09 | 71.28    | 78.16 | 82.36 | 90.44 | 94.05 | 101.92 |  |  |
| 14          | -1.383                                     | 0.102 | 61    | 63.17 | 64.4  | 67.86 | 70.13 | 74.9     | 80.52 | 83.98 | 90.67 | 93.62 | 99.88  | -2.374 | 0.108                            | 59.96 | 61.43 | 62.32 | 65.04 | 67.08 | 72.17    | 78.86 | 82.9  | 90.6  | 94    | 101.33 |  |  |
| 14.5        | -1.314                                     | 0.1   | 61.99 | 64.19 | 65.43 | 68.91 | 71.18 | 75.93    | 81.48 | 84.87 | 91.37 | 94.21 | 100.19 | -2.36  | 0.105                            | 60.95 | 62.43 | 63.32 | 66.03 | 68.05 | 73.05    | 79.54 | 83.44 | 90.79 | 94.01 | 100.88 |  |  |
| 15          | -1.247                                     | 0.098 | 62.84 | 65.06 | 66.31 | 69.8  | 72.07 | 76.79    | 82.27 | 85.59 | 91.91 | 94.66 | 100.38 | -2.347 | 0.102                            | 61.91 | 63.4  | 64.28 | 66.99 | 68.99 | 73.91    | 80.23 | 84    | 91.07 | 94.14 | 100.63 |  |  |
| 15.5        | -1.182                                     | 0.096 | 63.55 | 65.78 | 67.04 | 70.53 | 72.8  | 77.49    | 82.9  | 86.16 | 92.31 | 94.97 | 100.47 | -2.334 | 0.099                            | 62.83 | 64.32 | 65.21 | 67.91 | 69.9  | 74.75    | 80.93 | 84.6  | 91.44 | 94.38 | 100.58 |  |  |
| 16          | -1.119                                     | 0.094 | 64.11 | 66.36 | 67.62 | 71.11 | 73.38 | 78.04    | 83.37 | 86.56 | 92.56 | 95.13 | 100.43 | -2.322 | 0.097                            | 63.7  | 65.2  | 66.09 | 68.79 | 70.77 | 75.57    | 81.65 | 85.24 | 91.9  | 94.76 | 100.74 |  |  |
| 16.5        | -1.058                                     | 0.093 | 64.54 | 66.79 | 68.06 | 71.54 | 73.8  | 78.42    | 83.68 | 86.81 | 92.66 | 95.16 | 100.26 | -2.31  | 0.095                            | 64.51 | 66.03 | 66.92 | 69.63 | 71.61 | 76.38    | 82.38 | 85.92 | 92.46 | 95.26 | 101.11 |  |  |
| 17          | -0.999                                     | 0.092 | 64.84 | 67.1  | 68.36 | 71.84 | 74.08 | 78.66    | 83.84 | 86.92 | 92.62 | 95.04 | 99.97  | -2.298 | 0.094                            | 65.27 | 66.8  | 67.7  | 70.43 | 72.41 | 77.17    | 83.13 | 86.64 | 93.12 | 95.89 | 101.66 |  |  |
| 17.5        | -0.942                                     | 0.09  | 65.04 | 67.3  | 68.56 | 72.02 | 74.25 | 78.79    | 83.89 | 86.9  | 92.46 | 94.81 | 99.58  | -2.287 | 0.093                            | 65.97 | 67.52 | 68.44 | 71.18 | 73.18 | 77.94    | 83.9  | 87.4  | 93.87 | 96.63 | 102.38 |  |  |
| 18          | -0.886                                     | 0.089 | 65.15 | 67.41 | 68.66 | 72.12 | 74.33 | 78.81    | 83.84 | 86.79 | 92.22 | 94.5  | 99.12  | -2.276 | 0.093                            | 66.63 | 68.2  | 69.12 | 71.9  | 73.92 | 78.7     | 84.68 | 88.2  | 94.7  | 97.48 | 103.26 |  |  |

Supplementary Table 4. Smoothed percentiles for hip circumference, for female and male 5 to 18 years.

| Age (years) | Hip circumference (cm)             |       |       |       |       |       |       |          |       |       |       |        |        |        |                                  |       |       |       |       |       |          |       |       |       |       |        |  |  |
|-------------|------------------------------------|-------|-------|-------|-------|-------|-------|----------|-------|-------|-------|--------|--------|--------|----------------------------------|-------|-------|-------|-------|-------|----------|-------|-------|-------|-------|--------|--|--|
|             | Female LMS parameters and centiles |       |       |       |       |       |       |          |       |       |       |        |        |        | Male LMS parameters and centiles |       |       |       |       |       |          |       |       |       |       |        |  |  |
|             | L                                  | S     | 1th   | 3th   | 5th   | 15th  | 25th  | 50th (M) | 75th  | 85th  | 95th  | 97th   | 99th   | L      | S                                | 1th   | 3th   | 5th   | 15th  | 25th  | 50th (M) | 75th  | 85th  | 95th  | 97th  | 99th   |  |  |
| 5           | -3.385                             | 0.069 | 50.25 | 51.29 | 51.89 | 53.58 | 54.71 | 57.14    | 60.12 | 62.03 | 65.98 | 67.84  | 72.11  | -2.142 | 0.061                            | 49.41 | 50.47 | 51.06 | 52.69 | 53.75 | 55.9     | 58.35 | 59.81 | 62.56 | 63.73 | 66.16  |  |  |
| 5.5         | -3.161                             | 0.071 | 51.3  | 52.41 | 53.04 | 54.83 | 56.03 | 58.58    | 61.69 | 63.68 | 67.74 | 69.64  | 73.94  | -2.014 | 0.065                            | 50.56 | 51.71 | 52.35 | 54.14 | 55.29 | 57.64    | 60.33 | 61.94 | 64.95 | 66.25 | 68.93  |  |  |
| 6           | -2.957                             | 0.072 | 52.26 | 53.43 | 54.1  | 55.98 | 57.24 | 59.9     | 63.14 | 65.2  | 69.36 | 71.28  | 75.59  | -1.896 | 0.068                            | 51.61 | 52.86 | 53.56 | 55.5  | 56.75 | 59.32    | 62.26 | 64.02 | 67.33 | 68.76 | 71.7   |  |  |
| 6.5         | -2.768                             | 0.074 | 53.16 | 54.41 | 55.11 | 57.1  | 58.42 | 61.23    | 64.63 | 66.77 | 71.09 | 73.07  | 77.47  | -1.788 | 0.073                            | 52.58 | 53.94 | 54.7  | 56.8  | 58.16 | 60.96    | 64.18 | 66.11 | 69.75 | 71.33 | 74.58  |  |  |
| 7           | -2.594                             | 0.078 | 54.04 | 55.37 | 56.13 | 58.26 | 59.67 | 62.67    | 66.3  | 68.59 | 73.19 | 75.3   | 79.97  | -1.688 | 0.078                            | 53.48 | 54.95 | 55.78 | 58.06 | 59.54 | 62.6     | 66.13 | 68.25 | 72.27 | 74.01 | 77.63  |  |  |
| 7.5         | -2.432                             | 0.082 | 54.85 | 56.28 | 57.1  | 59.39 | 60.92 | 64.17    | 68.1  | 70.59 | 75.59 | 77.88  | 82.97  | -1.595 | 0.083                            | 54.34 | 55.93 | 56.82 | 59.3  | 60.91 | 64.25    | 68.11 | 70.44 | 74.88 | 76.8  | 80.82  |  |  |
| 8           | -2.28                              | 0.087 | 55.59 | 57.13 | 58.01 | 60.48 | 62.13 | 65.64    | 69.91 | 72.6  | 78.03 | 80.53  | 86.06  | -1.508 | 0.087                            | 55.21 | 56.92 | 57.88 | 60.55 | 62.3  | 65.92    | 70.11 | 72.66 | 77.5  | 79.61 | 84.02  |  |  |
| 8.5         | -2.138                             | 0.091 | 56.38 | 58.02 | 58.96 | 61.61 | 63.38 | 67.14    | 71.72 | 74.61 | 80.43 | 83.11  | 89.04  | -1.426 | 0.092                            | 56.12 | 57.95 | 58.97 | 61.84 | 63.71 | 67.59    | 72.11 | 74.85 | 80.08 | 82.36 | 87.13  |  |  |
| 9           | -2.004                             | 0.095 | 57.29 | 59.04 | 60.04 | 62.86 | 64.74 | 68.75    | 73.61 | 76.69 | 82.86 | 85.69  | 91.93  | -1.348 | 0.095                            | 57.08 | 59.02 | 60.11 | 63.15 | 65.14 | 69.27    | 74.08 | 77    | 82.58 | 85.01 | 90.09  |  |  |
| 9.5         | -1.877                             | 0.098 | 58.34 | 60.2  | 61.26 | 64.26 | 66.25 | 70.5     | 75.64 | 78.89 | 85.37 | 88.33  | 94.83  | -1.275 | 0.098                            | 58.1  | 60.14 | 61.29 | 64.49 | 66.59 | 70.95    | 76.01 | 79.08 | 84.95 | 87.5  | 92.83  |  |  |
| 10          | -1.756                             | 0.1   | 59.51 | 61.49 | 62.61 | 65.78 | 67.89 | 72.37    | 77.77 | 81.17 | 87.93 | 91     | 97.7   | -1.206 | 0.1                              | 59.17 | 61.31 | 62.51 | 65.87 | 68.06 | 72.6     | 77.88 | 81.08 | 87.17 | 89.81 | 95.32  |  |  |
| 10.5        | -1.641                             | 0.102 | 60.83 | 62.91 | 64.08 | 67.42 | 69.63 | 74.32    | 79.94 | 83.46 | 90.42 | 93.56  | 100.36 | -1.14  | 0.101                            | 60.3  | 62.52 | 63.77 | 67.25 | 69.53 | 74.23    | 79.68 | 82.97 | 89.22 | 91.92 | 97.54  |  |  |
| 11          | -1.532                             | 0.102 | 62.41 | 64.58 | 65.81 | 69.28 | 71.58 | 76.42    | 82.19 | 85.77 | 92.79 | 95.93  | 102.67 | -1.077 | 0.101                            | 61.47 | 63.76 | 65.05 | 68.65 | 70.99 | 75.82    | 81.39 | 84.74 | 91.08 | 93.82 | 99.47  |  |  |
| 11.5        | -1.427                             | 0.1   | 64.35 | 66.6  | 67.87 | 71.44 | 73.79 | 78.72    | 84.53 | 88.11 | 95.03 | 98.09  | 104.59 | -1.017 | 0.101                            | 62.68 | 65.04 | 66.36 | 70.04 | 72.43 | 77.35    | 83    | 86.39 | 92.76 | 95.49 | 101.12 |  |  |
| 12          | -1.327                             | 0.097 | 66.62 | 68.93 | 70.23 | 73.86 | 76.23 | 81.17    | 86.92 | 90.42 | 97.12 | 100.04 | 106.16 | -0.96  | 0.1                              | 63.94 | 66.35 | 67.7  | 71.44 | 73.86 | 78.83    | 84.51 | 87.9  | 94.23 | 96.93 | 102.48 |  |  |
| 12.5        | -1.232                             | 0.093 | 69.05 | 71.39 | 72.71 | 76.35 | 78.73 | 83.62    | 89.24 | 92.62 | 99.01 | 101.76 | 107.45 | -0.905 | 0.098                            | 65.26 | 67.71 | 69.07 | 72.85 | 75.28 | 80.27    | 85.92 | 89.27 | 95.51 | 98.16 | 10     |  |  |

Supplementary Table 5. Smoothed percentiles for skinfold thickness right triceps, for female and male 5 to 18 years.

| Age (years) | Right triceps skinfold (mm)        |       |      |      |       |       |       |          |       |       |                                  |       |       |        |       |      |      |      |      |      |          |       |       |       |       |       |
|-------------|------------------------------------|-------|------|------|-------|-------|-------|----------|-------|-------|----------------------------------|-------|-------|--------|-------|------|------|------|------|------|----------|-------|-------|-------|-------|-------|
|             | Female LMS parameters and centiles |       |      |      |       |       |       |          |       |       | Male LMS parameters and centiles |       |       |        |       |      |      |      |      |      |          |       |       |       |       |       |
|             | L                                  | S     | 1th  | 3th  | 5th   | 15th  | 25th  | 50th (M) | 75th  | 85th  | 95th                             | 97th  | 99th  | L      | S     | 1th  | 3th  | 5th  | 15th | 25th | 50th (M) | 75th  | 85th  | 95th  | 97th  | 99th  |
| 5           | -0.6                               | 0.214 | 5.71 | 6.16 | 6.42  | 7.17  | 7.69  | 8.84     | 10.28 | 11.22 | 13.13                            | 14.02 | 15.99 | -0.49  | 0.27  | 4.78 | 5.25 | 5.53 | 6.36 | 6.94 | 8.26     | 9.99  | 11.16 | 13.62 | 14.8  | 17.48 |
| 5.5         | -0.522                             | 0.233 | 5.78 | 6.28 | 6.57  | 7.42  | 8.01  | 9.31     | 10.97 | 12.05 | 14.28                            | 15.32 | 17.61 | -0.479 | 0.285 | 4.6  | 5.08 | 5.36 | 6.21 | 6.81 | 8.18     | 10.01 | 11.25 | 13.91 | 15.2  | 18.17 |
| 6           | -0.451                             | 0.252 | 5.8  | 6.36 | 6.68  | 7.63  | 8.29  | 9.77     | 11.66 | 12.9  | 15.46                            | 16.65 | 19.3  | -0.47  | 0.299 | 4.53 | 5.02 | 5.31 | 6.19 | 6.82 | 8.26     | 10.21 | 11.54 | 14.44 | 15.86 | 19.16 |
| 6.5         | -0.385                             | 0.272 | 5.79 | 6.4  | 6.75  | 7.81  | 8.55  | 10.21    | 12.35 | 13.76 | 16.68                            | 18.05 | 21.09 | -0.462 | 0.311 | 4.56 | 5.08 | 5.38 | 6.31 | 6.97 | 8.52     | 10.63 | 12.08 | 15.28 | 16.86 | 20.56 |
| 7           | -0.324                             | 0.292 | 5.75 | 6.41 | 6.8   | 7.97  | 8.78  | 10.63    | 13.03 | 14.62 | 17.93                            | 19.47 | 22.91 | -0.454 | 0.322 | 4.67 | 5.22 | 5.54 | 6.53 | 7.24 | 8.91     | 11.21 | 12.81 | 16.36 | 18.12 | 22.31 |
| 7.5         | -0.268                             | 0.311 | 5.7  | 6.42 | 6.84  | 8.11  | 9.01  | 11.04    | 13.7  | 15.46 | 19.13                            | 20.84 | 24.65 | -0.448 | 0.333 | 4.82 | 5.39 | 5.74 | 6.8  | 7.56 | 9.37     | 11.87 | 13.62 | 17.55 | 19.53 | 24.24 |
| 8           | -0.215                             | 0.326 | 5.67 | 6.44 | 6.89  | 8.26  | 9.23  | 11.44    | 14.33 | 16.25 | 20.22                            | 22.07 | 26.16 | -0.442 | 0.342 | 4.96 | 5.57 | 5.93 | 7.05 | 7.87 | 9.81     | 12.51 | 14.43 | 18.74 | 20.92 | 26.18 |
| 8.5         | -0.165                             | 0.336 | 5.67 | 6.48 | 6.97  | 8.43  | 9.47  | 11.83    | 14.91 | 16.94 | 21.13                            | 23.08 | 27.34 | -0.437 | 0.351 | 5.08 | 5.71 | 6.1  | 7.28 | 8.15 | 10.21    | 13.1  | 15.17 | 19.86 | 22.25 | 28.03 |
| 9           | -0.118                             | 0.342 | 5.71 | 6.57 | 7.08  | 8.63  | 9.73  | 12.21    | 15.43 | 17.53 | 21.85                            | 23.83 | 28.14 | -0.433 | 0.359 | 5.16 | 5.82 | 6.22 | 7.46 | 8.36 | 10.53    | 13.6  | 15.8  | 20.83 | 23.41 | 29.7  |
| 9.5         | -0.073                             | 0.342 | 5.8  | 6.71 | 7.25  | 8.86  | 10.01 | 12.58    | 15.88 | 18.02 | 22.35                            | 24.32 | 28.57 | -0.428 | 0.367 | 5.2  | 5.88 | 6.3  | 7.57 | 8.51 | 10.77    | 13.98 | 16.3  | 21.63 | 24.38 | 31.13 |
| 10          | -0.031                             | 0.338 | 5.95 | 6.89 | 7.46  | 9.13  | 10.31 | 12.94    | 16.27 | 18.41 | 22.68                            | 24.6  | 28.7  | -0.425 | 0.374 | 5.21 | 5.9  | 6.33 | 7.63 | 8.6  | 10.92    | 14.26 | 16.67 | 22.26 | 25.16 | 32.31 |
| 10.5        | 0.009                              | 0.331 | 6.13 | 7.12 | 7.7   | 9.43  | 10.63 | 13.29    | 16.62 | 18.73 | 22.89                            | 24.75 | 28.66 | -0.421 | 0.38  | 5.18 | 5.88 | 6.31 | 7.63 | 8.61 | 10.99    | 14.41 | 16.91 | 22.7  | 25.73 | 33.22 |
| 11          | 0.047                              | 0.323 | 6.34 | 7.36 | 7.96  | 9.73  | 10.95 | 13.64    | 16.94 | 19.02 | 23.06                            | 24.84 | 28.56 | -0.418 | 0.386 | 5.11 | 5.81 | 6.24 | 7.57 | 8.56 | 10.96    | 14.45 | 16.99 | 22.95 | 26.06 | 33.83 |
| 11.5        | 0.084                              | 0.316 | 6.55 | 7.6  | 8.22  | 10.03 | 11.28 | 13.98    | 17.26 | 19.3  | 23.23                            | 24.95 | 28.5  | -0.415 | 0.392 | 5.02 | 5.71 | 6.14 | 7.47 | 8.46 | 10.87    | 14.38 | 16.96 | 23.02 | 26.21 | 34.18 |
| 12          | 0.118                              | 0.309 | 6.75 | 7.84 | 8.47  | 10.33 | 11.59 | 14.31    | 17.58 | 19.59 | 23.44                            | 25.1  | 28.52 | -0.412 | 0.397 | 4.9  | 5.59 | 6.01 | 7.33 | 8.32 | 10.73    | 14.25 | 16.85 | 22.97 | 26.21 | 34.35 |
| 12.5        | 0.152                              | 0.303 | 6.94 | 8.06 | 8.71  | 10.61 | 11.89 | 14.64    | 17.9  | 19.89 | 23.67                            | 25.29 | 28.6  | -0.41  | 0.402 | 4.79 | 5.47 | 5.88 | 7.19 | 8.17 | 10.57    | 14.1  | 16.7  | 22.88 | 26.15 | 34.42 |
| 13          | 0.184                              | 0.299 | 7.11 | 8.27 | 8.94  | 10.87 | 12.18 | 14.96    | 18.23 | 20.21 | 23.94                            | 25.52 | 28.76 | -0.407 | 0.407 | 4.68 | 5.35 | 5.76 | 7.06 | 8.03 | 10.42    | 13.94 | 16.56 | 22.78 | 26.09 | 34.48 |
| 13.5        | 0.215                              | 0.295 | 7.27 | 8.46 | 9.15  | 11.13 | 12.46 | 15.27    | 18.56 | 20.53 | 24.23                            | 25.79 | 28.96 | -0.405 | 0.412 | 4.58 | 5.25 | 5.66 | 6.94 | 7.91 | 10.29    | 13.81 | 16.44 | 22.7  | 26.05 | 34.57 |
| 14          | 0.245                              | 0.292 | 7.41 | 8.64 | 9.35  | 11.38 | 12.73 | 15.58    | 18.89 | 20.87 | 24.54                            | 26.09 | 29.21 | -0.403 | 0.416 | 4.5  | 5.16 | 5.57 | 6.84 | 7.81 | 10.18    | 13.72 | 16.35 | 22.68 | 26.07 | 34.72 |
| 14.5        | 0.274                              | 0.29  | 7.54 | 8.8  | 9.53  | 11.61 | 12.99 | 15.89    | 19.22 | 21.2  | 24.87                            | 26.4  | 29.49 | -0.401 | 0.42  | 4.43 | 5.09 | 5.49 | 6.77 | 7.73 | 10.11    | 13.65 | 16.31 | 22.7  | 26.13 | 34.93 |
| 15          | 0.302                              | 0.288 | 7.66 | 8.96 | 9.71  | 11.84 | 13.25 | 16.19    | 19.55 | 21.54 | 25.2                             | 26.73 | 29.8  | -0.399 | 0.424 | 4.38 | 5.03 | 5.43 | 6.71 | 7.67 | 10.05    | 13.62 | 16.29 | 22.76 | 26.24 | 35.19 |
| 15.5        | 0.329                              | 0.287 | 7.76 | 9.1  | 9.87  | 12.06 | 13.5  | 16.48    | 19.88 | 21.88 | 25.55                            | 27.08 | 30.12 | -0.397 | 0.428 | 4.33 | 4.99 | 5.39 | 6.66 | 7.62 | 10.02    | 13.61 | 16.31 | 22.85 | 26.39 | 35.51 |
| 16          | 0.355                              | 0.286 | 7.86 | 9.24 | 10.03 | 12.27 | 13.74 | 16.77    | 20.21 | 22.23 | 25.91                            | 27.44 | 30.47 | -0.396 | 0.431 | 4.3  | 4.95 | 5.35 | 6.63 | 7.59 | 10       | 13.62 | 16.35 | 22.98 | 26.58 | 35.87 |
| 16.5        | 0.38                               | 0.285 | 7.94 | 9.36 | 10.17 | 12.47 | 13.97 | 17.06    | 20.54 | 22.58 | 26.28                            | 27.81 | 30.84 | -0.394 | 0.434 | 4.27 | 4.92 | 5.32 | 6.6  | 7.57 | 9.99     | 13.64 | 16.4  | 23.13 | 26.79 | 36.26 |
| 17          | 0.404                              | 0.285 | 8.01 | 9.47 | 10.31 | 12.66 | 14.2  | 17.34    | 20.87 | 22.93 | 26.65                            | 28.18 | 31.22 | -0.393 | 0.438 | 4.25 | 4.9  | 5.3  | 6.59 | 7.56 | 10       | 13.68 | 16.47 | 23.29 | 27.01 | 36.67 |
| 17.5        | 0.428                              | 0.285 | 8.07 | 9.58 | 10.44 | 12.85 | 14.42 | 17.62    | 21.2  | 23.28 | 27.03                            | 28.57 | 31.61 | -0.391 | 0.441 | 4.23 | 4.88 | 5.29 | 6.57 | 7.55 | 10.01    | 13.72 | 16.55 | 23.46 | 27.25 | 37.09 |
| 18          | 0.451                              | 0.286 | 8.12 | 9.67 | 10.55 | 13.02 | 14.63 | 17.9     | 21.53 | 23.64 | 27.42                            | 28.96 | 32.02 | -0.39  | 0.444 | 4.21 | 4.87 | 5.27 | 6.56 | 7.55 | 10.02    | 13.77 | 16.63 | 23.64 | 27.49 | 37.51 |

Supplementary Table 6. Smoothed percentiles for skinfold thickness right thigh, for female and male 5 to 18 years.

| Age (years) | Right thigh skinfold (mm)          |       |       |       |       |       |       |          |       |       |                                  |       |       |        |       |      |      |      |      |       |          |       |       |       |       |       |
|-------------|------------------------------------|-------|-------|-------|-------|-------|-------|----------|-------|-------|----------------------------------|-------|-------|--------|-------|------|------|------|------|-------|----------|-------|-------|-------|-------|-------|
|             | Female LMS parameters and centiles |       |       |       |       |       |       |          |       |       | Male LMS parameters and centiles |       |       |        |       |      |      |      |      |       |          |       |       |       |       |       |
|             | L                                  | S     | 1th   | 3th   | 5th   | 15th  | 25th  | 50th (M) | 75th  | 85th  | 95th                             | 97th  | 99th  | L      | S     | 1th  | 3th  | 5th  | 15th | 25th  | 50th (M) | 75th  | 85th  | 95th  | 97th  | 99th  |
| 5           | 0.705                              | 0.353 | 3.69  | 5.14  | 5.96  | 8.25  | 9.71  | 12.6     | 15.71 | 17.45 | 20.51                            | 21.73 | 24.1  | 0.082  | 0.283 | 5.49 | 6.05 | 6.38 | 7.44 | 8.24  | 10.19    | 12.57 | 13.85 | 15.99 | 16.82 | 18.37 |
| 5.5         | 0.486                              | 0.352 | 4.67  | 5.97  | 6.72  | 8.88  | 10.3  | 13.26    | 16.6  | 18.55 | 22.08                            | 23.54 | 26.42 | 0.039  | 0.304 | 5.37 | 5.95 | 6.3  | 7.41 | 8.26  | 10.37    | 13    | 14.45 | 16.91 | 17.87 | 19.71 |
| 6           | 0.309                              | 0.351 | 5.43  | 6.65  | 7.36  | 9.45  | 10.87 | 13.89    | 17.45 | 19.61 | 23.62                            | 25.32 | 28.76 | -0.001 | 0.325 | 5.33 | 5.93 | 6.3  | 7.47 | 8.37  | 10.66    | 13.58 | 15.22 | 18.06 | 19.18 | 21.36 |
| 6.5         | 0.177                              | 0.349 | 6.03  | 7.21  | 7.91  | 9.97  | 11.4  | 14.5     | 18.27 | 20.6  | 25.07                            | 27    | 30.99 | -0.037 | 0.344 | 5.39 | 6.02 | 6.41 | 7.66 | 8.64  | 11.14    | 14.41 | 16.29 | 19.58 | 20.91 | 23.51 |
| 7           | 0.083                              | 0.348 | 6.52  | 7.69  | 8.39  | 10.46 | 11.9  | 15.09    | 19.04 | 21.53 | 26.41                            | 28.55 | 33.05 | -0.071 | 0.361 | 5.57 | 6.25 | 6.67 | 8.02 | 9.08  | 11.85    | 15.53 | 17.7  | 21.56 | 23.15 | 26.28 |
| 7.5         | 0.019                              | 0.347 | 6.93  | 8.11  | 8.81  | 10.91 | 12.38 | 15.66    | 19.78 | 22.41 | 27.63                            | 29.96 | 34.9  | -0.102 | 0.377 | 5.84 | 6.56 | 7.01 | 8.47 | 9.63  | 12.69    | 16.84 | 19.33 | 23.85 | 25.72 | 29.48 |
| 8           | -0.022                             | 0.346 | 7.29  | 8.49  | 9.2   | 11.33 | 12.84 | 16.21    | 20.48 | 23.24 | 28.75                            | 31.23 | 36.54 | -0.132 | 0.389 | 6.11 | 6.88 | 7.36 | 8.93 | 10.18 | 13.51    | 18.13 | 20.94 | 26.14 | 28.32 | 32.76 |
| 8.5         | -0.048                             | 0.345 | 7.61  | 8.83  | 9.56  | 11.74 | 13.28 | 16.74    | 21.16 | 24.02 | 29.78                            | 32.39 | 37.99 | -0.159 | 0.4   | 6.36 | 7.17 | 7.68 | 9.33 | 10.66 | 14.24    | 19.28 | 22.4  | 28.26 | 30.76 | 35.88 |
| 9           | -0.062                             | 0.345 | 7.9   | 9.14  | 9.89  | 12.12 | 13.7  | 17.26    | 21.81 | 24.77 | 30.74                            | 33.45 | 39.28 | -0.185 | 0.409 | 6.56 | 7.4  | 7.92 | 9.64 | 11.04 | 14.81    | 20.22 | 23.61 | 30.07 | 32.87 | 38.68 |
| 9.5         | -0.071                             | 0.344 | 8.16  | 9.44  | 10.21 | 12.5  | 14.12 | 17.77    | 22.45 | 25.49 | 31.64                            | 34.44 | 40.48 | -0.21  | 0.416 | 6.69 | 7.54 | 8.08 | 9.85 | 11.29 | 15.2     | 20.89 | 24.51 | 31.52 | 34.59 | 41.02 |
| 10          | -0.079                             | 0.343 | 8.42  | 9.73  | 10.52 | 12.86 | 14.52 | 18.26    | 23.07 | 26.19 | 32.53                            | 35.41 | 41.64 | -0.233 | 0.422 | 6.76 | 7.62 | 8.16 | 9.95 | 11.42 | 15.43    | 21.32 | 25.13 | 32.58 | 35.89 | 42.91 |
| 10.5        | -0.09                              | 0.342 | 8.69  | 10.03 | 10.83 | 13.22 | 14.92 | 18.75    | 23.67 | 26.89 | 33.41                            | 36.39 | 42.83 | -0.255 | 0.428 | 6.75 | 7.61 | 8.15 | 9.95 | 11.41 | 15.46    | 21.48 | 25.41 | 33.22 | 36.73 | 44.25 |
| 11          | -0.105                             | 0.342 | 8.96  | 10.32 | 11.14 | 13.58 | 15.31 | 19.22    | 24.27 | 27.57 | 34.3                             | 37.38 | 44.07 | -0.277 | 0.432 | 6.67 | 7.51 | 8.05 | 9.81 | 11.26 | 15.28    | 21.34 | 25.33 | 33.37 | 37.03 | 44.94 |
| 11.5        | -0.123                             | 0.341 | 9.24  | 10.62 | 11.44 | 13.93 | 15.69 | 19.68    | 24.86 | 28.25 | 35.19                            | 38.39 | 45.35 | -0.297 | 0.436 | 6.5  | 7.33 | 7.84 | 9.56 | 10.98 | 14.92    | 20.91 | 24.9  | 33.05 | 36.8  | 44.99 |
| 12          | -0.139                             | 0.34  | 9.5   | 10.91 | 11.75 | 14.27 | 16.07 | 20.14    | 25.43 | 28.91 | 36.07                            | 39.37 | 46.59 | -0.316 | 0.439 | 6.29 | 7.08 | 7.57 | 9.23 | 10.6  | 14.41    | 20.27 | 24.22 | 32.36 | 36.14 | 44.52 |
| 12.5        | -0.152                             | 0.34  | 9.76  | 11.19 | 12.04 | 14.61 | 16.43 | 20.58    | 25.99 | 29.56 | 36.91                            | 40.31 | 47.77 | -0.335 | 0.441 | 6.05 | 6.81 | 7.28 | 8.87 | 10.18 | 13.85    | 19.53 | 23.4  | 31.46 | 35.25 | 43.72 |
| 13          | -0.159                             | 0.339 | 10    | 11.45 | 12.32 | 14.93 | 16.79 | 21.02    | 26.54 | 30.18 | 37.7                             | 41.18 | 48.83 | -0.353 | 0.443 | 5.82 | 6.54 | 7    | 8.52 | 9.77  | 13.3     | 18.79 | 22.56 | 30.51 | 34.29 | 42.81 |
| 13.5        | -0.159                             | 0.339 | 10.21 | 11.7  | 12.58 | 15.25 | 17.14 | 21.4     |       |       |                                  |       |       |        |       |      |      |      |      |       |          |       |       |       |       |       |

Supplementary Table 7. Smoothed percentiles for skinfold thickness right calf, for female and male 5 to 18 years.

| Age (years) | Right calf skinfold (mm)           |       |      |      |      |       |       |          |       |       |                                  |       |       |        |       |      |      |      |      |      |          |       |       |       |       |       |
|-------------|------------------------------------|-------|------|------|------|-------|-------|----------|-------|-------|----------------------------------|-------|-------|--------|-------|------|------|------|------|------|----------|-------|-------|-------|-------|-------|
|             | Female LMS parameters and centiles |       |      |      |      |       |       |          |       |       | Male LMS parameters and centiles |       |       |        |       |      |      |      |      |      |          |       |       |       |       |       |
|             | L                                  | S     | 1th  | 3th  | 5th  | 15th  | 25th  | 50th (M) | 75th  | 85th  | 95th                             | 97th  | 99th  | L      | S     | 1th  | 3th  | 5th  | 15th | 25th | 50th (M) | 75th  | 85th  | 95th  | 97th  | 99th  |
| 5           | -0.577                             | 0.217 | 5.35 | 5.77 | 6.02 | 6.74  | 7.23  | 8.32     | 9.69  | 10.58 | 12.4                             | 13.24 | 15.1  | -0.271 | 0.209 | 4.67 | 5.05 | 5.27 | 5.9  | 6.34 | 7.31     | 8.47  | 9.17  | 10.47 | 11.02 | 12.16 |
| 5.5         | -0.494                             | 0.256 | 4.97 | 5.44 | 5.72 | 6.53  | 7.1   | 8.39     | 10.05 | 11.15 | 13.46                            | 14.55 | 17.01 | -0.271 | 0.242 | 4.45 | 4.85 | 5.09 | 5.78 | 6.28 | 7.41     | 8.81  | 9.66  | 11.26 | 11.95 | 13.37 |
| 6           | -0.422                             | 0.291 | 4.67 | 5.18 | 5.48 | 6.38  | 7.02  | 8.48     | 10.41 | 11.72 | 14.49                            | 15.82 | 18.85 | -0.271 | 0.275 | 4.27 | 4.69 | 4.94 | 5.7  | 6.25 | 7.56     | 9.23  | 10.26 | 12.21 | 13.06 | 14.83 |
| 6.5         | -0.36                              | 0.322 | 4.42 | 4.96 | 5.29 | 6.27  | 6.97  | 8.59     | 10.77 | 12.26 | 15.47                            | 17.02 | 20.59 | -0.27  | 0.309 | 4.14 | 4.58 | 4.85 | 5.67 | 6.28 | 7.78     | 9.77  | 11.01 | 13.4  | 14.45 | 16.66 |
| 7           | -0.305                             | 0.352 | 4.21 | 4.78 | 5.13 | 6.18  | 6.95  | 8.74     | 11.18 | 12.87 | 16.53                            | 18.32 | 22.44 | -0.27  | 0.344 | 4.05 | 4.51 | 4.79 | 5.68 | 6.36 | 8.08     | 10.43 | 11.92 | 14.84 | 16.14 | 18.9  |
| 7.5         | -0.257                             | 0.379 | 4.05 | 4.66 | 5.03 | 6.17  | 7     | 8.96     | 11.68 | 13.56 | 17.67                            | 19.69 | 24.34 | -0.27  | 0.377 | 3.98 | 4.47 | 4.76 | 5.72 | 6.47 | 8.41     | 11.15 | 12.92 | 16.45 | 18.03 | 21.44 |
| 8           | -0.214                             | 0.397 | 3.99 | 4.64 | 5.03 | 6.25  | 7.15  | 9.28     | 12.22 | 14.27 | 18.75                            | 20.93 | 25.96 | -0.27  | 0.406 | 3.95 | 4.45 | 4.76 | 5.78 | 6.59 | 8.75     | 11.9  | 13.96 | 18.13 | 20.02 | 24.14 |
| 8.5         | -0.175                             | 0.406 | 4.03 | 4.72 | 5.14 | 6.44  | 7.4   | 9.67     | 12.8  | 14.97 | 19.67                            | 21.95 | 27.16 | -0.269 | 0.431 | 3.95 | 4.47 | 4.79 | 5.87 | 6.73 | 9.11     | 12.65 | 15.01 | 19.81 | 22.01 | 26.82 |
| 9           | -0.14                              | 0.408 | 4.16 | 4.89 | 5.34 | 6.72  | 7.74  | 10.14    | 13.42 | 15.67 | 20.49                            | 22.81 | 28.03 | -0.269 | 0.45  | 3.98 | 4.52 | 4.86 | 5.98 | 6.9  | 9.47     | 13.39 | 16.01 | 21.41 | 23.9  | 29.37 |
| 9.5         | -0.108                             | 0.404 | 4.36 | 5.14 | 5.61 | 7.08  | 8.15  | 10.66    | 14.06 | 16.37 | 21.25                            | 23.56 | 28.73 | -0.269 | 0.465 | 4.04 | 4.58 | 4.93 | 6.1  | 7.07 | 9.82     | 14.06 | 16.93 | 22.85 | 25.6  | 31.65 |
| 10          | -0.079                             | 0.398 | 4.6  | 5.43 | 5.93 | 7.48  | 8.61  | 11.23    | 14.72 | 17.07 | 21.98                            | 24.27 | 29.34 | -0.269 | 0.476 | 4.09 | 4.65 | 5.01 | 6.22 | 7.23 | 10.12    | 14.64 | 17.71 | 24.08 | 27.04 | 33.58 |
| 10.5        | -0.052                             | 0.39  | 4.86 | 5.74 | 6.27 | 7.91  | 9.09  | 11.8     | 15.39 | 17.77 | 22.68                            | 24.96 | 29.93 | -0.269 | 0.484 | 4.14 | 4.71 | 5.08 | 6.31 | 7.36 | 10.36    | 15.1  | 18.33 | 25.04 | 28.17 | 35.09 |
| 11          | -0.027                             | 0.383 | 5.12 | 6.06 | 6.62 | 8.33  | 9.56  | 12.37    | 16.04 | 18.45 | 23.38                            | 25.64 | 30.53 | -0.269 | 0.49  | 4.17 | 4.75 | 5.12 | 6.38 | 7.44 | 10.52    | 15.41 | 18.76 | 25.72 | 28.97 | 36.17 |
| 11.5        | -0.004                             | 0.377 | 5.39 | 6.37 | 6.96 | 8.75  | 10.03 | 12.94    | 16.69 | 19.13 | 24.08                            | 26.33 | 31.17 | -0.268 | 0.494 | 4.18 | 4.76 | 5.13 | 6.4  | 7.48 | 10.6     | 15.59 | 19.01 | 26.13 | 29.45 | 36.83 |
| 12          | 0.017                              | 0.372 | 5.64 | 6.67 | 7.29 | 9.16  | 10.49 | 13.49    | 17.33 | 19.81 | 24.8                             | 27.05 | 31.86 | -0.268 | 0.496 | 4.16 | 4.74 | 5.12 | 6.39 | 7.47 | 10.61    | 15.63 | 19.08 | 26.29 | 29.66 | 37.13 |
| 12.5        | 0.037                              | 0.368 | 5.87 | 6.95 | 7.6  | 9.54  | 10.92 | 14.02    | 17.95 | 20.48 | 25.52                            | 27.78 | 32.58 | -0.268 | 0.498 | 4.13 | 4.71 | 5.08 | 6.35 | 7.42 | 10.55    | 15.57 | 19.03 | 26.24 | 29.62 | 37.13 |
| 13          | 0.055                              | 0.365 | 6.08 | 7.2  | 7.88 | 9.9   | 11.33 | 14.51    | 18.54 | 21.11 | 26.22                            | 28.49 | 33.31 | -0.268 | 0.499 | 4.08 | 4.66 | 5.03 | 6.28 | 7.35 | 10.46    | 15.44 | 18.86 | 26.03 | 29.4  | 36.88 |
| 13.5        | 0.072                              | 0.364 | 6.25 | 7.42 | 8.12 | 10.22 | 11.69 | 14.97    | 19.09 | 21.71 | 26.89                            | 29.19 | 34.03 | -0.268 | 0.498 | 4.03 | 4.6  | 4.97 | 6.21 | 7.26 | 10.33    | 15.24 | 18.62 | 25.7  | 29.03 | 36.43 |
| 14          | 0.088                              | 0.363 | 6.39 | 7.6  | 8.32 | 10.49 | 12    | 15.38    | 19.59 | 22.26 | 27.52                            | 29.84 | 34.72 | -0.268 | 0.497 | 3.98 | 4.54 | 4.9  | 6.13 | 7.17 | 10.18    | 15    | 18.32 | 25.27 | 28.54 | 35.82 |
| 14.5        | 0.104                              | 0.363 | 6.49 | 7.74 | 8.49 | 10.71 | 12.27 | 15.73    | 20.04 | 22.76 | 28.1                             | 30.45 | 35.38 | -0.268 | 0.495 | 3.93 | 4.48 | 4.84 | 6.05 | 7.07 | 10.02    | 14.73 | 17.97 | 24.76 | 27.96 | 35.08 |
| 15          | 0.118                              | 0.365 | 6.56 | 7.84 | 8.61 | 10.89 | 12.49 | 16.04    | 20.44 | 23.21 | 28.63                            | 31.01 | 35.99 | -0.267 | 0.492 | 3.88 | 4.43 | 4.78 | 5.97 | 6.97 | 9.85     | 14.44 | 17.59 | 24.2  | 27.3  | 34.23 |
| 15.5        | 0.132                              | 0.366 | 6.6  | 7.91 | 8.7  | 11.04 | 12.67 | 16.29    | 20.78 | 23.61 | 29.1                             | 31.52 | 36.56 | -0.267 | 0.488 | 3.83 | 4.37 | 4.72 | 5.89 | 6.87 | 9.68     | 14.12 | 17.18 | 23.58 | 26.58 | 33.29 |
| 16          | 0.144                              | 0.369 | 6.61 | 7.95 | 8.75 | 11.14 | 12.82 | 16.51    | 21.08 | 23.96 | 29.54                            | 31.98 | 37.08 | -0.267 | 0.482 | 3.79 | 4.32 | 4.66 | 5.81 | 6.77 | 9.51     | 13.81 | 16.75 | 22.92 | 25.81 | 32.27 |
| 16.5        | 0.157                              | 0.372 | 6.59 | 7.96 | 8.78 | 11.22 | 12.93 | 16.7     | 21.35 | 24.27 | 29.93                            | 32.41 | 37.56 | -0.267 | 0.477 | 3.75 | 4.28 | 4.62 | 5.74 | 6.68 | 9.33     | 13.48 | 16.32 | 22.24 | 25.02 | 31.2  |
| 17          | 0.168                              | 0.375 | 6.57 | 7.96 | 8.79 | 11.28 | 13.01 | 16.85    | 21.58 | 24.54 | 30.28                            | 32.79 | 38    | -0.267 | 0.47  | 3.72 | 4.24 | 4.57 | 5.68 | 6.59 | 9.17     | 13.16 | 15.89 | 21.56 | 24.22 | 30.12 |
| 17.5        | 0.179                              | 0.378 | 6.52 | 7.94 | 8.79 | 11.31 | 13.08 | 16.98    | 21.79 | 24.79 | 30.61                            | 33.15 | 38.41 | -0.267 | 0.464 | 3.69 | 4.2  | 4.53 | 5.61 | 6.5  | 9        | 12.85 | 15.47 | 20.9  | 23.44 | 29.08 |
| 18          | 0.19                               | 0.381 | 6.47 | 7.91 | 8.77 | 11.34 | 13.13 | 17.09    | 21.97 | 25.02 | 30.91                            | 33.48 | 38.8  | -0.267 | 0.457 | 3.66 | 4.17 | 4.49 | 5.55 | 6.42 | 8.85     | 12.56 | 15.07 | 20.28 | 22.7  | 28.08 |

Supplementary Table 8. Smoothed percentiles for sum of skinfold thickness (mean triceps + mean calf), for female and male 5 to 18 years.

| Age (years) | Sum of skinfolds (triceps + calf) (mm) |       |       |       |       |       |       |          |       |       |       |       |                                  |        |       |      |       |       |       |       |          |       |       |       |       |       |
|-------------|----------------------------------------|-------|-------|-------|-------|-------|-------|----------|-------|-------|-------|-------|----------------------------------|--------|-------|------|-------|-------|-------|-------|----------|-------|-------|-------|-------|-------|
|             | Female LMS parameters and centiles     |       |       |       |       |       |       |          |       |       |       |       | Male LMS parameters and centiles |        |       |      |       |       |       |       |          |       |       |       |       |       |
|             | L                                      | S     | 1th   | 3th   | 5th   | 15th  | 25th  | 50th (M) | 75th  | 85th  | 95th  | 97th  | 99th                             | L      | S     | 1th  | 3th   | 5th   | 15th  | 25th  | 50th (M) | 75th  | 85th  | 95th  | 97th  | 99th  |
| 5           | -0.897                                 | 0.204 | 11.92 | 12.73 | 13.21 | 14.59 | 15.56 | 17.72    | 20.53 | 22.41 | 26.44 | 28.4  | 32.95                            | -0.443 | 0.221 | 9.51 | 10.17 | 10.56 | 11.76 | 12.64 | 14.76    | 17.43 | 19    | 21.86 | 23.05 | 25.46 |
| 5.5         | -0.765                                 | 0.227 | 11.63 | 12.53 | 13.05 | 14.6  | 15.68 | 18.11    | 21.31 | 23.46 | 28.09 | 30.33 | 35.56                            | -0.432 | 0.245 | 9.47 | 10.18 | 10.61 | 11.93 | 12.91 | 15.32    | 18.43 | 20.29 | 23.73 | 25.18 | 28.16 |
| 6           | -0.652                                 | 0.247 | 11.37 | 12.35 | 12.92 | 14.62 | 15.81 | 18.52    | 22.08 | 24.49 | 29.65 | 32.16 | 37.97                            | -0.421 | 0.268 | 9.44 | 10.21 | 10.67 | 12.12 | 13.21 | 15.93    | 19.52 | 21.7  | 25.8  | 27.55 | 31.19 |
| 6.5         | -0.554                                 | 0.27  | 11.03 | 12.08 | 12.71 | 14.57 | 15.89 | 18.9     | 22.89 | 25.6  | 31.44 | 34.28 | 40.85                            | -0.412 | 0.291 | 9.45 | 10.28 | 10.78 | 12.36 | 13.56 | 16.62    | 20.74 | 23.28 | 28.14 | 30.25 | 34.68 |
| 7           | -0.468                                 | 0.299 | 10.58 | 11.73 | 12.41 | 14.46 | 15.93 | 19.31    | 23.85 | 26.97 | 33.73 | 37.03 | 44.71                            | -0.403 | 0.313 | 9.5  | 10.38 | 10.92 | 12.63 | 13.96 | 17.37    | 22.08 | 25.03 | 30.76 | 33.29 | 38.64 |
| 7.5         | -0.391                                 | 0.329 | 10.14 | 11.38 | 12.12 | 14.38 | 16    | 19.79    | 24.95 | 28.52 | 36.32 | 40.15 | 49.08                            | -0.395 | 0.335 | 9.54 | 10.48 | 11.06 | 12.91 | 14.35 | 18.13    | 23.46 | 26.85 | 33.54 | 36.53 | 42.94 |
| 8           | -0.323                                 | 0.353 | 9.84  | 11.17 | 11.97 | 14.42 | 16.2  | 20.37    | 26.1  | 30.06 | 38.73 | 42.98 | 52.86                            | -0.388 | 0.356 | 9.58 | 10.57 | 11.19 | 13.16 | 14.72 | 18.86    | 24.81 | 28.66 | 36.35 | 39.83 | 47.37 |
| 8.5         | -0.263                                 | 0.367 | 9.75  | 11.17 | 12.03 | 14.66 | 16.57 | 21.06    | 27.2  | 31.44 | 40.63 | 45.09 | 55.36                            | -0.381 | 0.374 | 9.62 | 10.65 | 11.3  | 13.39 | 15.06 | 19.54    | 26.09 | 30.39 | 39.08 | 43.06 | 51.76 |
| 9           | -0.207                                 | 0.371 | 9.88  | 11.39 | 12.3  | 15.1  | 17.13 | 21.86    | 28.27 | 32.65 | 42    | 46.48 | 56.62                            | -0.374 | 0.391 | 9.64 | 10.72 | 11.39 | 13.59 | 15.36 | 20.15    | 27.26 | 31.98 | 41.62 | 46.07 | 55.9  |
| 9.5         | -0.157                                 | 0.367 | 10.22 | 11.82 | 12.79 | 15.74 | 17.86 | 22.77    | 29.31 | 33.7  | 42.93 | 47.28 | 56.95                            | -0.368 | 0.404 | 9.66 | 10.77 | 11.46 | 13.75 | 15.6  | 20.66    | 28.27 | 33.36 | 43.85 | 48.74 | 59.58 |
| 10          | -0.112                                 | 0.357 | 10.72 | 12.42 | 13.44 | 16.52 | 18.72 | 23.74    | 30.31 | 34.65 | 43.6  | 47.74 | 56.8                             | -0.362 | 0.415 | 9.66 | 10.79 | 11.51 | 13.86 | 15.78 | 21.06    | 29.08 | 34.48 | 45.7  | 50.95 | 62.65 |
| 10.5        | -0.07                                  | 0.345 | 11.33 | 13.11 | 14.18 | 17.38 | 19.64 | 24.75    | 31.3  | 35.56 | 44.18 | 48.1  | 56.56                            | -0.356 | 0.424 | 9.63 | 10.79 | 11.52 | 13.92 | 15.89 | 21.34    | 29.68 | 35.33 | 47.1  | 52.63 | 64.99 |
| 11          | -0.031                                 | 0.333 | 11.97 | 13.85 | 14.96 | 18.27 | 20.59 | 25.76    | 32.28 | 36.46 | 44.79 | 48.52 | 56.48                            | -0.35  | 0.431 | 9.58 | 10.75 | 11.48 | 13.92 | 15.92 | 21.49    | 30.05 | 35.87 | 48.03 | 53.75 | 66.56 |
| 11.5        | 0.005                                  | 0.323 | 12.62 | 14.58 | 15.74 | 19.16 | 21.54 | 26.79    | 33.3  | 37.42 | 45.53 | 49.12 | 56.7                             | -0.345 | 0.436 | 9.5  | 10.67 | 11.41 | 13.86 | 15.88 | 21.51    | 30.21 | 36.13 | 48.51 | 54.35 | 67.42 |
| 12          | 0.038                                  | 0.314 | 13.24 | 15.29 | 16.49 | 20.03 | 22.47 | 27.81    | 34.35 | 38.44 | 46.41 | 49.91 | 57.22                            | -0.34  | 0.44  | 9.4  | 10.56 | 11.3  | 13.75 | 15.77 | 21.43    | 30.19 | 36.15 | 48.62 | 54.5  | 67.65 |
| 12.5        | 0.069                                  | 0.308 | 13.82 | 15.95 | 17.2  | 20.86 | 23.37 | 28.81    | 35.41 | 39.5  | 47.4  | 50.84 | 57.98                            | -0.335 | 0.442 | 9.28 | 10.44 | 11.17 | 13.61 | 15.63 | 21.28    | 30.03 | 35.98 | 48.43 | 54.29 | 67.39 |
| 13          | 0.097                                  | 0.303 | 14.33 | 16.55 | 17.85 | 21.63 | 24.21 | 29.77    | 36.45 | 40.58 | 48.46 | 51.87 | 58.91                            | -0.331 | 0.443 | 9.17 | 10.32 | 11.05 | 13.47 | 15.46 | 21.08    | 29.78 | 35.69 | 48.02 | 53.81 | 66.74 |
| 13.5        |                                        |       |       |       |       |       |       |          |       |       |       |       |                                  |        |       |      |       |       |       |       |          |       |       |       |       |       |

Supplementary Table 9. Smoothed percentiles for mid-upper right arm circumference (MUAC), for female and male 5 to 18 years.

| Age (years) | Right mid-upper arm circumference (cm) |       |       |       |       |       |       |          |       |       |                                  |       |       |        |       |       |       |       |       |       |          |       |       |       |       |       |
|-------------|----------------------------------------|-------|-------|-------|-------|-------|-------|----------|-------|-------|----------------------------------|-------|-------|--------|-------|-------|-------|-------|-------|-------|----------|-------|-------|-------|-------|-------|
|             | Female LMS parameters and centiles     |       |       |       |       |       |       |          |       |       | Male LMS parameters and centiles |       |       |        |       |       |       |       |       |       |          |       |       |       |       |       |
|             | L                                      | S     | 1th   | 3th   | 5th   | 15th  | 25th  | 50th (M) | 75th  | 85th  | 95th                             | 97th  | 99th  | L      | S     | 1th   | 3th   | 5th   | 15th  | 25th  | 50th (M) | 75th  | 85th  | 95th  | 97th  | 99th  |
| 5           | -2.651                                 | 0.082 | 14.19 | 14.55 | 14.76 | 15.34 | 15.73 | 16.57    | 17.6  | 18.26 | 19.6                             | 20.23 | 21.66 | -2.043 | 0.067 | 13.88 | 14.21 | 14.39 | 14.89 | 15.22 | 15.88    | 16.65 | 17.11 | 17.99 | 18.36 | 19.15 |
| 5.5         | -2.5                                   | 0.087 | 14.54 | 14.93 | 15.15 | 15.79 | 16.21 | 17.12    | 18.24 | 18.96 | 20.44                            | 21.13 | 22.69 | -1.867 | 0.076 | 14.11 | 14.49 | 14.7  | 15.28 | 15.66 | 16.46    | 17.37 | 17.93 | 18.99 | 19.45 | 20.42 |
| 6           | -2.362                                 | 0.091 | 14.81 | 15.23 | 15.47 | 16.15 | 16.61 | 17.59    | 18.8  | 19.58 | 21.18                            | 21.93 | 23.64 | -1.707 | 0.086 | 14.32 | 14.74 | 14.98 | 15.65 | 16.08 | 17       | 18.06 | 18.72 | 19.97 | 20.53 | 21.69 |
| 6.5         | -2.236                                 | 0.096 | 14.98 | 15.43 | 15.68 | 16.41 | 16.91 | 17.96    | 19.27 | 20.11 | 21.85                            | 22.67 | 24.52 | -1.559 | 0.094 | 14.5  | 14.98 | 15.24 | 15.99 | 16.48 | 17.51    | 18.73 | 19.47 | 20.92 | 21.55 | 22.9  |
| 7           | -2.118                                 | 0.102 | 15.09 | 15.57 | 15.84 | 16.62 | 17.15 | 18.29    | 19.69 | 20.6  | 22.49                            | 23.37 | 25.4  | -1.422 | 0.102 | 14.67 | 15.19 | 15.49 | 16.32 | 16.86 | 18.01    | 19.37 | 20.2  | 21.83 | 22.55 | 24.08 |
| 7.5         | -2.009                                 | 0.107 | 15.19 | 15.69 | 15.98 | 16.82 | 17.38 | 18.59    | 20.1  | 21.08 | 23.12                            | 24.08 | 26.29 | -1.295 | 0.11  | 14.82 | 15.39 | 15.71 | 16.62 | 17.22 | 18.49    | 19.99 | 20.92 | 22.73 | 23.54 | 25.25 |
| 8           | -1.907                                 | 0.112 | 15.29 | 15.83 | 16.14 | 17.02 | 17.61 | 18.91    | 20.52 | 21.57 | 23.75                            | 24.78 | 27.15 | -1.176 | 0.118 | 14.95 | 15.57 | 15.93 | 16.92 | 17.58 | 18.96    | 20.61 | 21.63 | 23.62 | 24.5  | 26.39 |
| 8.5         | -1.811                                 | 0.117 | 15.45 | 16.01 | 16.34 | 17.27 | 17.9  | 19.26    | 20.97 | 22.08 | 24.39                            | 25.48 | 27.99 | -1.064 | 0.125 | 15.08 | 15.75 | 16.13 | 17.21 | 17.92 | 19.42    | 21.21 | 22.32 | 24.49 | 25.45 | 27.49 |
| 9           | -1.721                                 | 0.12  | 15.66 | 16.25 | 16.59 | 17.57 | 18.24 | 19.67    | 21.47 | 22.63 | 25.05                            | 26.19 | 28.8  | -0.958 | 0.131 | 15.21 | 15.93 | 16.34 | 17.49 | 18.26 | 19.88    | 21.81 | 23    | 25.32 | 26.35 | 28.53 |
| 9.5         | -1.635                                 | 0.123 | 15.92 | 16.54 | 16.9  | 17.93 | 18.62 | 20.13    | 22    | 23.22 | 25.73                            | 26.91 | 29.59 | -0.858 | 0.137 | 15.35 | 16.12 | 16.56 | 17.79 | 18.61 | 20.33    | 22.38 | 23.65 | 26.1  | 27.18 | 29.47 |
| 10          | -1.554                                 | 0.125 | 16.22 | 16.87 | 17.24 | 18.32 | 19.04 | 20.61    | 22.55 | 23.81 | 26.39                            | 27.6  | 30.33 | -0.764 | 0.14  | 15.53 | 16.34 | 16.8  | 18.11 | 18.97 | 20.78    | 22.93 | 24.25 | 26.79 | 27.91 | 30.26 |
| 10.5        | -1.477                                 | 0.126 | 16.54 | 17.22 | 17.61 | 18.73 | 19.48 | 21.1     | 23.11 | 24.4  | 27.03                            | 28.25 | 30.98 | -0.674 | 0.143 | 15.74 | 16.59 | 17.08 | 18.44 | 19.34 | 21.23    | 23.45 | 24.81 | 27.41 | 28.54 | 30.9  |
| 11          | -1.404                                 | 0.126 | 16.91 | 17.62 | 18.02 | 19.18 | 19.95 | 21.62    | 23.68 | 24.99 | 27.64                            | 28.86 | 31.57 | -0.588 | 0.143 | 15.99 | 16.88 | 17.38 | 18.8  | 19.73 | 21.68    | 23.95 | 25.32 | 27.94 | 29.07 | 31.42 |
| 11.5        | -1.333                                 | 0.126 | 17.33 | 18.06 | 18.48 | 19.67 | 20.47 | 22.18    | 24.26 | 25.59 | 28.24                            | 29.45 | 32.11 | -0.506 | 0.143 | 16.27 | 17.2  | 17.72 | 19.18 | 20.14 | 22.12    | 24.42 | 25.8  | 28.4  | 29.52 | 31.82 |
| 12          | -1.266                                 | 0.124 | 17.79 | 18.55 | 18.98 | 20.2  | 21.02 | 22.76    | 24.87 | 26.2  | 28.83                            | 30.03 | 32.62 | -0.427 | 0.141 | 16.6  | 17.55 | 18.08 | 19.58 | 20.55 | 22.56    | 24.86 | 26.24 | 28.81 | 29.9  | 32.13 |
| 12.5        | -1.201                                 | 0.122 | 18.28 | 19.06 | 19.5  | 20.76 | 21.59 | 23.35    | 25.47 | 26.8  | 29.4                             | 30.57 | 33.08 | -0.352 | 0.138 | 16.96 | 17.94 | 18.48 | 20    | 20.99 | 23       | 25.29 | 26.65 | 29.16 | 30.22 | 32.37 |
| 13          | -1.139                                 | 0.12  | 18.77 | 19.57 | 20.02 | 21.29 | 22.14 | 23.92    | 26.04 | 27.35 | 29.91                            | 31.05 | 33.47 | -0.279 | 0.135 | 17.36 | 18.36 | 18.91 | 20.44 | 21.43 | 23.44    | 25.7  | 27.03 | 29.47 | 30.49 | 32.54 |
| 13.5        | -1.08                                  | 0.118 | 19.23 | 20.04 | 20.5  | 21.79 | 22.64 | 24.44    | 26.55 | 27.85 | 30.36                            | 31.47 | 33.8  | -0.21  | 0.13  | 17.8  | 18.8  | 19.36 | 20.9  | 21.89 | 23.89    | 26.1  | 27.4  | 29.75 | 30.73 | 32.68 |
| 14          | -1.022                                 | 0.115 | 19.64 | 20.46 | 20.93 | 22.24 | 23.1  | 24.89    | 26.99 | 28.28 | 30.74                            | 31.81 | 34.06 | -0.143 | 0.126 | 18.25 | 19.26 | 19.83 | 21.37 | 22.35 | 24.33    | 26.5  | 27.76 | 30.03 | 30.97 | 32.83 |
| 14.5        | -0.967                                 | 0.113 | 20    | 20.84 | 21.31 | 22.63 | 23.49 | 25.29    | 27.37 | 28.64 | 31.04                            | 32.09 | 34.26 | -0.078 | 0.122 | 18.7  | 19.72 | 20.29 | 21.83 | 22.81 | 24.76    | 26.9  | 28.12 | 30.32 | 31.22 | 33    |
| 15          | -0.913                                 | 0.111 | 20.32 | 21.16 | 21.64 | 22.97 | 23.83 | 25.62    | 27.69 | 28.94 | 31.29                            | 32.31 | 34.4  | -0.015 | 0.118 | 19.14 | 20.17 | 20.74 | 22.29 | 23.26 | 25.2     | 27.3  | 28.49 | 30.63 | 31.5  | 33.21 |
| 15.5        | -0.861                                 | 0.109 | 20.58 | 21.44 | 21.91 | 23.25 | 24.11 | 25.9     | 27.95 | 29.17 | 31.48                            | 32.47 | 34.5  | 0.045  | 0.115 | 19.57 | 20.61 | 21.18 | 22.73 | 23.71 | 25.63    | 27.7  | 28.88 | 30.96 | 31.81 | 33.46 |
| 16          | -0.811                                 | 0.108 | 20.8  | 21.66 | 22.14 | 23.47 | 24.34 | 26.12    | 28.15 | 29.35 | 31.61                            | 32.57 | 34.54 | 0.104  | 0.113 | 19.97 | 21.03 | 21.6  | 23.17 | 24.14 | 26.06    | 28.11 | 29.27 | 31.32 | 32.15 | 33.76 |
| 16.5        | -0.762                                 | 0.106 | 20.96 | 21.83 | 22.31 | 23.65 | 24.51 | 26.28    | 28.28 | 29.47 | 31.68                            | 32.61 | 34.52 | 0.161  | 0.111 | 20.35 | 21.42 | 22.01 | 23.58 | 24.56 | 26.48    | 28.53 | 29.68 | 31.7  | 32.51 | 34.1  |
| 17          | -0.715                                 | 0.104 | 21.08 | 21.95 | 22.43 | 23.76 | 24.62 | 26.37    | 28.35 | 29.52 | 31.68                            | 32.59 | 34.44 | 0.216  | 0.11  | 20.7  | 21.79 | 22.39 | 23.98 | 24.97 | 26.9     | 28.95 | 30.09 | 32.1  | 32.91 | 34.47 |
| 17.5        | -0.669                                 | 0.103 | 21.16 | 22.02 | 22.5  | 23.83 | 24.68 | 26.42    | 28.37 | 29.51 | 31.62                            | 32.51 | 34.3  | 0.27   | 0.109 | 21.03 | 22.14 | 22.75 | 24.37 | 25.37 | 27.32    | 29.37 | 30.52 | 32.52 | 33.32 | 34.88 |
| 18          | -0.625                                 | 0.102 | 21.2  | 22.06 | 22.54 | 23.86 | 24.71 | 26.42    | 28.34 | 29.46 | 31.52                            | 32.39 | 34.12 | 0.322  | 0.108 | 21.34 | 22.47 | 23.09 | 24.74 | 25.76 | 27.73    | 29.79 | 30.95 | 32.95 | 33.75 | 35.3  |

Supplementary Table 10. Smoothed percentiles for girth right thigh, for female and male 5 to 18 years.

| Age (years) | Right thigh circumference (cm)     |       |       |       |       |       |       |          |       |       |                                  |       |       |        |       |       |       |       |       |       |          |       |       |       |       |       |
|-------------|------------------------------------|-------|-------|-------|-------|-------|-------|----------|-------|-------|----------------------------------|-------|-------|--------|-------|-------|-------|-------|-------|-------|----------|-------|-------|-------|-------|-------|
|             | Female LMS parameters and centiles |       |       |       |       |       |       |          |       |       | Male LMS parameters and centiles |       |       |        |       |       |       |       |       |       |          |       |       |       |       |       |
|             | L                                  | S     | 1th   | 3th   | 5th   | 15th  | 25th  | 50th (M) | 75th  | 85th  | 95th                             | 97th  | 99th  | L      | S     | 1th   | 3th   | 5th   | 15th  | 25th  | 50th (M) | 75th  | 85th  | 95th  | 97th  | 99th  |
| 5           | -2.572                             | 0.089 | 26.49 | 27.21 | 27.62 | 28.79 | 29.58 | 31.28    | 33.39 | 34.76 | 37.6                             | 38.95 | 42.06 | -0.952 | 0.08  | 25.36 | 26.15 | 26.59 | 27.79 | 28.56 | 30.1     | 31.82 | 32.82 | 34.65 | 35.42 | 36.95 |
| 5.5         | -2.353                             | 0.088 | 27.43 | 28.19 | 28.62 | 29.84 | 30.66 | 32.4     | 34.53 | 35.89 | 38.64                            | 39.92 | 42.78 | -0.826 | 0.084 | 26.11 | 26.97 | 27.45 | 28.77 | 29.61 | 31.3     | 33.17 | 34.26 | 36.25 | 37.07 | 38.74 |
| 6           | -2.153                             | 0.087 | 28.27 | 29.06 | 29.51 | 30.79 | 31.64 | 33.43    | 35.59 | 36.95 | 39.66                            | 40.89 | 43.59 | -0.71  | 0.088 | 26.77 | 27.72 | 28.25 | 29.68 | 30.59 | 32.43    | 34.46 | 35.64 | 37.79 | 38.69 | 40.48 |
| 6.5         | -1.97                              | 0.088 | 28.94 | 29.78 | 30.25 | 31.59 | 32.48 | 34.35    | 36.57 | 37.96 | 40.69                            | 41.92 | 44.58 | -0.604 | 0.093 | 27.36 | 28.39 | 28.96 | 30.52 | 31.51 | 33.51    | 35.71 | 36.99 | 39.32 | 40.28 | 42.21 |
| 7           | -1.8                               | 0.09  | 29.44 | 30.34 | 30.85 | 32.27 | 33.21 | 35.19    | 37.54 | 38.99 | 41.83                            | 43.1  | 45.83 | -0.505 | 0.098 | 27.86 | 28.98 | 29.6  | 31.3  | 32.37 | 34.54    | 36.93 | 38.32 | 40.83 | 41.87 | 43.95 |
| 7.5         | -1.641                             | 0.095 | 29.83 | 30.79 | 31.34 | 32.87 | 33.88 | 36       | 38.51 | 40.06 | 43.09                            | 44.44 | 47.31 | -0.414 | 0.103 | 28.29 | 29.5  | 30.17 | 32.01 | 33.18 | 35.53    | 38.12 | 39.62 | 42.33 | 43.46 | 45.7  |
| 8           | -1.493                             | 0.1   | 30.14 | 31.18 | 31.76 | 33.41 | 34.5  | 36.79    | 39.49 | 41.16 | 44.41                            | 45.85 | 48.93 | -0.328 | 0.108 | 28.67 | 29.98 | 30.71 | 32.69 | 33.95 | 36.48    | 39.26 | 40.87 | 43.78 | 44.99 | 47.38 |
| 8.5         | -1.354                             | 0.105 | 30.44 | 31.55 | 32.19 | 33.96 | 35.14 | 37.6     | 40.51 | 42.3  | 45.78                            | 47.33 | 50.6  | -0.248 | 0.112 | 29.05 | 30.45 | 31.23 | 33.35 | 34.7  | 37.4     | 40.36 | 42.07 | 45.16 | 46.44 | 48.96 |
| 9           | -1.223                             | 0.11  | 30.77 | 31.97 | 32.65 | 34.56 | 35.82 | 38.46    | 41.58 | 43.49 | 47.21                            | 48.84 | 52.31 | -0.172 | 0.115 | 29.44 | 30.93 | 31.76 | 34.01 | 35.43 | 38.28    | 41.41 | 43.21 | 46.44 | 47.77 | 50.41 |
| 9.5         | -1.099                             | 0.115 | 31.15 | 32.44 | 33.17 | 35.21 | 36.55 | 39.38    | 42.69 | 44.73 | 48.66                            | 50.38 | 54.02 | -0.1   | 0.118 | 29.88 | 31.44 | 32.31 | 34.67 | 36.17 | 39.14    | 42.39 | 44.26 | 47.6  | 48.97 | 51.67 |
| 10          | -0.981                             | 0.119 | 31.58 | 32.95 | 33.73 | 35.9  | 37.33 | 40.33    | 43.84 | 45.98 | 50.09                            | 51.89 | 55.66 | -0.032 | 0.119 | 30.37 | 32    | 32.91 | 35.36 | 36.9  | 39.98    | 43.31 | 45.22 | 48.63 | 50.02 | 52.76 |
| 10.5        | -0.869                             | 0.122 | 32.06 | 33.51 | 34.33 | 36.64 | 38.15 | 41.3     | 44.97 | 47.2  | 51.46                            | 53.31 | 57.17 | 0.033  | 0.119 | 30.91 | 32.6  | 33.53 | 36.06 | 37.65 | 40.79    | 44.18 | 46.11 | 49.54 | 50.94 | 53.68 |
| 11          | -0.762                             | 0.123 | 32.66 | 34.19 | 35.06 | 37.47 | 39.05 | 42.33    | 46.13 | 48.43 | 52.77                            | 54.65 | 58.52 | 0.095  | 0.118 | 31.5  | 33.24 | 34.19 | 36.77 | 38.39 | 41.57    | 44.99 | 46.93 | 50.37 | 51.76 | 54.48 |
| 11.5        | -0.66                              | 0.123 | 33.43 | 35.04 | 35.94 | 38.45 | 40.09 | 43.47    | 47.35 | 49.67 | 54.03                            | 55.9  | 59.73 | 0.154  | 0.116 | 32.12 | 33.89 | 34.87 | 37.49 | 39.13 | 42.34    | 45.77 | 47.71 | 51.12 | 52.5  | 55.18 |
| 12          | -0.563                             | 0.121 | 34.39 | 36.05 | 36.99 | 39.57 | 41.25 | 44.69    | 48.59 | 50.91 | 55.22                            | 57.05 | 60.77 | 0.21   | 0.114 | 32.76 | 34.57 | 35.56 | 38.21 | 39.86 | 43.08    | 46.51 | 48.44 | 51.81 | 53.15 | 55.82 |
| 12.5        | -0.469                             | 0.118 | 35.46 | 37.17 | 38.13 | 40.77 | 42.47 | 45.93    | 49.81 | 52.1  | 56.31                            | 58.08 | 61.65 | 0.264  | 0.112 | 33.43 | 35.26 | 36.26 | 38.93 | 40.59 | 43.81    | 47.22 | 49.13 | 52.46 | 53.79 | 56.39 |
| 13          | -0.379</                           |       |       |       |       |       |       |          |       |       |                                  |       |       |        |       |       |       |       |       |       |          |       |       |       |       |       |



Supplementary Table 11. Smoothed percentiles for girth right calf, for female and male 5 to 18 years.

| Age (years) | Right calf circumference (cm)      |       |       |       |       |       |       |          |       |       |                                  |       |       |        |       |       |       |       |       |       |          |       |       |       |       |       |
|-------------|------------------------------------|-------|-------|-------|-------|-------|-------|----------|-------|-------|----------------------------------|-------|-------|--------|-------|-------|-------|-------|-------|-------|----------|-------|-------|-------|-------|-------|
|             | Female LMS parameters and centiles |       |       |       |       |       |       |          |       |       | Male LMS parameters and centiles |       |       |        |       |       |       |       |       |       |          |       |       |       |       |       |
|             | L                                  | S     | 1th   | 3th   | 5th   | 15th  | 25th  | 50th (M) | 75th  | 85th  | 95th                             | 97th  | 99th  | L      | S     | 1th   | 3th   | 5th   | 15th  | 25th  | 50th (M) | 75th  | 85th  | 95th  | 97th  | 99th  |
| 5           | -2.768                             | 0.067 | 19.36 | 19.79 | 20.02 | 20.69 | 21.12 | 22.04    | 23.13 | 23.81 | 25.14                            | 25.73 | 27.02 | -1.624 | 0.062 | 19.07 | 19.51 | 19.75 | 20.42 | 20.85 | 21.71    | 22.67 | 23.24 | 24.28 | 24.71 | 25.6  |
| 5.5         | -2.65                              | 0.069 | 19.82 | 20.26 | 20.51 | 21.21 | 21.68 | 22.65    | 23.8  | 24.52 | 25.92                            | 26.55 | 27.91 | -1.489 | 0.067 | 19.44 | 19.93 | 20.2  | 20.94 | 21.41 | 22.37    | 23.44 | 24.07 | 25.23 | 25.72 | 26.71 |
| 6           | -2.543                             | 0.071 | 20.16 | 20.63 | 20.89 | 21.64 | 22.13 | 23.15    | 24.37 | 25.13 | 26.61                            | 27.28 | 28.72 | -1.366 | 0.072 | 19.78 | 20.32 | 20.61 | 21.43 | 21.95 | 23.01    | 24.19 | 24.89 | 26.18 | 26.73 | 27.83 |
| 6.5         | -2.444                             | 0.075 | 20.38 | 20.88 | 21.16 | 21.95 | 22.47 | 23.56    | 24.87 | 25.68 | 27.29                            | 28.01 | 29.57 | -1.253 | 0.077 | 20.1  | 20.68 | 21.01 | 21.9  | 22.47 | 23.64    | 24.94 | 25.72 | 27.14 | 27.75 | 28.97 |
| 7           | -2.353                             | 0.08  | 20.57 | 21.1  | 21.4  | 22.25 | 22.81 | 24       | 25.42 | 26.31 | 28.08                            | 28.88 | 30.64 | -1.148 | 0.083 | 20.4  | 21.03 | 21.39 | 22.36 | 22.99 | 24.27    | 25.71 | 26.56 | 28.14 | 28.81 | 30.16 |
| 7.5         | -2.268                             | 0.086 | 20.79 | 21.36 | 21.68 | 22.6  | 23.21 | 24.5     | 26.06 | 27.05 | 29.02                            | 29.93 | 31.92 | -1.05  | 0.088 | 20.68 | 21.37 | 21.76 | 22.82 | 23.51 | 24.91    | 26.49 | 27.43 | 29.17 | 29.9  | 31.4  |
| 8           | -2.188                             | 0.091 | 21.05 | 21.66 | 22    | 22.99 | 23.64 | 25.04    | 26.75 | 27.83 | 30.02                            | 31.03 | 33.28 | -0.958 | 0.094 | 20.97 | 21.72 | 22.13 | 23.29 | 24.04 | 25.56    | 27.28 | 28.3  | 30.2  | 31    | 32.64 |
| 8.5         | -2.114                             | 0.096 | 21.34 | 21.99 | 22.35 | 23.4  | 24.11 | 25.61    | 27.45 | 28.63 | 31.02                            | 32.13 | 34.61 | -0.873 | 0.098 | 21.27 | 22.08 | 22.53 | 23.77 | 24.57 | 26.21    | 28.07 | 29.16 | 31.21 | 32.07 | 33.83 |
| 9           | -2.043                             | 0.1   | 21.68 | 22.36 | 22.75 | 23.86 | 24.61 | 26.21    | 28.17 | 29.43 | 31.99                            | 33.19 | 35.87 | -0.792 | 0.102 | 21.61 | 22.47 | 22.95 | 24.27 | 25.12 | 26.86    | 28.83 | 30    | 32.16 | 33.07 | 34.93 |
| 9.5         | -1.976                             | 0.103 | 22.08 | 22.8  | 23.21 | 24.38 | 25.16 | 26.85    | 28.92 | 30.25 | 32.96                            | 34.23 | 37.07 | -0.715 | 0.104 | 21.99 | 22.89 | 23.39 | 24.78 | 25.68 | 27.51    | 29.57 | 30.79 | 33.04 | 33.99 | 35.92 |
| 10          | -1.913                             | 0.105 | 22.53 | 23.29 | 23.71 | 24.93 | 25.75 | 27.51    | 29.68 | 31.07 | 33.89                            | 35.21 | 38.16 | -0.642 | 0.106 | 22.4  | 23.34 | 23.87 | 25.32 | 26.25 | 28.15    | 30.28 | 31.54 | 33.85 | 34.82 | 36.79 |
| 10.5        | -1.853                             | 0.106 | 23.03 | 23.81 | 24.25 | 25.52 | 26.37 | 28.19    | 30.43 | 31.86 | 34.76                            | 36.11 | 39.12 | -0.573 | 0.106 | 22.84 | 23.82 | 24.36 | 25.86 | 26.83 | 28.78    | 30.96 | 32.24 | 34.59 | 35.58 | 37.56 |
| 11          | -1.796                             | 0.105 | 23.57 | 24.38 | 24.84 | 26.14 | 27.01 | 28.88    | 31.17 | 32.62 | 35.55                            | 36.9  | 39.9  | -0.507 | 0.106 | 23.3  | 24.31 | 24.87 | 26.41 | 27.4  | 29.39    | 31.6  | 32.9  | 35.26 | 36.25 | 38.23 |
| 11.5        | -1.741                             | 0.104 | 24.19 | 25.02 | 25.49 | 26.82 | 27.7  | 29.6     | 31.89 | 33.34 | 36.25                            | 37.58 | 40.5  | -0.444 | 0.105 | 23.77 | 24.81 | 25.38 | 26.95 | 27.95 | 29.97    | 32.2  | 33.5  | 35.86 | 36.84 | 38.8  |
| 12          | -1.688                             | 0.101 | 24.87 | 25.71 | 26.19 | 27.53 | 28.43 | 30.32    | 32.6  | 34.03 | 36.86                            | 38.14 | 40.92 | -0.384 | 0.103 | 24.25 | 25.3  | 25.89 | 27.48 | 28.49 | 30.52    | 32.76 | 34.05 | 36.39 | 37.36 | 39.28 |
| 12.5        | -1.638                             | 0.098 | 25.58 | 26.42 | 26.9  | 28.25 | 29.14 | 31.02    | 33.25 | 34.64 | 37.36                            | 38.58 | 41.19 | -0.326 | 0.101 | 24.74 | 25.8  | 26.39 | 28    | 29.02 | 31.05    | 33.27 | 34.55 | 36.85 | 37.8  | 39.68 |
| 13          | -1.59                              | 0.094 | 26.26 | 27.11 | 27.59 | 28.93 | 29.81 | 31.66    | 33.83 | 35.17 | 37.77                            | 38.91 | 41.35 | -0.271 | 0.099 | 25.23 | 26.3  | 26.9  | 28.51 | 29.52 | 31.54    | 33.74 | 35    | 37.25 | 38.18 | 40.01 |
| 13.5        | -1.543                             | 0.09  | 26.9  | 27.75 | 28.22 | 29.55 | 30.42 | 32.23    | 34.34 | 35.62 | 38.09                            | 39.17 | 41.43 | -0.217 | 0.096 | 25.71 | 26.79 | 27.39 | 28.99 | 30.01 | 32.01    | 34.17 | 35.41 | 37.61 | 38.51 | 40.28 |
| 14          | -1.498                             | 0.086 | 27.48 | 28.32 | 28.79 | 30.1  | 30.96 | 32.72    | 34.77 | 36    | 38.35                            | 39.36 | 41.48 | -0.166 | 0.094 | 26.19 | 27.27 | 27.86 | 29.46 | 30.46 | 32.44    | 34.57 | 35.78 | 37.93 | 38.8  | 40.51 |
| 14.5        | -1.455                             | 0.083 | 27.98 | 28.81 | 29.28 | 30.57 | 31.41 | 33.14    | 35.13 | 36.32 | 38.56                            | 39.53 | 41.53 | -0.116 | 0.091 | 26.63 | 27.71 | 28.31 | 29.9  | 30.89 | 32.84    | 34.93 | 36.12 | 38.21 | 39.05 | 40.71 |
| 15          | -1.413                             | 0.08  | 28.38 | 29.21 | 29.68 | 30.96 | 31.79 | 33.49    | 35.43 | 36.58 | 38.75                            | 39.68 | 41.58 | -0.068 | 0.089 | 27.05 | 28.13 | 28.72 | 30.3  | 31.28 | 33.21    | 35.26 | 36.42 | 38.45 | 39.28 | 40.88 |
| 15.5        | -1.373                             | 0.078 | 28.69 | 29.52 | 29.98 | 31.26 | 32.08 | 33.76    | 35.67 | 36.8  | 38.91                            | 39.81 | 41.65 | -0.021 | 0.086 | 27.44 | 28.51 | 29.1  | 30.66 | 31.64 | 33.54    | 35.55 | 36.69 | 38.67 | 39.47 | 41.03 |
| 16          | -1.334                             | 0.077 | 28.91 | 29.74 | 30.2  | 31.47 | 32.29 | 33.96    | 35.85 | 36.97 | 39.04                            | 39.92 | 41.72 | 0.024  | 0.084 | 27.79 | 28.86 | 29.44 | 31    | 31.96 | 33.84    | 35.82 | 36.93 | 38.87 | 39.65 | 41.16 |
| 16.5        | -1.296                             | 0.077 | 29.03 | 29.86 | 30.32 | 31.6  | 32.42 | 34.09    | 35.96 | 37.07 | 39.13                            | 40    | 41.77 | 0.067  | 0.083 | 28.11 | 29.18 | 29.76 | 31.3  | 32.26 | 34.11    | 36.06 | 37.15 | 39.05 | 39.81 | 41.29 |
| 17          | -1.259                             | 0.077 | 29.05 | 29.89 | 30.35 | 31.64 | 32.46 | 34.13    | 36    | 37.11 | 39.15                            | 40.02 | 41.77 | 0.11   | 0.081 | 28.4  | 29.46 | 30.04 | 31.58 | 32.53 | 34.36    | 36.29 | 37.36 | 39.23 | 39.97 | 41.42 |
| 17.5        | -1.223                             | 0.077 | 29    | 29.84 | 30.31 | 31.6  | 32.43 | 34.1     | 35.98 | 37.09 | 39.13                            | 39.99 | 41.74 | 0.151  | 0.08  | 28.66 | 29.73 | 30.31 | 31.84 | 32.78 | 34.6     | 36.5  | 37.56 | 39.4  | 40.13 | 41.55 |
| 18          | -1.189                             | 0.078 | 28.89 | 29.74 | 30.21 | 31.51 | 32.34 | 34.02    | 35.91 | 37.02 | 39.06                            | 39.93 | 41.67 | 0.191  | 0.079 | 28.91 | 29.97 | 30.55 | 32.08 | 33.02 | 34.83    | 36.71 | 37.76 | 39.57 | 40.29 | 41.69 |

Supplementary Table 12. Smoothed percentiles for FM% by anthropometry, for female and male 5 to 18 years.

| Age  | Total body fat mass percentage by anthropometry (Slaughter equation) |       |       |       |       |       |       |          |       |       |                                  |       |       |        |       |      |      |      |       |       |          |       |       |       |       |       |
|------|----------------------------------------------------------------------|-------|-------|-------|-------|-------|-------|----------|-------|-------|----------------------------------|-------|-------|--------|-------|------|------|------|-------|-------|----------|-------|-------|-------|-------|-------|
|      | Female LMS parameters and centiles                                   |       |       |       |       |       |       |          |       |       | Male LMS parameters and centiles |       |       |        |       |      |      |      |       |       |          |       |       |       |       |       |
|      | L                                                                    | S     | 1th   | 3th   | 5th   | 15th  | 25th  | 50th (M) | 75th  | 85th  | 95th                             | 97th  | 99th  | L      | S     | 1th  | 3th  | 5th  | 15th  | 25th  | 50th (M) | 75th  | 85th  | 95th  | 97th  | 99th  |
| 5    | -1.355                                                               | 0.137 | 12.3  | 12.67 | 12.89 | 13.61 | 14.17 | 15.63    | 17.5  | 18.54 | 20.3                             | 20.99 | 22.33 | -0.664 | 0.214 | 7.84 | 8.42 | 8.76 | 9.75  | 10.44 | 12.01    | 14    | 15.29 | 17.91 | 19.11 | 21.77 |
| 5.5  | -1.212                                                               | 0.153 | 12.34 | 12.76 | 13.02 | 13.84 | 14.49 | 16.16    | 18.33 | 19.55 | 21.67                            | 22.52 | 24.19 | -0.638 | 0.233 | 7.8  | 8.38 | 8.73 | 9.77  | 10.52 | 12.28    | 14.57 | 16.04 | 19.01 | 20.37 | 23.36 |
| 6    | -1.08                                                                | 0.17  | 12.16 | 12.63 | 12.93 | 13.85 | 14.57 | 16.43    | 18.87 | 20.28 | 22.67                            | 23.75 | 25.76 | -0.614 | 0.252 | 7.79 | 8.39 | 8.75 | 9.86  | 10.67 | 12.64    | 15.27 | 16.95 | 20.33 | 21.88 | 25.26 |
| 6.5  | -0.961                                                               | 0.186 | 11.88 | 12.41 | 12.74 | 13.75 | 14.55 | 16.59    | 19.29 | 20.87 | 23.68                            | 24.85 | 27.2  | -0.593 | 0.272 | 7.82 | 8.45 | 8.82 | 10    | 10.88 | 13.09    | 16.1  | 18.03 | 21.9  | 23.67 | 27.54 |
| 7    | -0.855                                                               | 0.202 | 11.62 | 12.19 | 12.55 | 13.66 | 14.52 | 16.75    | 19.69 | 21.43 | 24.58                            | 25.91 | 28.59 | -0.573 | 0.292 | 7.89 | 8.54 | 8.93 | 10.18 | 11.14 | 13.6     | 17.04 | 19.25 | 23.68 | 25.7  | 30.12 |
| 7.5  | -0.76                                                                | 0.216 | 11.43 | 12.06 | 12.44 | 13.65 | 14.58 | 16.97    | 20.15 | 22.04 | 25.51                            | 26.97 | 29.97 | -0.554 | 0.31  | 7.97 | 8.64 | 9.06 | 10.38 | 11.41 | 14.13    | 18.01 | 20.52 | 25.54 | 27.84 | 32.86 |
| 8    | -0.675                                                               | 0.227 | 11.33 | 12.02 | 12.43 | 13.73 | 14.74 | 17.28    | 20.66 | 22.68 | 26.41                            | 28    | 31.25 | -0.536 | 0.327 | 8.06 | 8.75 | 9.18 | 10.58 | 11.69 | 14.66    | 18.98 | 21.78 | 27.41 | 29.98 | 35.61 |
| 8.5  | -0.594                                                               | 0.236 | 11.31 | 12.05 | 12.49 | 13.89 | 14.96 | 17.64    | 21.19 | 23.31 | 27.24                            | 28.9  | 32.33 | -0.52  | 0.342 | 8.14 | 8.86 | 9.31 | 10.77 | 11.95 | 15.17    | 19.91 | 23    | 29.21 | 32.04 | 38.25 |
| 9    | -0.516                                                               | 0.241 | 11.38 | 12.18 | 12.66 | 14.15 | 15.28 | 18.09    | 21.77 | 23.97 | 28.03                            | 29.75 | 33.28 | -0.504 | 0.355 | 8.22 | 8.96 | 9.42 | 10.95 | 12.19 | 15.63    | 20.75 | 24.1  | 30.85 | 33.93 | 40.68 |
| 9.5  | -0.44                                                                | 0.244 | 11.57 | 12.42 | 12.94 | 14.53 | 15.72 | 18.65    | 22.45 | 24.71 | 28.86                            | 30.62 | 34.19 | -0.489 | 0.366 | 8.27 | 9.03 | 9.51 | 11.1  | 12.39 | 16.01    | 21.47 | 25.05 | 32.27 | 35.57 | 42.8  |
| 10   | -0.365                                                               | 0.245 | 11.83 | 12.75 | 13.3  | 14.99 | 16.25 | 19.3     | 23.19 | 25.49 | 29.7                             | 31.47 | 35.05 | -0.475 | 0.375 | 8.3  | 9.08 | 9.57 | 11.2  | 12.55 | 16.32    | 22.05 | 25.82 | 33.42 | 36.9  | 44.52 |
| 10.5 | -0.291                                                               | 0.244 | 12.12 | 13.11 | 13.7  | 15.49 | 16.81 | 19.96    | 23.92 | 26.25 | 30.48                            | 32.24 | 35.79 | -0.462 | 0.382 | 8.3  | 9.1  | 9.6  | 11.27 | 12.65 | 16.54    | 22.47 | 26.38 | 34.28 | 37.9  | 45.83 |
| 11   | -0.217                                                               | 0.243 | 12.41 | 13.47 | 14.1  | 15.99 | 17.37 | 20.62    | 24.63 | 26.97 | 31.2                             | 32.95 | 36.45 | -0.449 | 0.387 | 8.27 | 9.08 | 9.59 | 11.29 | 12.7  | 16.67    | 22.73 | 26.74 | 34.85 | 38.57 | 46.72 |
| 11.5 | -0.147                                                               | 0.241 | 12.71 | 13.83 | 14.5  | 16.49 | 17.93 | 21.26    | 25.32 | 27.67 | 31.89                            | 33.63 | 37.09 | -0.437 | 0.392 | 8.21 | 9.03 | 9.55 | 11.27 | 12.69 | 16.71    | 22.85 | 26.92 | 35.15 | 38.93 | 47.22 |
| 12   | -0.082                                                               | 0.24  | 13.01 | 14.2  | 14.91 | 17.01 | 18.5  | 21.92    | 26.03 | 28.39 | 32.62                            | 34.36 | 37.8  | -0.426 | 0.395 | 8.12 | 8.95 | 9.47 | 11.21 | 12.64 | 16.68    | 22.85 | 26.94 | 35.23 | 39.03 | 47.38 |
| 12.5 | -0.026                                                               | 0.238 | 13.32 | 14.59 | 15.33 | 17.53 | 19.08 | 22.59    | 26.76 | 29.15 | 33.41                            | 35.15 | 38.59 | -0.415 | 0.397 | 8.02 | 8.85 | 9.38 | 11.12 | 12.56 | 16.6     | 22.75 | 26.83 | 35.12 | 38.93 | 47.28 |
| 13   | 0.021                                                                | 0.237 | 13.64 | 14.98 | 15.76 | 18.07 | 19.68 |          |       |       |                                  |       |       |        |       |      |      |      |       |       |          |       |       |       |       |       |

Supplementary Table 13. Smoothed percentiles for SMM by anthropometry, for female and male 5 to 18 years.

| Skeletal muscle mass (kg) by anthropometry (POORTMANS equation) |                                    |       |       |       |       |       |       |          |       |       |       |       |                                  |        |       |       |       |       |       |       |          |       |       |       |       |       |
|-----------------------------------------------------------------|------------------------------------|-------|-------|-------|-------|-------|-------|----------|-------|-------|-------|-------|----------------------------------|--------|-------|-------|-------|-------|-------|-------|----------|-------|-------|-------|-------|-------|
| Age                                                             | Female LMS parameters and centiles |       |       |       |       |       |       |          |       |       |       |       | Male LMS parameters and centiles |        |       |       |       |       |       |       |          |       |       |       |       |       |
|                                                                 | L                                  | S     | 1th   | 3th   | 5th   | 15th  | 25th  | 50th (M) | 75th  | 85th  | 95th  | 97th  | 99th                             | L      | S     | 1th   | 3th   | 5th   | 15th  | 25th  | 50th (M) | 75th  | 85th  | 95th  | 97th  | 99th  |
| 5                                                               | -0.8                               | 0.148 | 4.78  | 5.04  | 5.18  | 5.6   | 5.88  | 6.47     | 7.18  | 7.62  | 8.48  | 8.87  | 9.68                             | -1.441 | 0.127 | 6.97  | 7.27  | 7.43  | 7.91  | 8.23  | 8.92     | 9.78  | 10.33 | 11.44 | 11.96 | 13.12 |
| 5.5                                                             | -0.752                             | 0.158 | 5.14  | 5.44  | 5.61  | 6.1   | 6.42  | 7.12     | 7.96  | 8.48  | 9.51  | 9.97  | 10.96                            | -1.326 | 0.128 | 7.4   | 7.72  | 7.9   | 8.42  | 8.77  | 9.51     | 10.42 | 11    | 12.16 | 12.69 | 13.86 |
| 6                                                               | -0.709                             | 0.168 | 5.44  | 5.78  | 5.97  | 6.52  | 6.9   | 7.69     | 8.66  | 9.27  | 10.47 | 11.01 | 12.17                            | -1.222 | 0.134 | 7.77  | 8.12  | 8.32  | 8.89  | 9.28  | 10.11    | 11.12 | 11.77 | 13.06 | 13.65 | 14.95 |
| 6.5                                                             | -0.669                             | 0.179 | 5.7   | 6.08  | 6.29  | 6.91  | 7.33  | 8.23     | 9.33  | 10.03 | 11.41 | 12.04 | 13.39                            | -1.126 | 0.143 | 8.09  | 8.49  | 8.71  | 9.36  | 9.79  | 10.73    | 11.88 | 12.62 | 14.1  | 14.78 | 16.28 |
| 7                                                               | -0.632                             | 0.189 | 5.96  | 6.37  | 6.61  | 7.3   | 7.76  | 8.78     | 10.02 | 10.81 | 12.4  | 13.11 | 14.67                            | -1.037 | 0.153 | 8.41  | 8.85  | 9.11  | 9.83  | 10.32 | 11.38    | 12.69 | 13.52 | 15.22 | 16    | 17.71 |
| 7.5                                                             | -0.598                             | 0.197 | 6.25  | 6.71  | 6.97  | 7.73  | 8.25  | 9.38     | 10.78 | 11.67 | 13.46 | 14.28 | 16.05                            | -0.955 | 0.162 | 8.73  | 9.22  | 9.5   | 10.31 | 10.86 | 12.05    | 13.53 | 14.47 | 16.39 | 17.28 | 19.23 |
| 8                                                               | -0.565                             | 0.205 | 6.58  | 7.09  | 7.38  | 8.21  | 8.79  | 10.04    | 11.59 | 12.58 | 14.58 | 15.49 | 17.47                            | -0.877 | 0.171 | 9.07  | 9.61  | 9.92  | 10.82 | 11.43 | 12.75    | 14.4  | 15.45 | 17.6  | 18.59 | 20.78 |
| 8.5                                                             | -0.535                             | 0.21  | 6.94  | 7.49  | 7.8   | 8.72  | 9.35  | 10.72    | 12.42 | 13.51 | 15.71 | 16.71 | 18.89                            | -0.805 | 0.179 | 9.42  | 10.02 | 10.36 | 11.35 | 12.02 | 13.49    | 15.31 | 16.48 | 18.86 | 19.96 | 22.37 |
| 9                                                               | -0.507                             | 0.215 | 7.34  | 7.93  | 8.28  | 9.28  | 9.96  | 11.45    | 13.31 | 14.51 | 16.9  | 18    | 20.38                            | -0.736 | 0.186 | 9.79  | 10.44 | 10.81 | 11.9  | 12.64 | 14.26    | 16.27 | 17.56 | 20.19 | 21.39 | 24.04 |
| 9.5                                                             | -0.48                              | 0.218 | 7.8   | 8.45  | 8.82  | 9.91  | 10.66 | 12.29    | 14.31 | 15.61 | 18.22 | 19.4  | 21.98                            | -0.671 | 0.193 | 10.17 | 10.88 | 11.29 | 12.48 | 13.3  | 15.07    | 17.27 | 18.69 | 21.55 | 22.87 | 25.75 |
| 10                                                              | -0.454                             | 0.221 | 8.33  | 9.03  | 9.44  | 10.63 | 11.44 | 13.21    | 15.41 | 16.82 | 19.64 | 20.92 | 23.7                             | -0.61  | 0.199 | 10.58 | 11.36 | 11.8  | 13.1  | 13.99 | 15.92    | 18.32 | 19.85 | 22.95 | 24.37 | 27.46 |
| 10.5                                                            | -0.43                              | 0.222 | 8.92  | 9.68  | 10.13 | 11.42 | 12.3  | 14.22    | 16.59 | 18.11 | 21.14 | 22.51 | 25.48                            | -0.551 | 0.204 | 11.03 | 11.87 | 12.36 | 13.77 | 14.73 | 16.81    | 19.4  | 21.05 | 24.36 | 25.87 | 29.14 |
| 11                                                              | -0.407                             | 0.222 | 9.58  | 10.41 | 10.89 | 12.29 | 13.24 | 15.3     | 17.86 | 19.48 | 22.71 | 24.17 | 27.3                             | -0.496 | 0.207 | 11.53 | 12.44 | 12.96 | 14.48 | 15.51 | 17.75    | 20.5  | 22.26 | 25.75 | 27.33 | 30.74 |
| 11.5                                                            | -0.384                             | 0.22  | 10.32 | 11.21 | 11.73 | 13.23 | 14.25 | 16.47    | 19.19 | 20.91 | 24.32 | 25.85 | 29.13                            | -0.442 | 0.208 | 12.08 | 13.05 | 13.61 | 15.23 | 16.33 | 18.71    | 21.62 | 23.45 | 27.09 | 28.72 | 32.2  |
| 12                                                              | -0.363                             | 0.218 | 11.11 | 12.07 | 12.62 | 14.23 | 15.32 | 17.67    | 20.55 | 22.36 | 25.93 | 27.52 | 30.91                            | -0.391 | 0.206 | 12.69 | 13.73 | 14.32 | 16.04 | 17.2  | 19.69    | 22.72 | 24.61 | 28.33 | 29.98 | 33.49 |
| 12.5                                                            | -0.343                             | 0.214 | 11.91 | 12.94 | 13.53 | 15.23 | 16.38 | 18.86    | 21.87 | 23.75 | 27.44 | 29.08 | 32.55                            | -0.342 | 0.202 | 13.38 | 14.47 | 15.1  | 16.9  | 18.11 | 20.7     | 23.8  | 25.72 | 29.46 | 31.11 | 34.57 |
| 13                                                              | -0.323                             | 0.21  | 12.7  | 13.78 | 14.41 | 16.2  | 17.4  | 19.98    | 23.1  | 25.04 | 28.81 | 30.48 | 33.99                            | -0.295 | 0.196 | 14.14 | 15.29 | 15.94 | 17.81 | 19.06 | 21.71    | 24.85 | 26.78 | 30.48 | 32.09 | 35.46 |
| 13.5                                                            | -0.304                             | 0.205 | 13.45 | 14.59 | 15.24 | 17.1  | 18.35 | 21.01    | 24.21 | 26.19 | 30.01 | 31.69 | 35.21                            | -0.25  | 0.189 | 14.96 | 16.15 | 16.83 | 18.76 | 20.03 | 22.72    | 25.86 | 27.78 | 31.41 | 32.98 | 36.22 |
| 14                                                              | -0.286                             | 0.201 | 14.16 | 15.34 | 16.01 | 17.93 | 19.22 | 21.96    | 25.21 | 27.21 | 31.07 | 32.75 | 36.26                            | -0.207 | 0.182 | 15.8  | 17.03 | 17.73 | 19.7  | 21    | 23.71    | 26.84 | 28.73 | 32.29 | 33.81 | 36.92 |
| 14.5                                                            | -0.269                             | 0.197 | 14.81 | 16.03 | 16.72 | 18.7  | 20.02 | 22.81    | 26.1  | 28.12 | 31.99 | 33.67 | 37.15                            | -0.165 | 0.175 | 16.62 | 17.89 | 18.61 | 20.62 | 21.94 | 24.66    | 27.78 | 29.65 | 33.12 | 34.6  | 37.59 |
| 15                                                              | -0.252                             | 0.193 | 15.41 | 16.66 | 17.37 | 19.4  | 20.74 | 23.57    | 26.89 | 28.92 | 32.78 | 34.45 | 37.91                            | -0.124 | 0.169 | 17.39 | 18.7  | 19.43 | 21.48 | 22.82 | 25.56    | 28.68 | 30.53 | 33.94 | 35.38 | 38.29 |
| 15.5                                                            | -0.235                             | 0.189 | 15.95 | 17.22 | 17.95 | 20    | 21.36 | 24.22    | 27.56 | 29.59 | 33.44 | 35.1  | 38.51                            | -0.085 | 0.165 | 18.09 | 19.43 | 20.18 | 22.27 | 23.63 | 26.4     | 29.53 | 31.37 | 34.76 | 36.18 | 39.03 |
| 16                                                              | -0.22                              | 0.185 | 16.4  | 17.69 | 18.43 | 20.51 | 21.88 | 24.75    | 28.1  | 30.12 | 33.94 | 35.58 | 38.94                            | -0.047 | 0.163 | 18.68 | 20.06 | 20.84 | 22.98 | 24.37 | 27.19    | 30.35 | 32.2  | 35.59 | 37    | 39.83 |
| 16.5                                                            | -0.204                             | 0.182 | 16.76 | 18.07 | 18.81 | 20.9  | 22.28 | 25.16    | 28.49 | 30.49 | 34.26 | 35.88 | 39.18                            | -0.01  | 0.162 | 19.18 | 20.6  | 21.4  | 23.61 | 25.04 | 27.92    | 31.15 | 33.03 | 36.45 | 37.87 | 40.72 |
| 17                                                              | -0.189                             | 0.179 | 17.03 | 18.34 | 19.09 | 21.18 | 22.56 | 25.42    | 28.72 | 30.7  | 34.41 | 35.99 | 39.22                            | 0.026  | 0.163 | 19.57 | 21.05 | 21.88 | 24.17 | 25.64 | 28.62    | 31.93 | 33.86 | 37.36 | 38.81 | 41.7  |
| 17.5                                                            | -0.175                             | 0.176 | 17.21 | 18.52 | 19.27 | 21.35 | 22.72 | 25.55    | 28.81 | 30.75 | 34.38 | 35.93 | 39.07                            | 0.061  | 0.165 | 19.86 | 21.41 | 22.27 | 24.66 | 26.19 | 29.28    | 32.72 | 34.71 | 38.33 | 39.82 | 42.79 |
| 18                                                              | -0.161                             | 0.173 | 17.31 | 18.62 | 19.36 | 21.42 | 22.77 | 25.56    | 28.76 | 30.67 | 34.21 | 35.71 | 38.76                            | 0.095  | 0.168 | 20.07 | 21.69 | 22.6  | 25.09 | 26.69 | 29.92    | 33.5  | 35.58 | 39.34 | 40.89 | 43.97 |

Supplementary Table 14. Smoothed percentiles for FFM by anthropometry, for female and male 5 to 18 years.

| Total body fat free mass by anthropometry (by Slaughter equation) |                                    |       |       |       |       |       |       |          |       |       |       |       |                                  |        |       |       |       |       |       |       |          |       |       |       |       |       |
|-------------------------------------------------------------------|------------------------------------|-------|-------|-------|-------|-------|-------|----------|-------|-------|-------|-------|----------------------------------|--------|-------|-------|-------|-------|-------|-------|----------|-------|-------|-------|-------|-------|
| Age                                                               | Female LMS parameters and centiles |       |       |       |       |       |       |          |       |       |       |       | Male LMS parameters and centiles |        |       |       |       |       |       |       |          |       |       |       |       |       |
|                                                                   | L                                  | S     | 1th   | 3th   | 5th   | 15th  | 25th  | 50th (M) | 75th  | 85th  | 95th  | 97th  | 99th                             | L      | S     | 1th   | 3th   | 5th   | 15th  | 25th  | 50th (M) | 75th  | 85th  | 95th  | 97th  | 99th  |
| 5                                                                 | -0.324                             | 0.110 | 11.31 | 11.84 | 12.14 | 12.94 | 13.45 | 14.47    | 15.60 | 16.25 | 17.44 | 17.93 | 18.90                            | 0.629  | 0.119 | 11.57 | 12.32 | 12.73 | 13.80 | 14.45 | 15.70    | 16.98 | 17.68 | 18.89 | 19.36 | 20.27 |
| 5.5                                                               | -0.347                             | 0.109 | 12.30 | 12.87 | 13.18 | 14.05 | 14.59 | 15.70    | 16.92 | 17.62 | 18.90 | 19.43 | 20.49                            | 0.978  | 0.122 | 11.87 | 12.77 | 13.25 | 14.48 | 15.21 | 16.58    | 17.95 | 18.68 | 19.92 | 20.40 | 21.31 |
| 6                                                                 | -0.368                             | 0.109 | 13.16 | 13.76 | 14.10 | 15.01 | 15.59 | 16.76    | 18.05 | 18.80 | 20.15 | 20.72 | 21.84                            | 0.931  | 0.126 | 12.88 | 13.44 | 13.95 | 15.27 | 16.06 | 17.55    | 19.04 | 19.84 | 21.19 | 21.72 | 22.72 |
| 6.5                                                               | -0.388                             | 0.115 | 13.72 | 14.38 | 14.74 | 15.75 | 16.39 | 17.69    | 19.14 | 19.98 | 21.52 | 22.17 | 23.45                            | 0.523  | 0.129 | 13.39 | 14.31 | 14.82 | 16.15 | 16.97 | 18.54    | 20.19 | 21.10 | 22.67 | 23.29 | 24.49 |
| 7                                                                 | -0.405                             | 0.129 | 14.02 | 14.77 | 15.18 | 16.34 | 17.08 | 18.61    | 20.33 | 21.35 | 23.23 | 24.02 | 25.62                            | -0.035 | 0.132 | 14.42 | 15.28 | 15.76 | 17.07 | 17.90 | 19.56    | 21.38 | 22.43 | 24.32 | 25.09 | 26.63 |
| 7.5                                                               | -0.422                             | 0.143 | 14.34 | 15.17 | 15.64 | 16.95 | 17.80 | 19.57    | 21.59 | 22.80 | 25.07 | 26.03 | 28.00                            | -0.550 | 0.135 | 15.40 | 16.22 | 16.69 | 17.98 | 18.83 | 20.57    | 22.59 | 23.80 | 26.07 | 27.04 | 29.04 |
| 8                                                                 | -0.438                             | 0.148 | 14.92 | 15.81 | 16.32 | 17.73 | 18.65 | 20.57    | 22.79 | 24.12 | 26.63 | 27.70 | 29.91                            | -0.949 | 0.138 | 16.34 | 17.15 | 17.61 | 18.91 | 19.78 | 21.62    | 23.83 | 25.21 | 27.91 | 29.12 | 31.70 |
| 8.5                                                               | -0.452                             | 0.145 | 15.80 | 16.73 | 17.25 | 18.70 | 19.65 | 21.63    | 23.90 | 25.27 | 27.83 | 28.93 | 31.18                            | -1.178 | 0.141 | 17.22 | 18.04 | 18.51 | 19.85 | 20.76 | 22.71    | 25.12 | 26.66 | 29.76 | 31.19 | 34.35 |
| 9                                                                 | -0.466                             | 0.141 | 16.81 | 17.76 | 18.30 | 19.79 | 20.77 | 22.79    | 25.11 | 26.50 | 29.11 | 30.22 | 32.50                            | -1.210 | 0.143 | 18.03 | 18.90 | 19.39 | 20.82 | 21.78 | 23.87    | 26.45 | 28.12 | 31.51 | 33.08 | 36.59 |
| 9.5                                                               | -0.479                             | 0.141 | 17.77 | 18.78 | 19.34 | 20.93 | 21.96 | 24.11    | 26.57 | 28.05 | 30.83 | 32.02 | 34.46                            | -1.063 | 0.146 | 18.80 | 19.74 | 20.28 | 21.83 | 22.87 | 25.11    | 27.86 | 29.61 | 33.12 | 34.73 | 38.24 |
| 10                                                                | -0.492                             | 0.148 | 18.62 | 19.72 | 20.34 | 22.07 | 23.21 | 25.58    | 28.33 | 30.00 | 33.14 | 34.49 | 37.27                            | -0.797 | 0.148 | 19.55 | 20.61 | 21.22 | 22.93 | 24.07 | 26.49    | 29.39 | 31.19 | 34.70 | 36.26 | 39.58 |
| 10.5                                                              | -0.503                             | 0.158 | 19.41 | 20.61 | 21.30 | 23.23 | 24.51 | 27.19    | 30.34 | 32.26 | 35.93 | 37.52 | 40.84                            | -0.453 | 0.149 | 20.30 | 21.51 | 22.20 | 24.13 | 25.39 | 28.02    | 31.06 | 32.89 | 36.34 | 37.83 | 40.87 |
| 11                                                                | -0.515                             | 0.168 | 20.27 | 21.59 | 22.34 | 24.48 | 25.91 | 28.92    | 32.49 | 34.69 | 38.93 | 40.79 | 44.69                            | -0.074 | 0.150 | 21.03 | 22.45 | 23.24 | 25.44 | 26.84 | 29.70    | 32.88 | 34.73 | 38.11 | 39.51 | 42.32 |
| 11.5                                                              | -0.525                             | 0.172 | 21.33 | 22.75 | 23.57 | 25.88 | 27.42 | 30.69    | 34.60 | 37.02 | 41.72 | 43.79 | 48.15                            | 0.282  | 0.151 | 21.78 | 23.45 | 24.37 | 26.87 | 28.43 | 31.53    | 34.85 | 36.74 | 40.07 | 41.42 | 44.06 |
| 12                                                                | -0.536                             | 0.170 | 22.65 | 24.14 | 24.99 | 27.40 | 29.01 | 32.43    | 36.50 | 39.02 | 43.90 | 46.05 | 50.58                            | 0.571  | 0.151 | 22.63 | 24.57 | 25.62 | 28.43 | 30.16 | 33.49    | 36.98 | 38.91 | 42.25 | 43.58 | 46.13 |
| 12.5                                                              | -0.545                             | 0.162 | 24.15 | 25.66 | 26.53 | 28.97 | 30.60 | 34.03    | 38.09 | 40.58 | 45.39 | 47.50 | 51.91                            | 0.766  | 0.151 | 23.65 | 25.85 | 27.03 | 30.12 | 32.00 | 35.57    | 39.23 | 41.23 | 44.64 | 45.98 | 48.53 |
| 13                                                                | -0.                                |       |       |       |       |       |       |          |       |       |       |       |                                  |        |       |       |       |       |       |       |          |       |       |       |       |       |

Supplementary Table 15. Smoothed percentiles for FM by anthropometry, for female and male 5 to 18 years.

| Age  | Female LMS parameters and centiles |       |      |      |      |      |      |          |       |       |       |       |       | Male LMS parameters and centiles |       |      |      |      |       |       |          |       |       |       |       |       |
|------|------------------------------------|-------|------|------|------|------|------|----------|-------|-------|-------|-------|-------|----------------------------------|-------|------|------|------|-------|-------|----------|-------|-------|-------|-------|-------|
|      | L                                  | S     | 1th  | 3th  | 5th  | 15th | 25th | 50th (M) | 75th  | 85th  | 95th  | 97th  | 99th  | L                                | S     | 1th  | 3th  | 5th  | 15th  | 25th  | 50th (M) | 75th  | 85th  | 95th  | 97th  | 99th  |
| 5    | -0.479                             | 0.291 | 1.1  | 1.3  | 1.42 | 1.73 | 1.93 | 2.34     | 2.79  | 3.07  | 3.58  | 3.79  | 4.24  | 0.345                            | 0.271 | 1.39 | 1.53 | 1.62 | 1.88  | 2.06  | 2.49     | 3.06  | 3.45  | 4.29  | 4.7   | 5.65  |
| 5.5  | -0.45                              | 0.312 | 1.2  | 1.4  | 1.52 | 1.85 | 2.08 | 2.57     | 3.14  | 3.5   | 4.16  | 4.44  | 5.03  | 0.177                            | 0.306 | 1.5  | 1.67 | 1.78 | 2.08  | 2.31  | 2.82     | 3.51  | 4     | 5.05  | 5.57  | 6.78  |
| 6    | -0.423                             | 0.332 | 1.26 | 1.47 | 1.59 | 1.97 | 2.23 | 2.81     | 3.54  | 4     | 4.91  | 5.32  | 6.17  | 0.032                            | 0.342 | 1.59 | 1.78 | 1.89 | 2.24  | 2.5   | 3.09     | 3.91  | 4.49  | 5.75  | 6.38  | 7.87  |
| 6.5  | -0.399                             | 0.351 | 1.32 | 1.54 | 1.68 | 2.09 | 2.39 | 3.08     | 3.99  | 4.59  | 5.85  | 6.43  | 7.71  | -0.089                           | 0.379 | 1.64 | 1.85 | 1.98 | 2.37  | 2.66  | 3.33     | 4.27  | 4.93  | 6.42  | 7.17  | 8.95  |
| 7    | -0.376                             | 0.369 | 1.38 | 1.62 | 1.77 | 2.22 | 2.56 | 3.37     | 4.49  | 5.27  | 6.99  | 7.83  | 9.76  | -0.184                           | 0.416 | 1.69 | 1.92 | 2.06 | 2.5   | 2.81  | 3.57     | 4.63  | 5.39  | 7.11  | 7.98  | 10.07 |
| 7.5  | -0.355                             | 0.385 | 1.46 | 1.72 | 1.87 | 2.37 | 2.75 | 3.68     | 5.05  | 6.04  | 8.34  | 9.52  | 12.39 | -0.255                           | 0.449 | 1.77 | 2.02 | 2.17 | 2.65  | 3     | 3.84     | 5.05  | 5.91  | 7.88  | 8.88  | 11.3  |
| 8    | -0.336                             | 0.398 | 1.55 | 1.82 | 2    | 2.54 | 2.97 | 4.03     | 5.65  | 6.88  | 9.86  | 11.47 | 15.55 | -0.302                           | 0.477 | 1.86 | 2.14 | 2.3  | 2.83  | 3.22  | 4.16     | 5.51  | 6.49  | 8.71  | 9.85  | 12.6  |
| 8.5  | -0.317                             | 0.408 | 1.65 | 1.95 | 2.13 | 2.74 | 3.21 | 4.41     | 6.3   | 7.77  | 11.49 | 13.56 | 19.07 | -0.331                           | 0.499 | 1.97 | 2.27 | 2.45 | 3.03  | 3.46  | 4.51     | 6.01  | 7.09  | 9.58  | 10.85 | 13.92 |
| 9    | -0.3                               | 0.415 | 1.77 | 2.09 | 2.29 | 2.95 | 3.47 | 4.81     | 6.97  | 8.69  | 13.13 | 15.68 | 22.66 | -0.348                           | 0.515 | 2.1  | 2.43 | 2.64 | 3.27  | 3.75  | 4.9      | 6.57  | 7.77  | 10.52 | 11.93 | 15.33 |
| 9.5  | -0.283                             | 0.42  | 1.89 | 2.24 | 2.46 | 3.18 | 3.75 | 5.23     | 7.64  | 9.58  | 14.69 | 17.67 | 25.97 | -0.354                           | 0.526 | 2.27 | 2.64 | 2.87 | 3.57  | 4.1   | 5.38     | 7.23  | 8.57  | 11.61 | 13.17 | 16.9  |
| 10   | -0.268                             | 0.423 | 2.03 | 2.4  | 2.64 | 3.42 | 4.04 | 5.66     | 8.3   | 10.44 | 16.1  | 19.42 | 28.73 | -0.353                           | 0.532 | 2.48 | 2.89 | 3.14 | 3.93  | 4.52  | 5.95     | 8.01  | 9.49  | 12.85 | 14.56 | 18.65 |
| 10.5 | -0.253                             | 0.425 | 2.17 | 2.57 | 2.83 | 3.67 | 4.34 | 6.09     | 8.94  | 11.25 | 17.33 | 20.88 | 30.82 | -0.346                           | 0.534 | 2.72 | 3.18 | 3.46 | 4.33  | 4.99  | 6.58     | 8.86  | 10.49 | 14.19 | 16.06 | 20.51 |
| 11   | -0.239                             | 0.425 | 2.31 | 2.74 | 3.02 | 3.92 | 4.63 | 6.5      | 9.54  | 11.98 | 18.36 | 22.06 | 32.29 | -0.337                           | 0.532 | 2.99 | 3.5  | 3.81 | 4.78  | 5.51  | 7.27     | 9.78  | 11.57 | 15.61 | 17.64 | 22.45 |
| 11.5 | -0.225                             | 0.424 | 2.45 | 2.91 | 3.21 | 4.17 | 4.92 | 6.9      | 10.09 | 12.63 | 19.21 | 22.98 | 33.27 | -0.325                           | 0.529 | 3.29 | 3.85 | 4.19 | 5.27  | 6.07  | 8.01     | 10.77 | 12.73 | 17.12 | 19.31 | 24.46 |
| 12   | -0.212                             | 0.423 | 2.59 | 3.08 | 3.39 | 4.4  | 5.2  | 7.27     | 10.59 | 13.21 | 19.91 | 23.71 | 33.91 | -0.314                           | 0.525 | 3.61 | 4.23 | 4.61 | 5.8   | 6.68  | 8.81     | 11.83 | 13.96 | 18.7  | 21.05 | 26.56 |
| 12.5 | -0.2                               | 0.421 | 2.72 | 3.24 | 3.56 | 4.63 | 5.46 | 7.62     | 11.04 | 13.72 | 20.5  | 24.29 | 34.36 | -0.304                           | 0.52  | 3.95 | 4.63 | 5.05 | 6.36  | 7.33  | 9.66     | 12.93 | 15.24 | 20.33 | 22.85 | 28.69 |
| 13   | -0.188                             | 0.418 | 2.85 | 3.39 | 3.73 | 4.84 | 5.71 | 7.94     | 11.44 | 14.17 | 20.99 | 24.78 | 34.7  | -0.296                           | 0.514 | 4.3  | 5.05 | 5.51 | 6.93  | 7.99  | 10.51    | 14.05 | 16.53 | 21.97 | 24.63 | 30.79 |
| 13.5 | -0.176                             | 0.416 | 2.98 | 3.54 | 3.9  | 5.04 | 5.94 | 8.23     | 11.81 | 14.57 | 21.44 | 25.21 | 35.03 | -0.291                           | 0.508 | 4.65 | 5.46 | 5.96 | 7.5   | 8.64  | 11.36    | 15.15 | 17.79 | 23.55 | 26.36 | 32.81 |
| 14   | -0.165                             | 0.413 | 3.1  | 3.68 | 4.05 | 5.23 | 6.15 | 8.5      | 12.14 | 14.94 | 21.84 | 25.61 | 35.35 | -0.289                           | 0.502 | 4.99 | 5.87 | 6.4  | 8.06  | 9.28  | 12.18    | 16.2  | 18.99 | 25.05 | 27.98 | 34.7  |
| 14.5 | -0.155                             | 0.411 | 3.22 | 3.82 | 4.19 | 5.4  | 6.34 | 8.74     | 12.43 | 15.26 | 22.2  | 25.98 | 35.68 | -0.288                           | 0.497 | 5.31 | 6.24 | 6.81 | 8.57  | 9.87  | 12.94    | 17.18 | 20.1  | 26.41 | 29.45 | 36.38 |
| 15   | -0.144                             | 0.408 | 3.32 | 3.93 | 4.32 | 5.56 | 6.52 | 8.95     | 12.7  | 15.56 | 22.54 | 26.32 | 36    | -0.287                           | 0.493 | 5.59 | 6.57 | 7.17 | 9.03  | 10.39 | 13.61    | 18.03 | 21.06 | 27.58 | 30.71 | 37.79 |
| 15.5 | -0.134                             | 0.406 | 3.42 | 4.04 | 4.43 | 5.7  | 6.67 | 9.15     | 12.94 | 15.83 | 22.86 | 26.65 | 36.33 | -0.287                           | 0.489 | 5.83 | 6.85 | 7.48 | 9.41  | 10.83 | 14.17    | 18.73 | 21.85 | 28.52 | 31.7  | 38.89 |
| 16   | -0.125                             | 0.404 | 3.5  | 4.14 | 4.54 | 5.82 | 6.82 | 9.33     | 13.17 | 16.09 | 23.16 | 26.97 | 36.66 | -0.286                           | 0.487 | 6.01 | 7.07 | 7.71 | 9.71  | 11.17 | 14.6     | 19.25 | 22.43 | 29.19 | 32.4  | 39.62 |
| 16.5 | -0.115                             | 0.401 | 3.57 | 4.22 | 4.63 | 5.94 | 6.95 | 9.5      | 13.39 | 16.34 | 23.47 | 27.29 | 37.01 | -0.283                           | 0.485 | 6.13 | 7.21 | 7.87 | 9.91  | 11.4  | 14.88    | 19.59 | 22.79 | 29.57 | 32.79 | 39.98 |
| 17   | -0.106                             | 0.4   | 3.63 | 4.29 | 4.71 | 6.04 | 7.07 | 9.66     | 13.6  | 16.58 | 23.78 | 27.64 | 37.42 | -0.281                           | 0.484 | 6.19 | 7.29 | 7.96 | 10.02 | 11.52 | 15.02    | 19.75 | 22.94 | 29.69 | 32.87 | 39.97 |
| 17.5 | -0.097                             | 0.398 | 3.68 | 4.36 | 4.78 | 6.14 | 7.18 | 9.81     | 13.81 | 16.83 | 24.12 | 28.03 | 37.91 | -0.278                           | 0.483 | 6.2  | 7.3  | 7.97 | 10.04 | 11.54 | 15.03    | 19.73 | 22.89 | 29.55 | 32.68 | 39.63 |
| 18   | -0.089                             | 0.396 | 3.72 | 4.41 | 4.84 | 6.23 | 7.29 | 9.96     | 14.03 | 17.1  | 24.5  | 28.47 | 38.54 | -0.274                           | 0.483 | 6.16 | 7.26 | 7.93 | 9.98  | 11.47 | 14.93    | 19.57 | 22.68 | 29.2  | 32.26 | 39.03 |

Part 2. Body composition by multifrequency bioimpedance.

Supplementary Table 16. Smoothed percentiles for mBIA total FFM, for female and male 5 to 18 years.

| Age  | BIA Fat free mass (kg)             |       |       |       |       |       |       |          |       |       |       |       |       |        |                                  |       |       |       |       |       |          |       |       |       |       |       |
|------|------------------------------------|-------|-------|-------|-------|-------|-------|----------|-------|-------|-------|-------|-------|--------|----------------------------------|-------|-------|-------|-------|-------|----------|-------|-------|-------|-------|-------|
|      | Female LMS parameters and centiles |       |       |       |       |       |       |          |       |       |       |       |       |        | Male LMS parameters and centiles |       |       |       |       |       |          |       |       |       |       |       |
|      | L                                  | S     | 1th   | 3th   | 5th   | 15th  | 25th  | 50th (M) | 75th  | 85th  | 95th  | 97th  | 99th  | L      | S                                | 1th   | 3th   | 5th   | 15th  | 25th  | 50th (M) | 75th  | 85th  | 95th  | 97th  | 99th  |
| 5    | -1.339                             | 0.103 | 12.02 | 12.45 | 12.7  | 13.39 | 13.85 | 14.8     | 15.93 | 16.62 | 17.95 | 18.54 | 19.78 | -0.548 | 0.102                            | 12.49 | 12.82 | 13.01 | 13.62 | 14.09 | 15.22    | 16.49 | 17.11 | 18.05 | 18.39 | 18.98 |
| 5.5  | -1.263                             | 0.1   | 12.87 | 13.33 | 13.59 | 14.31 | 14.79 | 15.78    | 16.93 | 17.63 | 18.96 | 19.55 | 20.77 | -0.509 | 0.096                            | 13.35 | 13.71 | 13.93 | 14.58 | 15.05 | 16.17    | 17.41 | 18.04 | 19    | 19.35 | 19.99 |
| 6    | -1.193                             | 0.099 | 13.49 | 13.98 | 14.25 | 15.02 | 15.51 | 16.55    | 17.74 | 18.47 | 19.84 | 20.44 | 21.68 | -0.474 | 0.094                            | 14.21 | 14.62 | 14.86 | 15.57 | 16.07 | 17.21    | 18.48 | 19.12 | 20.15 | 20.54 | 21.25 |
| 6.5  | -1.129                             | 0.102 | 13.94 | 14.46 | 14.76 | 15.57 | 16.11 | 17.22    | 18.5  | 19.28 | 20.76 | 21.4  | 22.73 | -0.442 | 0.094                            | 15    | 15.47 | 15.73 | 16.51 | 17.05 | 18.23    | 19.54 | 20.23 | 21.35 | 21.77 | 22.58 |
| 7    | -1.07                              | 0.108 | 14.4  | 14.97 | 15.29 | 16.19 | 16.77 | 18       | 19.42 | 20.29 | 21.94 | 22.66 | 24.15 | -0.412 | 0.095                            | 15.69 | 16.21 | 16.51 | 17.36 | 17.93 | 19.18    | 20.56 | 21.29 | 22.51 | 22.99 | 23.89 |
| 7.5  | -1.015                             | 0.116 | 14.92 | 15.55 | 15.9  | 16.9  | 17.56 | 18.93    | 20.54 | 21.52 | 23.39 | 24.22 | 25.93 | -0.385 | 0.098                            | 16.28 | 16.86 | 17.19 | 18.13 | 18.76 | 20.1     | 21.57 | 22.37 | 23.73 | 24.27 | 25.29 |
| 8    | -0.963                             | 0.123 | 15.48 | 16.18 | 16.57 | 17.68 | 18.41 | 19.94    | 21.75 | 22.86 | 24.99 | 25.93 | 27.9  | -0.359 | 0.104                            | 16.87 | 17.53 | 17.9  | 18.95 | 19.65 | 21.13    | 22.76 | 23.66 | 25.2  | 25.81 | 26.99 |
| 8.5  | -0.914                             | 0.13  | 16.08 | 16.84 | 17.28 | 18.5  | 19.31 | 21.01    | 23.02 | 24.26 | 26.66 | 27.72 | 29.95 | -0.334 | 0.112                            | 17.47 | 18.22 | 18.64 | 19.83 | 20.61 | 22.27    | 24.11 | 25.14 | 26.92 | 27.63 | 29.01 |
| 9    | -0.869                             | 0.137 | 16.73 | 17.56 | 18.04 | 19.38 | 20.27 | 22.15    | 24.39 | 25.77 | 28.46 | 29.65 | 32.16 | -0.311 | 0.12                             | 18.05 | 18.89 | 19.36 | 20.69 | 21.57 | 23.44    | 25.52 | 26.68 | 28.72 | 29.54 | 31.14 |
| 9.5  | -0.825                             | 0.144 | 17.42 | 18.34 | 18.86 | 20.33 | 21.32 | 23.4     | 25.88 | 27.42 | 30.42 | 31.76 | 34.58 | -0.29  | 0.128                            | 18.67 | 19.59 | 20.11 | 21.58 | 22.56 | 24.63    | 26.96 | 28.27 | 30.56 | 31.48 | 33.29 |
| 10   | -0.784                             | 0.15  | 18.18 | 19.18 | 19.75 | 21.37 | 22.45 | 24.74    | 27.49 | 29.2  | 32.54 | 34.03 | 37.19 | -0.269 | 0.135                            | 19.36 | 20.36 | 20.93 | 22.54 | 23.62 | 25.93    | 28.53 | 29.99 | 32.55 | 33.58 | 35.6  |
| 10.5 | -0.745                             | 0.155 | 19.02 | 20.11 | 20.73 | 22.5  | 23.68 | 26.18    | 29.2  | 31.07 | 34.75 | 36.38 | 39.86 | -0.249 | 0.142                            | 20.09 | 21.18 | 21.8  | 23.57 | 24.77 | 27.35    | 30.27 | 31.91 | 34.77 | 35.93 | 38.19 |
| 11   | -0.708                             | 0.157 | 20.03 | 21.2  | 21.87 | 23.77 | 25.04 | 27.74    | 30.97 | 32.98 | 36.91 | 38.66 | 42.37 | -0.231 | 0.151                            | 20.86 | 22.05 | 22.73 | 24.68 | 26.01 | 28.9     | 32.2  | 34.05 | 37.27 | 38.57 | 41.11 |
| 11.5 | -0.673                             | 0.156 | 21.24 | 22.48 | 23.19 | 25.2  | 26.54 | 29.37    | 32.76 | 34.85 | 38.92 | 40.71 | 44.5  | -0.213 | 0.159                            | 21.73 | 23.02 | 23.76 | 25.9  | 27.37 | 30.61    | 34.32 | 36.4  | 40.01 | 41.46 | 44.3  |
| 12   | -0.638                             | 0.151 | 22.61 | 23.91 | 24.65 | 26.74 | 28.12 | 31.03    | 34.47 | 36.58 | 40.65 | 42.43 | 46.16 | -0.196 | 0.165                            | 22.78 | 24.17 | 24.97 | 27.3  | 28.91 | 32.49    | 36.61 | 38.91 | 42.89 | 44.49 | 47.59 |
| 12.5 | -0.606                             | 0.144 | 24.04 | 25.38 | 26.14 | 28.27 | 29.67 | 32.6     | 36.03 | 38.11 | 42.08 | 43.81 | 47.38 | -0.179 | 0.168                            | 24.14 | 25.61 | 26.47 | 28.96 | 30.7  | 34.58    | 39.05 | 41.52 | 45.79 | 47.48 | 50.78 |
| 13   | -0.574                             | 0.136 | 25.41 | 26.77 | 27.53 | 29.68 | 31.09 | 34       | 37.37 | 39.4  | 43.23 | 44.87 | 48.26 | -0.164 | 0.165                            | 25.87 | 27.42 | 28.32 | 30.94 | 32.77 | 36.87    | 41.58 | 44.16 | 48.58 | 50.33 | 53.7  |
| 13.5 | -0.544                             | 0.129 | 26.62 | 28    | 28.77 | 30.91 | 32.31 | 35.18    | 38.48 | 40.44 | 44.12 | 45.68 | 48.88 | -0.148 | 0.159                            | 27.92 | 29.52 | 30.45 | 33.16 | 35.06 | 39.3     | 44.14 | 46.77 | 51.23 | 52.98 | 56.33 |
| 14   | -0.515                             | 0.124 | 27.65 | 29.03 | 29.8  | 31.94 | 33.32 | 36.16    | 39.37 | 41.28 | 44.82 | 46.31 | 49.35 | -0.134 | 0.152                            | 30.13 | 31.76 | 32.71 | 35.48 | 37.41 | 41.72    | 46.61 | 49.25 | 53.66 | 55.38 | 58.65 |
| 14.5 | -0.487                             | 0.119 | 28.48 | 29.86 | 30.63 | 32.76 | 34.14 | 36.94    | 40.1  | 41.96 | 45.4  | 46.85 | 49.77 | -0.12  | 0.144                            | 32.27 | 33.92 | 34.88 | 37.67 | 39.61 | 43.94    | 48.81 | 51.41 | 55.73 | 57.39 | 60.55 |
| 15   | -0.46                              | 0.116 | 29.11 | 30.5  | 31.28 | 33.42 | 34.79 | 37.58    | 40.71 | 42.55 | 45.92 | 47.34 | 50.19 | -0.106 | 0.136                            | 34.18 | 35.83 | 36.79 | 39.57 | 41.51 | 45.82    | 50.64 | 53.19 | 57.38 | 58.99 | 62.02 |
| 15.5 | -0.434                             | 0.115 | 29.58 | 30.99 | 31.77 | 33.92 | 35.31 | 38.11    | 41.24 | 43.07 | 46.42 | 47.83 | 50.64 | -0.093 | 0.13                             | 35.77 | 37.42 | 38.37 | 41.13 | 43.06 | 47.34    | 52.08 | 54.57 | 58.65 | 60.2  | 63.11 |
| 16   | -0.408                             | 0.115 | 29.91 | 31.34 | 32.13 | 34.31 | 35.71 | 38.54    | 41.69 | 43.54 | 46.9  | 48.31 | 51.13 | -0.08  | 0.126                            | 37.02 | 38.66 | 39.6  | 42.35 | 44.27 | 48.52    | 53.21 | 55.66 | 59.63 | 61.14 | 63.96 |
| 16.5 | -0.384                             | 0.115 | 30.12 | 31.57 | 32.38 | 34.59 | 36.01 | 38.87    | 42.07 | 43.93 | 47.33 | 48.74 | 51.58 | -0.068 | 0.123                            | 38    | 39.63 | 40.57 | 43.32 | 45.23 | 49.48    | 54.16 | 56.58 | 60.5  | 61.98 | 64.74 |
| 17   | -0.36                              | 0.116 | 30.23 | 31.7  | 32.52 | 34.77 | 36.21 | 39.11    | 42.35 | 44.23 | 47.67 | 49.1  | 51.96 | -0.056 | 0.122                            | 38.75 | 40.39 | 41.34 | 44.1  | 46.03 | 50.32    | 55.04 | 57.47 | 61.39 | 62.86 | 65.59 |
| 17.5 | -0.337                             | 0.117 | 30.25 | 31.74 | 32.57 | 34.86 | 36.32 | 39.26    | 42.54 | 44.44 | 47.92 | 49.36 | 52.25 | -0.044 | 0.122                            | 39.35 | 41.01 | 41.97 | 44.77 | 46.74 | 51.12    | 55.93 | 58.4  | 62.37 | 63.85 | 66.6  |
| 18   | -0.314                             | 0.118 | 30.2  | 31.71 | 32.56 | 34.87 | 36.34 | 39.32    | 42.63 | 44.56 | 48.07 | 49.52 | 52.44 | -0.033 | 0.123                            | 39.85 | 41.54 | 42.52 | 45.4  | 47.41 | 51.93    | 56.89 | 59.43 | 63.49 | 65.01 | 67.82 |

Supplementary Table 17. Smoothed percentiles for mBIA total FM, for female and male 5 to 18 years.

| Age  | Female LMS parameters and centiles |       |      |      |      |       |       |          |       |       |       |       |       | Male LMS parameters and centiles |       |      |      |      |      |      |          |       |       |       |       |       |
|------|------------------------------------|-------|------|------|------|-------|-------|----------|-------|-------|-------|-------|-------|----------------------------------|-------|------|------|------|------|------|----------|-------|-------|-------|-------|-------|
|      | L                                  | S     | 1th  | 3th  | 5th  | 15th  | 25th  | 50th (M) | 75th  | 85th  | 95th  | 97th  | 99th  | L                                | S     | 1th  | 3th  | 5th  | 15th | 25th | 50th (M) | 75th  | 85th  | 95th  | 97th  | 99th  |
| 5    | -0.045                             | 0.591 | 0.66 | 0.84 | 0.97 | 1.37  | 1.68  | 2.5      | 3.74  | 4.66  | 6.76  | 7.83  | 10.34 | 0.975                            | 0.491 | 0.22 | 0.52 | 0.73 | 1.4  | 1.83 | 2.68     | 3.55  | 4.02  | 4.82  | 5.13  | 5.72  |
| 5.5  | -0.048                             | 0.541 | 0.84 | 1.06 | 1.2  | 1.64  | 1.99  | 2.86     | 4.13  | 5.05  | 7.1   | 8.11  | 10.47 | 0.759                            | 0.51  | 0.24 | 0.56 | 0.78 | 1.43 | 1.88 | 2.78     | 3.77  | 4.34  | 5.32  | 5.71  | 6.47  |
| 6    | -0.05                              | 0.506 | 1.03 | 1.27 | 1.42 | 1.92  | 2.29  | 3.22     | 4.54  | 5.47  | 7.53  | 8.53  | 10.82 | 0.573                            | 0.53  | 0.36 | 0.68 | 0.88 | 1.53 | 1.98 | 2.95     | 4.08  | 4.75  | 5.97  | 6.48  | 7.49  |
| 6.5  | -0.05                              | 0.496 | 1.16 | 1.43 | 1.61 | 2.15  | 2.56  | 3.57     | 5.01  | 6.02  | 8.22  | 9.29  | 11.74 | 0.421                            | 0.552 | 0.5  | 0.82 | 1.02 | 1.66 | 2.13 | 3.19     | 4.5   | 5.32  | 6.87  | 7.54  | 8.89  |
| 7    | -0.048                             | 0.515 | 1.23 | 1.53 | 1.71 | 2.32  | 2.79  | 3.93     | 5.58  | 6.75  | 9.34  | 10.61 | 13.51 | 0.307                            | 0.575 | 0.63 | 0.95 | 1.15 | 1.82 | 2.33 | 3.52     | 5.08  | 6.09  | 8.08  | 8.96  | 10.8  |
| 7.5  | -0.043                             | 0.551 | 1.24 | 1.56 | 1.77 | 2.45  | 2.98  | 4.3      | 6.26  | 7.67  | 10.85 | 12.42 | 16.09 | 0.227                            | 0.598 | 0.74 | 1.07 | 1.29 | 2.02 | 2.58 | 3.94     | 5.79  | 7.03  | 9.57  | 10.72 | 13.19 |
| 8    | -0.037                             | 0.586 | 1.24 | 1.59 | 1.82 | 2.57  | 3.17  | 4.69     | 6.98  | 8.66  | 12.5  | 14.44 | 18.98 | 0.173                            | 0.617 | 0.85 | 1.21 | 1.44 | 2.24 | 2.86 | 4.41     | 6.59  | 8.08  | 11.23 | 12.69 | 15.88 |
| 8.5  | -0.028                             | 0.606 | 1.28 | 1.66 | 1.91 | 2.74  | 3.4   | 5.11     | 7.7   | 9.63  | 14.04 | 16.27 | 21.54 | 0.133                            | 0.63  | 0.96 | 1.35 | 1.61 | 2.48 | 3.17 | 4.92     | 7.43  | 9.19  | 12.98 | 14.77 | 18.75 |
| 9    | -0.018                             | 0.609 | 1.38 | 1.8  | 2.07 | 2.98  | 3.71  | 5.58     | 8.43  | 10.53 | 15.34 | 17.76 | 23.44 | 0.1                              | 0.637 | 1.09 | 1.52 | 1.8  | 2.75 | 3.5  | 5.43     | 8.28  | 10.3  | 14.72 | 16.85 | 21.64 |
| 9.5  | -0.007                             | 0.596 | 1.54 | 2.01 | 2.31 | 3.31  | 4.11  | 6.14     | 9.19  | 11.41 | 16.43 | 18.93 | 24.75 | 0.072                            | 0.639 | 1.23 | 1.69 | 1.99 | 3.02 | 3.84 | 5.94     | 9.08  | 11.34 | 16.36 | 18.8  | 24.37 |
| 10   | 0.006                              | 0.575 | 1.77 | 2.29 | 2.62 | 3.73  | 4.59  | 6.77     | 9.98  | 12.28 | 17.41 | 19.92 | 25.7  | 0.049                            | 0.636 | 1.38 | 1.87 | 2.2  | 3.29 | 4.17 | 6.43     | 9.82  | 12.29 | 17.82 | 20.54 | 26.79 |
| 10.5 | 0.019                              | 0.55  | 2.05 | 2.63 | 3    | 4.21  | 5.15  | 7.47     | 10.81 | 13.17 | 18.33 | 20.82 | 26.46 | 0.031                            | 0.63  | 1.53 | 2.05 | 2.39 | 3.55 | 4.47 | 6.86     | 10.46 | 13.08 | 19.01 | 21.94 | 28.73 |
| 11   | 0.033                              | 0.523 | 2.38 | 3.03 | 3.44 | 4.77  | 5.78  | 8.24     | 11.7  | 14.1  | 19.25 | 21.7  | 27.17 | 0.019                            | 0.622 | 1.66 | 2.21 | 2.57 | 3.77 | 4.73 | 7.21     | 10.95 | 13.69 | 19.87 | 22.94 | 30.06 |
| 11.5 | 0.047                              | 0.495 | 2.79 | 3.51 | 3.97 | 5.41  | 6.5   | 9.09     | 12.66 | 15.09 | 20.21 | 22.61 | 27.9  | 0.013                            | 0.613 | 1.77 | 2.34 | 2.71 | 3.95 | 4.94 | 7.48     | 11.3  | 14.09 | 20.38 | 23.51 | 30.75 |
| 12   | 0.061                              | 0.466 | 3.27 | 4.07 | 4.57 | 6.14  | 7.3   | 10.03    | 13.7  | 16.15 | 21.22 | 23.56 | 28.66 | 0.014                            | 0.604 | 1.86 | 2.45 | 2.83 | 4.1  | 5.11 | 7.69     | 11.54 | 14.33 | 20.61 | 23.72 | 30.9  |
| 12.5 | 0.076                              | 0.438 | 3.81 | 4.7  | 5.25 | 6.94  | 8.17  | 11.02    | 14.76 | 17.22 | 22.23 | 24.52 | 29.42 | 0.02                             | 0.594 | 1.93 | 2.54 | 2.93 | 4.22 | 5.25 | 7.85     | 11.7  | 14.47 | 20.65 | 23.69 | 30.67 |
| 13   | 0.091                              | 0.412 | 4.41 | 5.38 | 5.97 | 7.77  | 9.07  | 12.02    | 15.81 | 18.27 | 23.2  | 25.42 | 30.14 | 0.031                            | 0.583 | 2    | 2.62 | 3.02 | 4.34 | 5.38 | 8        | 11.83 | 14.56 | 20.59 | 23.53 | 30.22 |
| 13.5 | 0.106                              | 0.388 | 5.02 | 6.07 | 6.7  | 8.6   | 9.95  | 12.97    | 16.8  | 19.24 | 24.08 | 26.22 | 30.75 | 0.045                            | 0.572 | 2.07 | 2.71 | 3.12 | 4.47 | 5.53 | 8.16     | 11.96 | 14.64 | 20.5  | 23.32 | 29.7  |
| 14   | 0.121                              | 0.368 | 5.61 | 6.73 | 7.39 | 9.37  | 10.76 | 13.84    | 17.68 | 20.09 | 24.81 | 26.89 | 31.24 | 0.062                            | 0.56  | 2.14 | 2.8  | 3.23 | 4.61 | 5.69 | 8.34     | 12.11 | 14.75 | 20.43 | 23.14 | 29.2  |
| 14.5 | 0.136                              | 0.35  | 6.16 | 7.33 | 8.02 | 10.06 | 11.48 | 14.6     | 18.42 | 20.8  | 25.41 | 27.42 | 31.6  | 0.081                            | 0.548 | 2.22 | 2.91 | 3.35 | 4.78 | 5.87 | 8.55     | 12.3  | 14.89 | 20.41 | 23.01 | 28.77 |
| 15   | 0.15                               | 0.336 | 6.63 | 7.84 | 8.55 | 10.64 | 12.09 | 15.22    | 19.01 | 21.36 | 25.87 | 27.82 | 31.85 | 0.102                            | 0.536 | 2.32 | 3.03 | 3.49 | 4.96 | 6.08 | 8.78     | 12.52 | 15.08 | 20.43 | 22.93 | 28.41 |
| 15.5 | 0.165                              | 0.325 | 7    | 8.24 | 8.97 | 11.1  | 12.56 | 15.7     | 19.47 | 21.79 | 26.21 | 28.11 | 32.02 | 0.124                            | 0.524 | 2.42 | 3.16 | 3.64 | 5.16 | 6.3  | 9.05     | 12.78 | 15.3  | 20.51 | 22.92 | 28.15 |
| 16   | 0.18                               | 0.318 | 7.26 | 8.53 | 9.27 | 11.43 | 12.9  | 16.05    | 19.81 | 22.1  | 26.45 | 28.31 | 32.13 | 0.147                            | 0.512 | 2.52 | 3.31 | 3.8  | 5.38 | 6.55 | 9.34     | 13.08 | 15.57 | 20.66 | 22.99 | 28    |
| 16.5 | 0.194                              | 0.313 | 7.42 | 8.7  | 9.45 | 11.63 | 13.11 | 16.26    | 20.01 | 22.28 | 26.58 | 28.41 | 32.15 | 0.17                             | 0.5   | 2.64 | 3.47 | 3.98 | 5.62 | 6.83 | 9.67     | 13.42 | 15.89 | 20.88 | 23.14 | 27.95 |
| 17   | 0.208                              | 0.311 | 7.47 | 8.77 | 9.53 | 11.72 | 13.2  | 16.36    | 20.09 | 22.35 | 26.59 | 28.4  | 32.09 | 0.195                            | 0.49  | 2.77 | 3.63 | 4.17 | 5.87 | 7.12 | 10.02    | 13.79 | 16.25 | 21.16 | 23.36 | 28.02 |
| 17.5 | 0.222                              | 0.311 | 7.44 | 8.75 | 9.51 | 11.71 | 13.2  | 16.36    | 20.08 | 22.32 | 26.54 | 28.33 | 31.97 | 0.219                            | 0.479 | 2.9  | 3.81 | 4.38 | 6.14 | 7.43 | 10.39    | 14.21 | 16.66 | 21.51 | 23.67 | 28.19 |
| 18   | 0.236                              | 0.312 | 7.35 | 8.66 | 9.42 | 11.64 | 13.13 | 16.29    | 20    | 22.25 | 26.44 | 28.22 | 31.83 | 0.243                            | 0.47  | 3.03 | 3.99 | 4.59 | 6.43 | 7.76 | 10.79    | 14.65 | 17.1  | 21.91 | 24.03 | 28.45 |

Supplementary Table 18. Smoothed percentiles for mBIA total body water (TBW), for female and male 5 to 18 years.

| Age  | Female LMS parameters and percentile |       |       |       |       |       |       |          |       |       |       |       |       | Male LMS parameters and percentile |       |       |       |       |       |       |          |       |       |       |       |       |
|------|--------------------------------------|-------|-------|-------|-------|-------|-------|----------|-------|-------|-------|-------|-------|------------------------------------|-------|-------|-------|-------|-------|-------|----------|-------|-------|-------|-------|-------|
|      | L                                    | S     | 1th   | 3th   | 5th   | 15th  | 25th  | 50th (M) | 75th  | 85th  | 95th  | 97th  | 99th  | L                                  | S     | 1th   | 3th   | 5th   | 15th  | 25th  | 50th (M) | 75th  | 85th  | 95th  | 97th  | 99th  |
| 5    | -1.345                               | 0.121 | 8.37  | 8.71  | 8.9   | 9.46  | 9.83  | 10.62    | 11.58 | 12.19 | 13.39 | 13.94 | 15.13 | 0.835                              | 0.11  | 8.88  | 9.19  | 9.37  | 9.93  | 10.35 | 11.33    | 12.32 | 12.75 | 13.34 | 13.53 | 13.86 |
| 5.5  | -1.241                               | 0.114 | 9.03  | 9.39  | 9.6   | 10.17 | 10.55 | 11.35    | 12.31 | 12.9  | 14.04 | 14.55 | 15.64 | 0.564                              | 0.105 | 9.5   | 9.83  | 10.02 | 10.6  | 11.01 | 11.97    | 12.96 | 13.41 | 14.06 | 14.29 | 14.68 |
| 6    | -1.146                               | 0.11  | 9.55  | 9.93  | 10.14 | 10.74 | 11.14 | 11.96    | 12.93 | 13.52 | 14.66 | 15.16 | 16.21 | 0.293                              | 0.103 | 10.14 | 10.5  | 10.7  | 11.31 | 11.74 | 12.7     | 13.71 | 14.21 | 14.95 | 15.21 | 15.68 |
| 6.5  | -1.058                               | 0.112 | 9.93  | 10.34 | 10.57 | 11.21 | 11.63 | 12.51    | 13.53 | 14.16 | 15.36 | 15.88 | 16.98 | 0.007                              | 0.103 | 10.77 | 11.15 | 11.37 | 12.02 | 12.47 | 13.45    | 14.52 | 15.05 | 15.91 | 16.22 | 16.8  |
| 7    | -0.977                               | 0.118 | 10.28 | 10.73 | 10.98 | 11.68 | 12.15 | 13.12    | 14.25 | 14.94 | 16.27 | 16.84 | 18.05 | -0.266                             | 0.105 | 11.34 | 11.76 | 12    | 12.68 | 13.15 | 14.17    | 15.3  | 15.89 | 16.87 | 17.25 | 17.96 |
| 7.5  | -0.901                               | 0.126 | 10.66 | 11.15 | 11.43 | 12.22 | 12.73 | 13.82    | 15.09 | 15.87 | 17.37 | 18.03 | 19.4  | -0.487                             | 0.108 | 11.86 | 12.3  | 12.56 | 13.29 | 13.79 | 14.87    | 16.09 | 16.75 | 17.89 | 18.33 | 19.19 |
| 8    | -0.83                                | 0.133 | 11.07 | 11.61 | 11.92 | 12.79 | 13.37 | 14.58    | 16    | 16.88 | 18.56 | 19.3  | 20.85 | -0.645                             | 0.113 | 12.37 | 12.85 | 13.13 | 13.92 | 14.46 | 15.64    | 16.98 | 17.73 | 19.04 | 19.57 | 20.61 |
| 8.5  | -0.764                               | 0.139 | 11.52 | 12.12 | 12.46 | 13.42 | 14.05 | 15.39    | 16.96 | 17.93 | 19.79 | 20.61 | 22.33 | -0.72                              | 0.12  | 12.89 | 13.41 | 13.71 | 14.58 | 15.17 | 16.47    | 17.98 | 18.83 | 20.35 | 20.97 | 22.2  |
| 9    | -0.701                               | 0.145 | 12.01 | 12.67 | 13.04 | 14.09 | 14.79 | 16.26    | 17.99 | 19.05 | 21.1  | 22    | 23.88 | -0.689                             | 0.127 | 13.38 | 13.95 | 14.28 | 15.24 | 15.89 | 17.34    | 19.02 | 19.98 | 21.69 | 22.39 | 23.79 |
| 9.5  | -0.642                               | 0.15  | 12.55 | 13.27 | 13.67 | 14.83 | 15.59 | 17.2     | 19.1  | 20.27 | 22.52 | 23.5  | 25.56 | -0.557                             | 0.133 | 13.87 | 14.5  | 14.87 | 15.93 | 16.65 | 18.26    | 20.12 | 21.17 | 23.03 | 23.78 | 25.27 |
| 10   | -0.586                               | 0.156 | 13.12 | 13.9  | 14.35 | 15.61 | 16.45 | 18.22    | 20.3  | 21.58 | 24.04 | 25.11 | 27.36 | -0.356                             | 0.139 | 14.38 | 15.09 | 15.5  | 16.68 | 17.49 | 19.28    | 21.33 | 22.46 | 24.43 | 25.21 | 26.74 |
| 10.5 | -0.532                               | 0.16  | 13.74 | 14.6  | 15.08 | 16.46 | 17.37 | 19.29    | 21.55 | 22.94 | 25.59 | 26.75 | 29.17 | -0.12                              | 0.145 | 14.91 | 15.7  | 16.16 | 17.49 | 18.4  | 20.4     | 22.66 | 23.87 | 25.93 | 26.74 | 28.27 |
| 11   | -0.481                               | 0.16  | 14.48 | 15.4  | 15.93 | 17.4  | 18.37 | 20.42    | 22.82 | 24.28 | 27.08 | 28.29 | 30.82 | 0.122                              | 0.151 | 15.44 | 16.34 | 16.86 | 18.36 | 19.39 | 21.63    | 24.1  | 25.4  | 27.55 | 28.37 | 29.91 |
| 11.5 | -0.432                               | 0.157 | 15.38 | 16.35 | 16.9  | 18.45 | 19.47 | 21.59    | 24.07 | 25.56 | 28.4  | 29.62 | 32.14 | 0.343                              | 0.155 | 16    | 17.03 | 17.62 | 19.31 | 20.46 | 22.96    | 25.65 | 27.04 | 29.26 | 30.1  | 31.65 |
| 12   | -0.386                               | 0.15  | 16.42 | 17.42 | 17.99 | 19.58 | 20.62 | 22.76    | 25.23 | 26.71 | 29.48 | 30.66 | 33.08 | 0.524                              | 0.158 | 16.69 | 17.84 | 18.49 | 20.36 | 21.63 | 24.38    | 27.27 | 28.73 | 31.03 | 31.88 | 33.44 |
| 12.5 | -0.341                               | 0.14  | 17.51 | 18.53 | 19.1  | 20.7  | 21.74 | 23.86    | 26.27 | 27.7  | 30.35 | 31.46 | 33.73 | 0.648                              | 0.158 | 17.6  | 18.85 | 19.56 | 21.58 | 22.95 | 25.89    | 28.95 | 30.46 | 32.82 | 33.68 | 35.24 |
| 13   | -0.298                               | 0.131 | 18.55 | 19.57 | 20.15 | 21.73 | 22.75 | 24.82    | 27.15 | 28.51 | 31.01 | 32.06 | 34.16 | 0.706                              | 0.154 | 18.83 | 20.14 | 20.88 | 22.99 | 24.42 | 27.49    | 30.65 | 32.21 | 34.6  | 35.47 | 37.04 |
| 13.5 | -0.257                               | 0.122 | 19.48 | 20.5  | 21.07 | 22.63 | 23.62 | 25.64    | 27.87 | 29.16 | 31.52 | 32.5  | 34.45 | 0.701                              | 0.148 | 20.33 | 21.65 |       |       |       |          |       |       |       |       |       |

Supplementary Table 19. Smoothed percentiles for mBIA Truncal Fat Mass (kg), for female and male 5 to 18 years.

| BIA Truncal FM (kg) |                                    |       |      |      |      |      |      |          |       |       |       |       |       |                                  |       |      |      |      |      |      |          |      |       |       |       |       |
|---------------------|------------------------------------|-------|------|------|------|------|------|----------|-------|-------|-------|-------|-------|----------------------------------|-------|------|------|------|------|------|----------|------|-------|-------|-------|-------|
| Age (years)         | Female LMS parameters and centiles |       |      |      |      |      |      |          |       |       |       |       |       | Male LMS parameters and centiles |       |      |      |      |      |      |          |      |       |       |       |       |
|                     | L                                  | S     | 1th  | 3th  | 5th  | 15th | 25th | 50th (M) | 75th  | 85th  | 95th  | 97th  | 99th  | L                                | S     | 1th  | 3th  | 5th  | 15th | 25th | 50th (M) | 75th | 85th  | 95th  | 97th  | 99th  |
| 5                   | -0.578                             | 0.365 | 0.96 | 1.08 | 1.15 | 1.36 | 1.53 | 1.92     | 2.51  | 2.94  | 4.02  | 4.61  | 6.18  | 0.573                            | 0.385 | 0.47 | 0.62 | 0.71 | 0.96 | 1.14 | 1.54     | 1.98 | 2.23  | 2.63  | 2.79  | 3.09  |
| 5.5                 | -0.517                             | 0.378 | 0.99 | 1.12 | 1.19 | 1.43 | 1.61 | 2.04     | 2.69  | 3.17  | 4.32  | 4.95  | 6.6   | 0.416                            | 0.405 | 0.55 | 0.7  | 0.79 | 1.07 | 1.26 | 1.72     | 2.25 | 2.55  | 3.08  | 3.29  | 3.71  |
| 6                   | -0.462                             | 0.391 | 1.03 | 1.16 | 1.25 | 1.51 | 1.71 | 2.19     | 2.91  | 3.44  | 4.71  | 5.39  | 7.14  | 0.274                            | 0.426 | 0.63 | 0.78 | 0.87 | 1.17 | 1.38 | 1.9      | 2.53 | 2.91  | 3.59  | 3.87  | 4.43  |
| 6.5                 | -0.412                             | 0.407 | 1.06 | 1.21 | 1.31 | 1.6  | 1.82 | 2.36     | 3.16  | 3.75  | 5.17  | 5.92  | 7.84  | 0.152                            | 0.45  | 0.69 | 0.85 | 0.95 | 1.26 | 1.5  | 2.08     | 2.83 | 3.3   | 4.17  | 4.55  | 5.32  |
| 7                   | -0.365                             | 0.424 | 1.1  | 1.26 | 1.37 | 1.69 | 1.94 | 2.54     | 3.44  | 4.11  | 5.69  | 6.54  | 8.65  | 0.053                            | 0.475 | 0.75 | 0.92 | 1.02 | 1.36 | 1.61 | 2.26     | 3.15 | 3.72  | 4.85  | 5.35  | 6.4   |
| 7.5                 | -0.321                             | 0.441 | 1.13 | 1.31 | 1.43 | 1.79 | 2.06 | 2.74     | 3.74  | 4.49  | 6.25  | 7.18  | 9.5   | -0.022                           | 0.501 | 0.8  | 0.97 | 1.08 | 1.44 | 1.72 | 2.45     | 3.48 | 4.17  | 5.6   | 6.26  | 7.69  |
| 8                   | -0.28                              | 0.455 | 1.16 | 1.37 | 1.49 | 1.89 | 2.19 | 2.94     | 4.05  | 4.87  | 6.8   | 7.81  | 10.31 | -0.075                           | 0.525 | 0.84 | 1.03 | 1.14 | 1.53 | 1.83 | 2.63     | 3.82 | 4.65  | 6.41  | 7.25  | 9.13  |
| 8.5                 | -0.242                             | 0.464 | 1.21 | 1.43 | 1.57 | 2    | 2.33 | 3.16     | 4.37  | 5.26  | 7.33  | 8.41  | 11.02 | -0.11                            | 0.546 | 0.89 | 1.08 | 1.2  | 1.61 | 1.94 | 2.82     | 4.17 | 5.13  | 7.24  | 8.28  | 10.67 |
| 9                   | -0.206                             | 0.468 | 1.27 | 1.52 | 1.67 | 2.14 | 2.51 | 3.4      | 4.72  | 5.68  | 7.88  | 9     | 11.69 | -0.132                           | 0.564 | 0.93 | 1.13 | 1.26 | 1.7  | 2.05 | 3.01     | 4.51 | 5.6   | 8.07  | 9.31  | 12.21 |
| 9.5                 | -0.172                             | 0.469 | 1.36 | 1.63 | 1.8  | 2.32 | 2.72 | 3.71     | 5.13  | 6.15  | 8.47  | 9.64  | 12.4  | -0.143                           | 0.577 | 0.97 | 1.18 | 1.32 | 1.79 | 2.17 | 3.21     | 4.85 | 6.06  | 8.86  | 10.28 | 13.67 |
| 10                  | -0.139                             | 0.466 | 1.48 | 1.78 | 1.96 | 2.55 | 2.99 | 4.07     | 5.61  | 6.7   | 9.15  | 10.36 | 13.18 | -0.146                           | 0.586 | 1.01 | 1.23 | 1.38 | 1.88 | 2.29 | 3.4      | 5.17 | 6.5   | 9.58  | 11.16 | 14.96 |
| 10.5                | -0.108                             | 0.461 | 1.62 | 1.95 | 2.16 | 2.81 | 3.3  | 4.48     | 6.14  | 7.31  | 9.88  | 11.13 | 14    | -0.14                            | 0.592 | 1.05 | 1.29 | 1.45 | 1.98 | 2.41 | 3.59     | 5.49 | 6.9   | 10.21 | 11.91 | 16.01 |
| 11                  | -0.079                             | 0.454 | 1.79 | 2.16 | 2.39 | 3.11 | 3.65 | 4.94     | 6.73  | 7.97  | 10.66 | 11.95 | 14.87 | -0.129                           | 0.595 | 1.09 | 1.34 | 1.51 | 2.07 | 2.54 | 3.79     | 5.79 | 7.28  | 10.76 | 12.54 | 16.82 |
| 11.5                | -0.051                             | 0.446 | 1.98 | 2.39 | 2.65 | 3.44 | 4.03 | 5.43     | 7.36  | 8.67  | 11.47 | 12.79 | 15.76 | -0.111                           | 0.596 | 1.12 | 1.4  | 1.58 | 2.18 | 2.67 | 3.99     | 6.08 | 7.63  | 11.22 | 13.05 | 17.4  |
| 12                  | -0.024                             | 0.436 | 2.19 | 2.65 | 2.93 | 3.8  | 4.45 | 5.96     | 8.01  | 9.39  | 12.29 | 13.65 | 16.64 | -0.089                           | 0.594 | 1.16 | 1.45 | 1.64 | 2.28 | 2.8  | 4.19     | 6.36 | 7.96  | 11.61 | 13.44 | 17.8  |
| 12.5                | 0.002                              | 0.425 | 2.42 | 2.92 | 3.23 | 4.19 | 4.88 | 6.51     | 8.67  | 10.11 | 13.09 | 14.47 | 17.49 | -0.063                           | 0.59  | 1.2  | 1.51 | 1.71 | 2.39 | 2.93 | 4.39     | 6.63 | 8.25  | 11.92 | 13.74 | 17.98 |
| 13                  | 0.027                              | 0.414 | 2.65 | 3.2  | 3.54 | 4.57 | 5.32 | 7.04     | 9.31  | 10.8  | 13.84 | 15.24 | 18.25 | -0.035                           | 0.584 | 1.24 | 1.57 | 1.79 | 2.5  | 3.08 | 4.59     | 6.88 | 8.53  | 12.17 | 13.96 | 18.05 |
| 13.5                | 0.051                              | 0.403 | 2.89 | 3.49 | 3.85 | 4.96 | 5.75 | 7.56     | 9.91  | 11.44 | 14.53 | 15.93 | 18.92 | -0.005                           | 0.577 | 1.28 | 1.64 | 1.86 | 2.62 | 3.22 | 4.79     | 7.13 | 8.78  | 12.37 | 14.11 | 18.04 |
| 14                  | 0.074                              | 0.392 | 3.13 | 3.77 | 4.16 | 5.33 | 6.17 | 8.06     | 10.47 | 12.03 | 15.14 | 16.53 | 19.49 | 0.027                            | 0.568 | 1.33 | 1.7  | 1.94 | 2.74 | 3.37 | 4.99     | 7.36 | 9.01  | 12.54 | 14.22 | 17.96 |
| 14.5                | 0.096                              | 0.382 | 3.36 | 4.04 | 4.45 | 5.68 | 6.55 | 8.51     | 10.97 | 12.54 | 15.65 | 17.04 | 19.95 | 0.061                            | 0.558 | 1.37 | 1.77 | 2.02 | 2.87 | 3.53 | 5.2      | 7.59 | 9.23  | 12.68 | 14.3  | 17.86 |
| 15                  | 0.117                              | 0.372 | 3.57 | 4.29 | 4.71 | 6    | 6.9  | 8.89     | 11.39 | 12.97 | 16.06 | 17.42 | 20.28 | 0.096                            | 0.548 | 1.41 | 1.83 | 2.11 | 2.99 | 3.68 | 5.4      | 7.82 | 9.44  | 12.81 | 14.37 | 17.74 |
| 15.5                | 0.138                              | 0.363 | 3.76 | 4.5  | 4.94 | 6.26 | 7.18 | 9.21     | 11.72 | 13.29 | 16.34 | 17.68 | 20.46 | 0.133                            | 0.538 | 1.45 | 1.9  | 2.19 | 3.12 | 3.84 | 5.61     | 8.04 | 9.65  | 12.93 | 14.43 | 17.63 |
| 16                  | 0.158                              | 0.354 | 3.91 | 4.67 | 5.13 | 6.47 | 7.4  | 9.44     | 11.94 | 13.49 | 16.49 | 17.79 | 20.49 | 0.171                            | 0.528 | 1.49 | 1.97 | 2.27 | 3.26 | 4.01 | 5.82     | 8.26 | 9.85  | 13.06 | 14.49 | 17.54 |
| 16.5                | 0.177                              | 0.346 | 4.02 | 4.8  | 5.26 | 6.62 | 7.56 | 9.59     | 12.06 | 13.59 | 16.51 | 17.77 | 20.38 | 0.21                             | 0.518 | 1.52 | 2.04 | 2.36 | 3.39 | 4.17 | 6.02     | 8.48 | 10.06 | 13.18 | 14.57 | 17.38 |
| 17                  | 0.196                              | 0.339 | 4.1  | 4.89 | 5.35 | 6.72 | 7.65 | 9.67     | 12.09 | 13.58 | 16.41 | 17.63 | 20.13 | 0.248                            | 0.509 | 1.56 | 2.1  | 2.44 | 3.53 | 4.33 | 6.23     | 8.7  | 10.27 | 13.33 | 14.67 | 17.45 |
| 17.5                | 0.215                              | 0.333 | 4.15 | 4.94 | 5.4  | 6.76 | 7.68 | 9.67     | 12.04 | 13.49 | 16.22 | 17.39 | 19.78 | 0.286                            | 0.5   | 1.59 | 2.16 | 2.52 | 3.66 | 4.5  | 6.44     | 8.92 | 10.48 | 13.48 | 14.78 | 17.47 |
| 18                  | 0.232                              | 0.326 | 4.17 | 4.96 | 5.42 | 6.76 | 7.68 | 9.62     | 11.93 | 13.33 | 15.96 | 17.08 | 19.36 | 0.323                            | 0.492 | 1.62 | 2.23 | 2.61 | 3.8  | 4.67 | 6.65     | 9.15 | 10.7  | 13.65 | 14.92 | 17.52 |

Supplementary Table 20. Smoothed percentiles for mBIA Appendicular Skeletal Muscle Mass (kg), for female and male 5 to 18 years.

| BIA ASMM (kg) |                                      |       |      |       |       |       |       |          |       |       |       |       |       |                                    |       |       |       |       |       |       |          |       |       |       |       |       |
|---------------|--------------------------------------|-------|------|-------|-------|-------|-------|----------|-------|-------|-------|-------|-------|------------------------------------|-------|-------|-------|-------|-------|-------|----------|-------|-------|-------|-------|-------|
| Age (years)   | Female LMS parameters and percentile |       |      |       |       |       |       |          |       |       |       |       |       | Male LMS parameters and percentile |       |       |       |       |       |       |          |       |       |       |       |       |
|               | L                                    | S     | 1th  | 3th   | 5th   | 15th  | 25th  | 50th (M) | 75th  | 85th  | 95th  | 97th  | 99th  | L                                  | S     | 1th   | 3th   | 5th   | 15th  | 25th  | 50th (M) | 75th  | 85th  | 95th  | 97th  | 99th  |
| 5             | -0.974                               | 0.165 | 3.05 | 3.22  | 3.32  | 3.61  | 3.8   | 4.23     | 4.76  | 5.1   | 5.8   | 6.13  | 6.85  | -0.337                             | 0.165 | 3.22  | 3.44  | 3.56  | 3.91  | 4.14  | 4.62     | 5.17  | 5.5   | 6.13  | 6.4   | 6.95  |
| 5.5           | -0.892                               | 0.154 | 3.39 | 3.57  | 3.68  | 3.98  | 4.19  | 4.63     | 5.16  | 5.5   | 6.17  | 6.47  | 7.13  | -0.286                             | 0.15  | 3.62  | 3.85  | 3.98  | 4.34  | 4.57  | 5.05     | 5.6   | 5.93  | 6.53  | 6.79  | 7.31  |
| 6             | -0.816                               | 0.149 | 3.66 | 3.85  | 3.97  | 4.29  | 4.5   | 4.96     | 5.51  | 5.85  | 6.52  | 6.82  | 7.45  | -0.24                              | 0.142 | 4.01  | 4.25  | 4.39  | 4.77  | 5.02  | 5.51     | 6.08  | 6.41  | 7.02  | 7.27  | 7.79  |
| 6.5           | -0.747                               | 0.151 | 3.85 | 4.06  | 4.19  | 4.53  | 4.77  | 5.26     | 5.84  | 6.21  | 6.92  | 7.23  | 7.9   | -0.197                             | 0.139 | 4.36  | 4.62  | 4.77  | 5.17  | 5.43  | 5.96     | 6.55  | 6.89  | 7.53  | 7.79  | 8.32  |
| 7             | -0.683                               | 0.158 | 4.03 | 4.26  | 4.4   | 4.79  | 5.04  | 5.59     | 6.24  | 6.65  | 7.44  | 7.79  | 8.54  | -0.158                             | 0.139 | 4.65  | 4.93  | 5.09  | 5.53  | 5.81  | 6.37     | 7     | 7.37  | 8.04  | 8.32  | 8.88  |
| 7.5           | -0.623                               | 0.168 | 4.22 | 4.49  | 4.64  | 5.07  | 5.37  | 5.99     | 6.73  | 7.19  | 8.1   | 8.5   | 9.36  | -0.121                             | 0.143 | 4.89  | 5.2   | 5.38  | 5.85  | 6.16  | 6.78     | 7.47  | 7.88  | 8.61  | 8.92  | 9.53  |
| 8             | -0.567                               | 0.177 | 4.43 | 4.73  | 4.9   | 5.39  | 5.72  | 6.42     | 7.27  | 7.8   | 8.83  | 9.3   | 10.28 | -0.087                             | 0.151 | 5.13  | 5.47  | 5.67  | 6.2   | 6.55  | 7.24     | 8.02  | 8.47  | 9.3   | 9.65  | 10.33 |
| 8.5           | -0.514                               | 0.186 | 4.67 | 5     | 5.19  | 5.74  | 6.11  | 6.9      | 7.85  | 8.45  | 9.61  | 10.13 | 11.24 | -0.055                             | 0.16  | 5.37  | 5.76  | 5.98  | 6.58  | 6.97  | 7.76     | 8.65  | 9.17  | 10.12 | 10.51 | 11.3  |
| 9             | -0.465                               | 0.193 | 4.92 | 5.29  | 5.5   | 6.11  | 6.53  | 7.41     | 8.47  | 9.14  | 10.45 | 11.03 | 12.27 | -0.024                             | 0.168 | 5.63  | 6.07  | 6.31  | 6.99  | 7.43  | 8.32     | 9.32  | 9.91  | 10.98 | 11.43 | 12.33 |
| 9.5           | -0.418                               | 0.201 | 5.2  | 5.61  | 5.85  | 6.53  | 6.98  | 7.97     | 9.16  | 9.9   | 11.36 | 12.01 | 13.39 | 0.005                              | 0.175 | 5.92  | 6.4   | 6.68  | 7.43  | 7.91  | 8.9      | 10.02 | 10.67 | 11.87 | 12.36 | 13.36 |
| 10            | -0.373                               | 0.207 | 5.51 | 5.96  | 6.22  | 6.97  | 7.48  | 8.57     | 9.9   | 10.72 | 12.34 | 13.06 | 14.58 | 0.032                              | 0.181 | 6.25  | 6.78  | 7.07  | 7.9   | 8.44  | 9.54     | 10.77 | 11.49 | 12.82 | 13.37 | 14.48 |
| 10.5          | -0.331                               | 0.211 | 5.85 | 6.35  | 6.64  | 7.47  | 8.03  | 9.23     | 10.68 | 11.58 | 13.35 | 14.13 | 15.78 | 0.058                              | 0.188 | 6.58  | 7.16  | 7.49  | 8.41  | 9.01  | 10.23    | 11.6  | 12.41 | 13.89 | 14.5  | 15.74 |
| 11            | -0.291                               | 0.212 | 6.27 | 6.81  | 7.13  | 8.03  | 8.63  | 9.93     | 11.49 | 12.45 | 14.33 | 15.16 | 16.89 | 0.083                              | 0.195 | 6.92  | 7.57  | 7.94  | 8.96  | 9.63  | 10.99    | 12.53 | 13.43 | 15.09 | 15.78 | 17.16 |
| 11.5          | -0.252                               | 0.207 | 6.77 | 7.35  | 7.69  | 8.65  | 9.29  | 10.66    | 12.29 | 13.29 | 15.22 | 16.06 | 17.82 | 0.106                              | 0.202 | 7.29  | 8.02  | 8.42  | 9.56  | 10.3  | 11.82    | 13.53 | 14.54 | 16.39 | 17.16 | 18.71 |
| 12            | -0.215                               | 0.198 | 7.35 | 7.97  | 8.32  | 9.33  | 10    | 11.4     | 13.06 | 14.07 | 15.98 | 16.81 | 18.52 | 0.129                              | 0.207 | 7.75  | 8.54  | 8.99  | 10.24 | 11.06 | 12.73    | 14.61 | 15.72 | 17.75 | 18.6  | 20.29 |
| 12.5          | -0.18                                | 0.187 | 7.97 | 8.61  | 8.98  | 10.01 | 10.69 | 12.11    | 13.75 | 14.74 | 16.61 | 17.4  | 19.03 | 0.151                              | 0.206 | 8.34  | 9.2   | 9.69  | 11.04 | 11.92 | 13.72    | 15.74 | 16.93 | 19.09 | 19.99 | 21.79 |
| 13            | -0.146                               | 0.175 | 8.58 | 9.24  | 9.61  | 10.65 | 11.33 | 12.74    | 14.35 | 15.31 | 17.1  | 17.86 | 19.39 | 0.172                              | 0.2   | 9.11  | 10.03 | 10.54 | 11.98 | 12.9  | 14.79    | 16.9  | 18.13 | 20.36 | 21.29 | 23.13 |
| 13.5          | -0.113                               | 0.165 | 9.13 | 9.8   | 10.17 | 11.22 | 11.9  | 13.28    | 14.86 | 15.78 | 17.49 | 18.21 | 19.65 | 0.192                              | 0.19  | 10.02 | 10.98 | 11.52 | 13.01 | 13.96 | 15.9     | 18.05 | 19.29 | 21.54 | 22.47 | 24.31 |
| 14            | -0.082                               | 0.156 | 9.61 | 10.28 | 10.66 | 11.7  | 12.37 | 13.74    | 15.27 | 16.16 | 17.8  | 18.49 | 19.85 | 0.211                              | 0.199 | 11.1  | 11.99 |       |       |       |          |       |       |       |       |       |

Supplementary Table 21. Smoothed percentiles for mBIA phase angle at 50kHz in supine position, for female and male 5 to 18 years.

| BIA supine Phase angle 50 kHz (°) |                                    |       |      |      |      |      |      |          |      |      |      |      |      |        |                                  |      |      |      |      |      |          |      |      |      |      |      |
|-----------------------------------|------------------------------------|-------|------|------|------|------|------|----------|------|------|------|------|------|--------|----------------------------------|------|------|------|------|------|----------|------|------|------|------|------|
| Age (years)                       | Female LMS parameters and centiles |       |      |      |      |      |      |          |      |      |      |      |      |        | Male LMS parameters and centiles |      |      |      |      |      |          |      |      |      |      |      |
|                                   | L                                  | S     | 1th  | 3th  | 5th  | 15th | 25th | 50th (M) | 75th | 85th | 95th | 97th | 99th | L      | S                                | 1th  | 3th  | 5th  | 15th | 25th | 50th (M) | 75th | 85th | 95th | 97th | 99th |
| 5                                 | -1.019                             | 0.072 | 4.14 | 4.25 | 4.32 | 4.49 | 4.6  | 4.83     | 5.07 | 5.22 | 5.48 | 5.59 | 5.8  | -0.99  | 0.095                            | 3.71 | 3.84 | 3.92 | 4.12 | 4.26 | 4.53     | 4.84 | 5.03 | 5.37 | 5.52 | 5.82 |
| 5.5                               | -1.155                             | 0.073 | 4.16 | 4.28 | 4.34 | 4.52 | 4.63 | 4.86     | 5.11 | 5.26 | 5.53 | 5.65 | 5.88 | -0.816 | 0.091                            | 3.86 | 4    | 4.08 | 4.29 | 4.42 | 4.7      | 5    | 5.18 | 5.51 | 5.65 | 5.93 |
| 6                                 | -1.278                             | 0.074 | 4.18 | 4.3  | 4.37 | 4.55 | 4.66 | 4.89     | 5.15 | 5.3  | 5.59 | 5.71 | 5.95 | -0.656 | 0.087                            | 4.01 | 4.15 | 4.23 | 4.44 | 4.58 | 4.85     | 5.15 | 5.33 | 5.64 | 5.77 | 6.04 |
| 6.5                               | -1.386                             | 0.075 | 4.2  | 4.32 | 4.39 | 4.57 | 4.68 | 4.92     | 5.18 | 5.34 | 5.63 | 5.76 | 6.01 | -0.509 | 0.085                            | 4.12 | 4.26 | 4.34 | 4.56 | 4.7  | 4.97     | 5.26 | 5.43 | 5.74 | 5.86 | 6.11 |
| 7                                 | -1.475                             | 0.076 | 4.22 | 4.34 | 4.4  | 4.59 | 4.7  | 4.94     | 5.21 | 5.37 | 5.68 | 5.81 | 6.07 | -0.373 | 0.082                            | 4.18 | 4.33 | 4.41 | 4.62 | 4.76 | 5.03     | 5.32 | 5.49 | 5.78 | 5.9  | 6.14 |
| 7.5                               | -1.545                             | 0.077 | 4.24 | 4.35 | 4.42 | 4.6  | 4.72 | 4.96     | 5.24 | 5.4  | 5.72 | 5.85 | 6.12 | -0.246 | 0.081                            | 4.22 | 4.36 | 4.44 | 4.66 | 4.8  | 5.06     | 5.35 | 5.51 | 5.8  | 5.91 | 6.14 |
| 8                                 | -1.596                             | 0.078 | 4.25 | 4.37 | 4.43 | 4.62 | 4.74 | 4.98     | 5.26 | 5.43 | 5.75 | 5.89 | 6.17 | -0.128 | 0.079                            | 4.26 | 4.41 | 4.49 | 4.71 | 4.85 | 5.12     | 5.4  | 5.56 | 5.84 | 5.95 | 6.17 |
| 8.5                               | -1.629                             | 0.079 | 4.26 | 4.38 | 4.45 | 4.63 | 4.75 | 5        | 5.29 | 5.46 | 5.79 | 5.93 | 6.22 | -0.016 | 0.079                            | 4.32 | 4.47 | 4.56 | 4.78 | 4.92 | 5.18     | 5.47 | 5.63 | 5.9  | 6.01 | 6.23 |
| 9                                 | -1.648                             | 0.08  | 4.28 | 4.4  | 4.47 | 4.65 | 4.78 | 5.03     | 5.32 | 5.49 | 5.83 | 5.97 | 6.27 | 0.089  | 0.078                            | 4.36 | 4.52 | 4.6  | 4.83 | 4.97 | 5.24     | 5.52 | 5.68 | 5.96 | 6.07 | 6.28 |
| 9.5                               | -1.654                             | 0.08  | 4.3  | 4.42 | 4.49 | 4.68 | 4.81 | 5.06     | 5.36 | 5.54 | 5.87 | 6.02 | 6.33 | 0.188  | 0.078                            | 4.37 | 4.54 | 4.62 | 4.85 | 4.99 | 5.27     | 5.55 | 5.71 | 5.98 | 6.09 | 6.3  |
| 10                                | -1.647                             | 0.081 | 4.33 | 4.45 | 4.52 | 4.72 | 4.84 | 5.1      | 5.4  | 5.59 | 5.93 | 6.08 | 6.39 | 0.282  | 0.079                            | 4.37 | 4.53 | 4.62 | 4.85 | 5    | 5.27     | 5.56 | 5.72 | 5.99 | 6.1  | 6.31 |
| 10.5                              | -1.627                             | 0.082 | 4.37 | 4.49 | 4.56 | 4.76 | 4.89 | 5.15     | 5.46 | 5.64 | 5.99 | 6.15 | 6.46 | 0.371  | 0.08                             | 4.36 | 4.53 | 4.62 | 4.86 | 5.01 | 5.29     | 5.57 | 5.73 | 6.01 | 6.12 | 6.32 |
| 11                                | -1.594                             | 0.082 | 4.41 | 4.53 | 4.61 | 4.81 | 4.94 | 5.21     | 5.52 | 5.71 | 6.06 | 6.22 | 6.54 | 0.457  | 0.081                            | 4.36 | 4.54 | 4.63 | 4.88 | 5.03 | 5.32     | 5.61 | 5.77 | 6.05 | 6.16 | 6.37 |
| 11.5                              | -1.548                             | 0.083 | 4.45 | 4.58 | 4.66 | 4.86 | 4.99 | 5.27     | 5.59 | 5.78 | 6.14 | 6.3  | 6.62 | 0.538  | 0.083                            | 4.38 | 4.56 | 4.66 | 4.92 | 5.07 | 5.37     | 5.67 | 5.84 | 6.12 | 6.23 | 6.45 |
| 12                                | -1.491                             | 0.083 | 4.5  | 4.63 | 4.71 | 4.92 | 5.06 | 5.34     | 5.66 | 5.85 | 6.22 | 6.38 | 6.71 | 0.617  | 0.084                            | 4.42 | 4.61 | 4.71 | 4.98 | 5.14 | 5.44     | 5.76 | 5.93 | 6.22 | 6.33 | 6.55 |
| 12.5                              | -1.423                             | 0.084 | 4.55 | 4.69 | 4.77 | 4.98 | 5.12 | 5.41     | 5.74 | 5.94 | 6.31 | 6.47 | 6.8  | 0.692  | 0.086                            | 4.47 | 4.67 | 4.78 | 5.06 | 5.23 | 5.54     | 5.87 | 6.05 | 6.35 | 6.46 | 6.69 |
| 13                                | -1.348                             | 0.085 | 4.6  | 4.74 | 4.82 | 5.04 | 5.19 | 5.48     | 5.82 | 6.02 | 6.39 | 6.55 | 6.89 | 0.763  | 0.088                            | 4.54 | 4.76 | 4.87 | 5.16 | 5.34 | 5.67     | 6.01 | 6.19 | 6.5  | 6.62 | 6.85 |
| 13.5                              | -1.267                             | 0.085 | 4.65 | 4.8  | 4.88 | 5.11 | 5.25 | 5.55     | 5.89 | 6.1  | 6.48 | 6.64 | 6.97 | 0.833  | 0.089                            | 4.64 | 4.86 | 4.98 | 5.29 | 5.47 | 5.82     | 6.17 | 6.36 | 6.68 | 6.81 | 7.05 |
| 14                                | -1.183                             | 0.086 | 4.7  | 4.85 | 4.93 | 5.16 | 5.31 | 5.62     | 5.97 | 6.17 | 6.56 | 6.72 | 7.05 | 0.9    | 0.09                             | 4.74 | 4.98 | 5.1  | 5.42 | 5.62 | 5.98     | 6.34 | 6.54 | 6.87 | 7    | 7.25 |
| 14.5                              | -1.096                             | 0.086 | 4.74 | 4.9  | 4.98 | 5.22 | 5.37 | 5.68     | 6.03 | 6.24 | 6.63 | 6.79 | 7.13 | 0.964  | 0.091                            | 4.84 | 5.09 | 5.22 | 5.56 | 5.76 | 6.13     | 6.51 | 6.71 | 7.05 | 7.19 | 7.44 |
| 15                                | -1.01                              | 0.087 | 4.78 | 4.94 | 5.03 | 5.27 | 5.43 | 5.74     | 6.1  | 6.31 | 6.7  | 6.86 | 7.19 | 1.026  | 0.092                            | 4.93 | 5.19 | 5.32 | 5.68 | 5.88 | 6.27     | 6.66 | 6.87 | 7.21 | 7.35 | 7.6  |
| 15.5                              | -0.925                             | 0.087 | 4.81 | 4.98 | 5.07 | 5.31 | 5.47 | 5.8      | 6.16 | 6.37 | 6.76 | 6.92 | 7.25 | 1.086  | 0.092                            | 5.01 | 5.28 | 5.42 | 5.78 | 5.99 | 6.39     | 6.79 | 7    | 7.35 | 7.49 | 7.75 |
| 16                                | -0.842                             | 0.088 | 4.84 | 5.01 | 5.1  | 5.35 | 5.52 | 5.84     | 6.21 | 6.42 | 6.81 | 6.98 | 7.31 | 1.145  | 0.092                            | 5.08 | 5.35 | 5.5  | 5.87 | 6.09 | 6.49     | 6.9  | 7.11 | 7.47 | 7.61 | 7.87 |
| 16.5                              | -0.763                             | 0.088 | 4.86 | 5.03 | 5.13 | 5.39 | 5.55 | 5.88     | 6.25 | 6.47 | 6.86 | 7.02 | 7.35 | 1.201  | 0.092                            | 5.13 | 5.42 | 5.57 | 5.95 | 6.17 | 6.58     | 6.99 | 7.21 | 7.57 | 7.71 | 7.97 |
| 17                                | -0.688                             | 0.088 | 4.88 | 5.05 | 5.15 | 5.41 | 5.58 | 5.92     | 6.29 | 6.51 | 6.9  | 7.06 | 7.39 | 1.256  | 0.092                            | 5.19 | 5.48 | 5.63 | 6.02 | 6.24 | 6.66     | 7.08 | 7.3  | 7.66 | 7.8  | 8.06 |
| 17.5                              | -0.617                             | 0.089 | 4.89 | 5.07 | 5.17 | 5.44 | 5.61 | 5.95     | 6.32 | 6.54 | 6.93 | 7.09 | 7.42 | 1.309  | 0.093                            | 5.23 | 5.53 | 5.68 | 6.08 | 6.31 | 6.73     | 7.15 | 7.37 | 7.74 | 7.88 | 8.14 |
| 18                                | -0.549                             | 0.089 | 4.9  | 5.08 | 5.18 | 5.45 | 5.63 | 5.97     | 6.35 | 6.56 | 6.96 | 7.12 | 7.44 | 1.361  | 0.093                            | 5.27 | 5.57 | 5.73 | 6.13 | 6.37 | 6.8      | 7.22 | 7.44 | 7.8  | 7.95 | 8.21 |

Supplementary Table 22. Smoothed percentiles for mBIA phase angle in standing position, for female and male 5 to 18 years.

| BIA standing Phase angle 50 kHz (°) |                                    |       |      |      |      |      |      |          |      |      |      |      |      |        |                                  |      |      |      |      |        |          |      |      |      |      |      |
|-------------------------------------|------------------------------------|-------|------|------|------|------|------|----------|------|------|------|------|------|--------|----------------------------------|------|------|------|------|--------|----------|------|------|------|------|------|
| Age (years)                         | Female LMS parameters and centiles |       |      |      |      |      |      |          |      |      |      |      |      |        | Male LMS parameters and centiles |      |      |      |      |        |          |      |      |      |      |      |
|                                     | L                                  | S     | 1th  | 3th  | 5th  | 15th | 25th | 50th (M) | 75th | 85th | 95th | 97th | 99th | L      | S                                | 1th  | 3th  | 5th  | 15th | 25th   | 50th (M) | 75th | 85th | 95th | 97th | 99th |
| 5                                   | -0.599                             | 0.077 | 3.61 | 3.73 | 3.79 | 3.96 | 4.07 | 4.28     | 4.51 | 4.64 | 4.88 | 4.98 | 5.17 | -0.917 | 0.111                            | 3.17 | 3.3  | 3.37 | 3.58 | 3.71   | 3.99     | 4.31 | 4.51 | 4.88 | 5.03 | 5.36 |
| 5.5                                 | -0.721                             | 0.078 | 3.63 | 3.74 | 3.81 | 3.98 | 4.09 | 4.3      | 4.54 | 4.67 | 4.92 | 5.02 | 5.22 | -0.757 | 0.102                            | 3.35 | 3.48 | 3.55 | 3.76 | 3.89   | 4.16     | 4.47 | 4.65 | 4.99 | 5.13 | 5.42 |
| 6                                   | -0.834                             | 0.079 | 3.64 | 3.76 | 3.82 | 3.99 | 4.1  | 4.32     | 4.56 | 4.7  | 4.96 | 5.06 | 5.27 | -0.61  | 0.095                            | 3.51 | 3.65 | 3.72 | 3.93 | 4.06   | 4.32     | 4.61 | 4.79 | 5.1  | 5.23 | 5.48 |
| 6.5                                 | -0.939                             | 0.08  | 3.66 | 3.77 | 3.83 | 4.01 | 4.12 | 4.34     | 4.59 | 4.73 | 4.99 | 5.1  | 5.32 | -0.475 | 0.09                             | 3.63 | 3.77 | 3.84 | 4.05 | 4.18   | 4.44     | 4.72 | 4.88 | 5.17 | 5.29 | 5.53 |
| 7                                   | -1.036                             | 0.081 | 3.67 | 3.78 | 3.85 | 4.02 | 4.13 | 4.36     | 4.61 | 4.76 | 5.03 | 5.14 | 5.37 | -0.351 | 0.087                            | 3.7  | 3.84 | 3.91 | 4.12 | 4.24   | 4.5      | 4.77 | 4.93 | 5.21 | 5.32 | 5.54 |
| 7.5                                 | -1.122                             | 0.082 | 3.68 | 3.79 | 3.86 | 4.03 | 4.14 | 4.37     | 4.63 | 4.78 | 5.06 | 5.17 | 5.41 | -0.234 | 0.085                            | 3.73 | 3.87 | 3.94 | 4.15 | 4.28   | 4.53     | 4.79 | 4.95 | 5.21 | 5.32 | 5.54 |
| 8                                   | -1.196                             | 0.083 | 3.69 | 3.8  | 3.87 | 4.04 | 4.15 | 4.38     | 4.64 | 4.8  | 5.08 | 5.21 | 5.45 | -0.126 | 0.084                            | 3.76 | 3.9  | 3.97 | 4.18 | 4.3    | 4.55     | 4.82 | 4.97 | 5.23 | 5.34 | 5.54 |
| 8.5                                 | -1.259                             | 0.083 | 3.7  | 3.81 | 3.88 | 4.05 | 4.17 | 4.4      | 4.66 | 4.82 | 5.11 | 5.24 | 5.49 | -0.024 | 0.083                            | 3.78 | 3.92 | 4    | 4.21 | 4.34   | 4.58     | 4.85 | 5    | 5.26 | 5.36 | 5.56 |
| 9                                   | -1.311                             | 0.084 | 3.71 | 3.82 | 3.89 | 4.07 | 4.18 | 4.42     | 4.68 | 4.84 | 5.14 | 5.27 | 5.54 | 0.073  | 0.083                            | 3.8  | 3.94 | 4.02 | 4.23 | 4.36   | 4.61     | 4.87 | 5.02 | 5.27 | 5.38 | 5.58 |
| 9.5                                 | -1.353                             | 0.085 | 3.72 | 3.84 | 3.9  | 4.08 | 4.2  | 4.44     | 4.71 | 4.87 | 5.18 | 5.31 | 5.58 | 0.164  | 0.083                            | 3.79 | 3.94 | 4.02 | 4.23 | 4.36   | 4.61     | 4.88 | 5.02 | 5.28 | 5.38 | 5.57 |
| 10                                  | -1.385                             | 0.086 | 3.74 | 3.86 | 3.92 | 4.1  | 4.22 | 4.46     | 4.74 | 4.9  | 5.21 | 5.35 | 5.63 | 0.25   | 0.083                            | 3.78 | 3.93 | 4.01 | 4.22 | 4.35   | 4.61     | 4.87 | 5.02 | 5.27 | 5.37 | 5.57 |
| 10.5                                | -1.405                             | 0.086 | 3.76 | 3.88 | 3.94 | 4.12 | 4.24 | 4.49     | 4.77 | 4.94 | 5.25 | 5.39 | 5.68 | 0.333  | 0.084                            | 3.76 | 3.92 | 4    | 4.22 | 4.35   | 4.61     | 4.88 | 5.02 | 5.28 | 5.38 | 5.57 |
| 11                                  | -1.415                             | 0.087 | 3.78 | 3.9  | 3.97 | 4.15 | 4.27 | 4.52     | 4.8  | 4.97 | 5.3  | 5.44 | 5.73 | 0.411  | 0.086                            | 3.75 | 3.91 | 4    | 4.22 | 4.36   | 4.62     | 4.9  | 5.05 | 5.3  | 5.41 | 5.6  |
| 11.5                                | -1.413                             | 0.087 | 3.8  | 3.92 | 3.99 | 4.18 | 4.3  | 4.55     | 4.84 | 5.01 | 5.34 | 5.49 | 5.78 | 0.486  | 0.088                            | 3.76 | 3.92 | 4.01 | 4.24 | 4.39   | 4.66     | 4.94 | 5.09 | 5.36 | 5.46 | 5.66 |
| 12                                  | -1.401                             | 0.088 | 3.83 | 3.95 | 4.02 | 4.21 | 4.33 | 4.58     | 4.88 | 5.05 | 5.39 | 5.53 | 5.84 | 0.557  | 0.09                             | 3.77 | 3.94 | 4.04 | 4.28 | 4.43   | 4.71     | 5    | 5.16 | 5.43 | 5.54 | 5.74 |
| 12.5                                | -1.38                              | 0.089 | 3.85 | 3.98 | 4.05 | 4.24 | 4.36 | 4.62     | 4.92 | 5.1  | 5.44 | 5.58 | 5.89 | 0.626  | 0.092                            | 3.8  | 3.98 | 4.08 | 4.34 | 4.49   | 4.79     | 5.09 | 5.25 | 5.54 | 5.65 | 5.86 |
| 13                                  | -1.353                             | 0.089 | 3.88 | 4    | 4.07 | 4.27 | 4.4  | 4.66     | 4.96 | 5.14 | 5.48 | 5.63 | 5.94 | 0.692  | 0.094                            | 3.85 | 4.04 | 4.14 | 4.41 | 4.58   | 4.88     | 5.2  | 5.37 | 5.66 | 5.77 | 5.99 |
| 13.5                                | -1.321                             | 0.09  | 3.9  | 4.03 | 4.1  | 4.3  | 4.43 | 4.69     | 5    | 5.18 | 5.53 | 5.68 | 5.99 | 0.756  | 0.096                            | 3.91 | 4.12 | 4.22 | 4.51 | 4.68   | 5        | 5.32 | 5.5  | 5.8  | 5.92 | 6.14 |
| 14                                  | -1.286                             | 0.09  | 3.93 | 4.06 | 4.13 | 4.33 | 4.46 | 4.73     | 5.04 | 5.23 | 5.58 | 5.73 | 6.04 | 0.817  | 0.097                            | 3.99 | 4.2  | 4.31 | 4.61 | 4.78   | 5.12     | 5.45 | 5.63 | 5.94 | 6.06 | 6.29 |
| 14.5                                | -1.248                             | 0.091 | 3.95 | 4.08 | 4.16 | 4.36 | 4.49 | 4.77     | 5.08 | 5.27 | 5.62 | 5.78 | 6.09 | 0.876  | 0.097                            | 4.07 | 4.29 | 4.4  | 4.71 | 4.89</ |          |      |      |      |      |      |



Supplementary Table 23. Smoothed percentiles for mBIA resistance at 50kHz in supine position, for female and male 5 to 18 years.

| Age (years) | BIA supine Resistance 50 kHz ( $\Omega$ ) |       |       |       |       |       |       |          |       |       |       |                                  |        |        |       |       |       |       |       |       |          |       |       |       |       |       |
|-------------|-------------------------------------------|-------|-------|-------|-------|-------|-------|----------|-------|-------|-------|----------------------------------|--------|--------|-------|-------|-------|-------|-------|-------|----------|-------|-------|-------|-------|-------|
|             | Female LMS parameters and centiles        |       |       |       |       |       |       |          |       |       |       | Male LMS parameters and centiles |        |        |       |       |       |       |       |       |          |       |       |       |       |       |
|             | L                                         | S     | 1th   | 3th   | 5th   | 15th  | 25th  | 50th (M) | 75th  | 85th  | 95th  | 97th                             | 99th   | L      | S     | 1th   | 3th   | 5th   | 15th  | 25th  | 50th (M) | 75th  | 85th  | 95th  | 97th  | 99th  |
| 5           | -0.793                                    | 0.074 | 712.9 | 734.3 | 746   | 778   | 798.2 | 838.5    | 882.6 | 908   | 953.8 | 972.7                            | 1010.2 | 0.673  | 0.084 | 655.5 | 683.8 | 699   | 738.5 | 762.4 | 807.5    | 853.4 | 878.4 | 921   | 937.7 | 969.4 |
| 5.5         | -0.535                                    | 0.08  | 692.9 | 715.8 | 728.5 | 762.7 | 784.2 | 826.9    | 873.3 | 899.8 | 947.3 | 966.8                            | 1005.3 | 0.588  | 0.086 | 649.7 | 678   | 693.2 | 733   | 757.2 | 803      | 849.9 | 875.5 | 919.3 | 936.5 | 969.4 |
| 6           | -0.328                                    | 0.085 | 680.3 | 705   | 718.6 | 755.3 | 778.3 | 823.8    | 872.8 | 900.7 | 950.3 | 970.6                            | 1010.4 | 0.51   | 0.088 | 644   | 672.4 | 687.6 | 727.7 | 752   | 798.5    | 846.3 | 872.5 | 917.5 | 935.2 | 969.1 |
| 6.5         | -0.158                                    | 0.09  | 673.1 | 699.9 | 714.5 | 754   | 778.7 | 827.2    | 879.3 | 908.8 | 961   | 982.2                            | 1023.7 | 0.439  | 0.089 | 639.3 | 667.6 | 682.9 | 723.2 | 747.8 | 794.9    | 843.5 | 870.3 | 916.4 | 934.7 | 969.7 |
| 7           | -0.017                                    | 0.095 | 664.8 | 693.6 | 709.3 | 751.6 | 777.9 | 829.5    | 884.6 | 915.7 | 970.5 | 992.7                            | 1035.9 | 0.372  | 0.091 | 636.9 | 665.3 | 680.6 | 721.3 | 746.1 | 793.9    | 843.5 | 871   | 918.3 | 937.1 | 973.2 |
| 7.5         | 0.102                                     | 0.1   | 654.6 | 685.3 | 702   | 746.8 | 774.7 | 829.2    | 887   | 919.6 | 976.7 | 999.6                            | 1044.4 | 0.31   | 0.093 | 635.9 | 664.4 | 679.8 | 720.8 | 746   | 794.6    | 845.2 | 873.3 | 922   | 941.3 | 978.6 |
| 8           | 0.203                                     | 0.105 | 643.7 | 676   | 693.6 | 740.6 | 769.8 | 826.7    | 886.9 | 920.6 | 979.5 | 1003.1                           | 1049   | 0.253  | 0.094 | 633.4 | 662   | 677.5 | 718.7 | 744.1 | 793.3    | 844.8 | 873.5 | 923.3 | 943.1 | 981.5 |
| 8.5         | 0.289                                     | 0.109 | 632.8 | 666.5 | 684.8 | 733.7 | 763.9 | 822.6    | 884.4 | 918.9 | 979   | 1003                             | 1049.6 | 0.198  | 0.095 | 628.6 | 657   | 672.5 | 713.8 | 739.3 | 788.9    | 841   | 870.1 | 920.8 | 941.1 | 980.4 |
| 9           | 0.364                                     | 0.111 | 622.4 | 657.1 | 675.9 | 726.1 | 757.1 | 816.9    | 879.7 | 914.7 | 975.3 | 999.5                            | 1046.3 | 0.147  | 0.097 | 622.4 | 650.8 | 666.2 | 707.4 | 733   | 782.7    | 835.3 | 864.7 | 916.2 | 936.9 | 977   |
| 9.5         | 0.429                                     | 0.113 | 612.8 | 648.2 | 667.4 | 718.4 | 749.8 | 810.3    | 873.5 | 908.6 | 969.3 | 993.4                            | 1039.9 | 0.099  | 0.098 | 615.7 | 643.9 | 659.2 | 700.3 | 725.9 | 775.7    | 828.7 | 858.4 | 910.5 | 931.5 | 972.3 |
| 10          | 0.487                                     | 0.114 | 604.2 | 640   | 659.5 | 711   | 742.5 | 803.3    | 866.4 | 901.4 | 961.7 | 985.6                            | 1031.6 | 0.053  | 0.099 | 608.1 | 636   | 651.2 | 692.1 | 717.6 | 767.5    | 820.6 | 850.6 | 903.2 | 924.5 | 965.9 |
| 10.5        | 0.537                                     | 0.115 | 596.7 | 632.8 | 652.4 | 704   | 735.6 | 796.2    | 859   | 893.6 | 953.2 | 976.8                            | 1022   | 0.009  | 0.101 | 599.2 | 626.8 | 641.8 | 682.4 | 707.8 | 757.5    | 810.7 | 840.8 | 893.8 | 915.3 | 957.2 |
| 11          | 0.583                                     | 0.115 | 590.3 | 626.6 | 646.1 | 697.7 | 729.2 | 789.3    | 851.5 | 885.7 | 944.3 | 967.5                            | 1011.9 | -0.033 | 0.102 | 588.8 | 615.9 | 630.8 | 671   | 696.1 | 745.5    | 798.6 | 828.7 | 881.9 | 905.3 | 945.7 |
| 11.5        | 0.623                                     | 0.115 | 585   | 621.2 | 640.7 | 692.1 | 723.3 | 782.9    | 844.3 | 877.9 | 935.6 | 958.3                            | 1001.8 | -0.073 | 0.103 | 576.9 | 603.6 | 618.3 | 657.8 | 682.6 | 731.6    | 784.4 | 814.4 | 867.6 | 889.2 | 931.6 |
| 12          | 0.659                                     | 0.114 | 580.6 | 616.6 | 636.1 | 687   | 718   | 776.9    | 837.4 | 870.5 | 927.1 | 949.4                            | 991.9  | -0.111 | 0.104 | 563.9 | 590   | 604.4 | 643.3 | 667.7 | 716.1    | 768.4 | 798.2 | 851.2 | 872.8 | 915.3 |
| 12.5        | 0.692                                     | 0.113 | 576.8 | 612.7 | 632   | 682.6 | 713.2 | 771.5    | 831.1 | 863.6 | 919.2 | 941                              | 982.7  | -0.147 | 0.105 | 550.1 | 575.6 | 589.7 | 627.8 | 651.8 | 699.5    | 751.2 | 780.7 | 833.4 | 854.9 | 897.4 |
| 13          | 0.721                                     | 0.112 | 573.6 | 609.3 | 628.5 | 678.7 | 709   | 766.5    | 825.3 | 857.3 | 911.9 | 933.3                            | 974.1  | -0.182 | 0.106 | 535.9 | 560.9 | 574.6 | 612   | 635.5 | 682.4    | 733.4 | 762.6 | 814.9 | 836.4 | 878.6 |
| 13.5        | 0.748                                     | 0.112 | 570.8 | 606.4 | 625.4 | 675.1 | 705.2 | 762      | 820   | 851.5 | 905.2 | 926.2                            | 966.2  | -0.216 | 0.107 | 522.2 | 546.5 | 559.9 | 596.5 | 619.6 | 665.7    | 716   | 745   | 796.8 | 818.1 | 860.2 |
| 14          | 0.773                                     | 0.111 | 568.4 | 603.7 | 622.6 | 672   | 701.8 | 758      | 815.2 | 846.2 | 899.1 | 919.7                            | 959.1  | -0.249 | 0.108 | 509.4 | 533.2 | 546.3 | 582.2 | 604.9 | 650.3    | 699.9 | 728.6 | 780   | 801.2 | 843.2 |
| 14.5        | 0.795                                     | 0.11  | 566.2 | 601.4 | 620.2 | 669.1 | 698.6 | 754.3    | 810.8 | 841.5 | 893.5 | 913.9                            | 952.6  | -0.28  | 0.109 | 498.2 | 521.5 | 534.4 | 569.6 | 592   | 636.7    | 685.9 | 714.2 | 765.4 | 786.6 | 828.5 |
| 15          | 0.816                                     | 0.11  | 564.3 | 599.2 | 617.9 | 666.6 | 695.8 | 750.9    | 806.8 | 837.1 | 888.5 | 908.5                            | 946.7  | -0.31  | 0.11  | 488.8 | 511.7 | 524.4 | 559.1 | 581.1 | 625.4    | 674.1 | 702.4 | 753.4 | 774.6 | 816.6 |
| 15.5        | 0.835                                     | 0.109 | 562.5 | 597.3 | 615.9 | 664.2 | 693.2 | 747.9    | 803.2 | 833.1 | 883.9 | 903.7                            | 941.3  | -0.34  | 0.111 | 481.2 | 503.7 | 516.2 | 550.5 | 572.3 | 616.2    | 664.8 | 692.9 | 744   | 765.2 | 807.4 |
| 16          | 0.852                                     | 0.108 | 560.8 | 595.5 | 614   | 662   | 690.9 | 745.1    | 799.9 | 829.5 | 879.7 | 899.2                            | 936.4  | -0.368 | 0.112 | 475.1 | 497.3 | 509.7 | 543.7 | 565.4 | 609      | 657.5 | 685.6 | 736.8 | 758.1 | 800.6 |
| 16.5        | 0.868                                     | 0.108 | 559.4 | 593.9 | 612.3 | 660.1 | 688.7 | 742.5    | 796.8 | 826.2 | 875.8 | 895.2                            | 931.9  | -0.396 | 0.113 | 470.1 | 492.2 | 504.5 | 538.2 | 559.8 | 603.3    | 651.7 | 679.9 | 731.4 | 752.8 | 795.7 |
| 17          | 0.883                                     | 0.107 | 558   | 592.4 | 610.7 | 658.3 | 686.8 | 740.2    | 794.1 | 823.1 | 872.3 | 891.5                            | 927.8  | -0.423 | 0.114 | 466   | 487.9 | 500.1 | 533.6 | 555.1 | 598.6    | 647   | 675.4 | 727.1 | 748.7 | 792.1 |
| 17.5        | 0.897                                     | 0.107 | 556.8 | 591.1 | 609.3 | 656.6 | 684.9 | 738      | 791.5 | 820.3 | 869.1 | 888.1                            | 924    | -0.449 | 0.114 | 462.4 | 484.2 | 496.3 | 529.7 | 551.1 | 594.6    | 643.1 | 671.6 | 723.7 | 745.5 | 789.3 |
| 18          | 0.91                                      | 0.107 | 555.6 | 589.8 | 608   | 655.1 | 683.3 | 736      | 789.1 | 817.8 | 866.1 | 884.9                            | 920.5  | -0.474 | 0.115 | 459.2 | 480.8 | 492.9 | 526.2 | 547.6 | 591      | 639.6 | 668.2 | 720.7 | 742.7 | 787.1 |

Supplementary Table 24. Smoothed percentiles for mBIA resistance / height in supine position, for female and male 5 to 18 years.

| Age (years) | BIA supine Resistance ( $\Omega$ ) / height (cm) |       |       |       |       |       |       |          |       |       |       |        |                                  |        |       |       |       |       |       |       |          |       |       |       |       |       |
|-------------|--------------------------------------------------|-------|-------|-------|-------|-------|-------|----------|-------|-------|-------|--------|----------------------------------|--------|-------|-------|-------|-------|-------|-------|----------|-------|-------|-------|-------|-------|
|             | Female LMS parameters and centiles               |       |       |       |       |       |       |          |       |       |       |        | Male LMS parameters and centiles |        |       |       |       |       |       |       |          |       |       |       |       |       |
|             | L                                                | S     | 1th   | 3th   | 5th   | 15th  | 25th  | 50th (M) | 75th  | 85th  | 95th  | 97th   | 99th                             | L      | S     | 1th   | 3th   | 5th   | 15th  | 25th  | 50th (M) | 75th  | 85th  | 95th  | 97th  | 99th  |
| 5           | 0.605                                            | 0.106 | 6.443 | 6.804 | 6.998 | 7.509 | 7.819 | 8.411    | 9.02  | 9.354 | 9.925 | 10.151 | 10.581                           | 0.408  | 0.1   | 5.864 | 6.158 | 6.316 | 6.737 | 6.995 | 7.49     | 8.006 | 8.291 | 8.784 | 8.98  | 9.357 |
| 5.5         | 0.576                                            | 0.105 | 6.248 | 6.592 | 6.778 | 7.266 | 7.564 | 8.131    | 8.717 | 9.038 | 9.588 | 9.805  | 10.221                           | 0.334  | 0.101 | 5.669 | 5.95  | 6.103 | 6.508 | 6.757 | 7.239    | 7.743 | 8.023 | 8.508 | 8.702 | 9.075 |
| 6           | 0.549                                            | 0.106 | 6.07  | 6.404 | 6.585 | 7.06  | 7.35  | 7.904    | 8.477 | 8.791 | 9.331 | 9.545  | 9.954                            | 0.266  | 0.102 | 5.469 | 5.739 | 5.885 | 6.277 | 6.518 | 6.987    | 7.479 | 7.754 | 8.232 | 8.423 | 8.793 |
| 6.5         | 0.525                                            | 0.108 | 5.883 | 6.214 | 6.393 | 6.866 | 7.155 | 7.709    | 8.282 | 8.597 | 9.14  | 9.355  | 9.767                            | 0.204  | 0.103 | 5.286 | 5.547 | 5.689 | 6.068 | 6.304 | 6.761    | 7.245 | 7.516 | 7.989 | 8.179 | 8.547 |
| 7           | 0.502                                            | 0.113 | 5.668 | 6     | 6.181 | 6.657 | 6.949 | 7.51     | 8.093 | 8.414 | 8.968 | 9.188  | 9.61                             | 0.146  | 0.105 | 5.144 | 5.398 | 5.537 | 5.909 | 6.141 | 6.593    | 7.073 | 7.343 | 7.816 | 8.006 | 8.376 |
| 7.5         | 0.481                                            | 0.119 | 5.427 | 5.764 | 5.946 | 6.43  | 6.728 | 7.3      | 7.897 | 8.228 | 8.799 | 9.026  | 9.463                            | 0.092  | 0.107 | 5.022 | 5.272 | 5.409 | 5.778 | 6.007 | 6.458    | 6.939 | 7.211 | 7.689 | 7.881 | 8.258 |
| 8           | 0.461                                            | 0.126 | 5.178 | 5.519 | 5.704 | 6.197 | 6.501 | 7.088    | 7.702 | 8.043 | 8.635 | 8.87   | 9.324                            | 0.042  | 0.11  | 4.88  | 5.127 | 5.262 | 5.627 | 5.855 | 6.305    | 6.788 | 7.061 | 7.545 | 7.741 | 8.124 |
| 8.5         | 0.443                                            | 0.133 | 4.933 | 5.278 | 5.465 | 5.966 | 6.276 | 6.877    | 7.508 | 7.859 | 8.471 | 8.714  | 9.186                            | -0.005 | 0.113 | 4.716 | 4.958 | 5.092 | 5.452 | 5.679 | 6.126    | 6.609 | 6.884 | 7.372 | 7.571 | 7.96  |
| 9           | 0.425                                            | 0.139 | 4.703 | 5.049 | 5.237 | 5.743 | 6.057 | 6.667    | 7.311 | 7.67  | 8.298 | 8.549  | 9.034                            | -0.05  | 0.116 | 4.552 | 4.79  | 4.921 | 5.277 | 5.501 | 5.946    | 6.429 | 6.705 | 7.198 | 7.399 | 7.795 |
| 9.5         | 0.408                                            | 0.145 | 4.495 | 4.839 | 5.028 | 5.533 | 5.847 | 6.46     | 7.11  | 7.474 | 8.11  | 8.364  | 8.859                            | -0.092 | 0.119 | 4.397 | 4.63  | 4.759 | 5.11  | 5.332 | 5.774    | 6.257 | 6.534 | 7.031 | 7.234 | 7.636 |
| 10          | 0.393                                            | 0.148 | 4.32  | 4.658 | 4.844 | 5.342 | 5.653 | 6.26     | 6.906 | 7.268 | 7.903 | 8.158  | 8.653                            | -0.132 | 0.122 | 4.241 | 4.469 | 4.595 | 4.941 | 5.16  | 5.599    | 6.081 | 6.358 | 6.858 | 7.064 | 7.472 |
| 10.5        | 0.378                                            | 0.149 | 4.182 | 4.51  | 4.69  | 5.175 | 5.478 | 6.071    | 6.702 | 7.057 | 7.68  | 7.93   | 8.417                            | -0.17  | 0.125 | 4.08  | 4.303 | 4.427 | 4.766 | 4.982 | 5.416    | 5.894 | 6.172 | 6.673 | 6.88  | 7.292 |
| 11          | 0.364                                            | 0.148 | 4.082 | 4.397 | 4.569 | 5.035 | 5.325 | 5.894    | 6.501 | 6.842 | 7.441 | 7.682  | 8.15                             | -0.206 | 0.127 | 3.915 | 4.131 | 4.251 | 4.582 | 4.794 | 5.22     | 5.694 | 5.969 | 6.469 | 6.676 | 7.09  |
| 11.5        | 0.35                                             | 0.144 | 4.017 | 4.316 | 4.479 | 4.92  | 5.195 | 5.733    | 6.307 | 6.629 | 7.196 | 7.423  | 7.866                            | -0.241 | 0.13  | 3.746 | 3.955 | 4.071 | 4.392 | 4.598 | 5.014    | 5.478 | 5.75  | 6.244 | 6.45  | 6.862 |
| 12          | 0.337                                            | 0.138 | 3.981 | 4.262 | 4.415 | 4.829 | 5.087 | 5.591    | 6.128 | 6.429 | 6.958 | 7.171  | 7.584                            | -0.274 | 0.132 | 3.579 | 3.779 | 3.891 | 4.2   | 4.398 | 4.801    | 5.253 | 5.517 | 6.001 | 6.204 | 6.61  |
| 12.5        | 0.324                                            | 0.132 | 3.963 | 4.227 | 4.371 | 4.759 | 5     | 5.471    | 5.971 | 6.252 | 6.744 | 6.942  | 7.326                            | -0.306 | 0.132 | 3.417 | 3.608 | 3.714 | 4.009 | 4.2   | 4.586    | 5.021 | 5.277 | 5.746 | 5.942 | 6.338 |
| 13          | 0.312                                            | 0     |       |       |       |       |       |          |       |       |       |        |                                  |        |       |       |       |       |       |       |          |       |       |       |       |       |



Supplementary Table 25. Smoothed percentiles for mBIA resistance at 50kHz in standing position, for female and male 5 to 18 years.

| BIA standing Resistance 50 kHz (Ω) |                                    |       |       |       |       |       |       |          |       |       |        |        |                                  |        |       |       |       |       |       |       |          |       |       |       |        |        |
|------------------------------------|------------------------------------|-------|-------|-------|-------|-------|-------|----------|-------|-------|--------|--------|----------------------------------|--------|-------|-------|-------|-------|-------|-------|----------|-------|-------|-------|--------|--------|
| Age (years)                        | Female LMS parameters and centiles |       |       |       |       |       |       |          |       |       |        |        | Male LMS parameters and centiles |        |       |       |       |       |       |       |          |       |       |       |        |        |
|                                    | L                                  | S     | 1th   | 3th   | 5th   | 15th  | 25th  | 50th (M) | 75th  | 85th  | 95th   | 97th   | 99th                             | L      | S     | 1th   | 3th   | 5th   | 15th  | 25th  | 50th (M) | 75th  | 85th  | 95th  | 97th   | 99th   |
| 5                                  | -0.862                             | 0.078 | 764.4 | 787.9 | 800.9 | 836.4 | 858.9 | 904      | 953.8 | 982.6 | 1034.9 | 1056.6 | 1100                             | -0.294 | 0.086 | 711   | 737.3 | 751.8 | 790.8 | 815.2 | 863.4    | 915.4 | 944.9 | 997.4 | 1018.8 | 1060.9 |
| 5.5                                | -0.715                             | 0.082 | 749.8 | 774.5 | 788.1 | 825.3 | 848.8 | 895.9    | 947.7 | 977.6 | 1031.7 | 1054.1 | 1098.8                           | -0.268 | 0.088 | 702.3 | 728.9 | 743.5 | 783   | 807.8 | 856.6    | 909.2 | 939.2 | 992.4 | 1014.1 | 1056.6 |
| 6                                  | -0.58                              | 0.086 | 735.9 | 761.7 | 776   | 814.9 | 839.5 | 888.6    | 942.4 | 973.4 | 1029.3 | 1052.3 | 1098.2                           | -0.244 | 0.089 | 693.8 | 720.7 | 735.5 | 775.5 | 800.5 | 849.9    | 903.1 | 933.4 | 987.2 | 1009.1 | 1052.1 |
| 6.5                                | -0.457                             | 0.09  | 722.2 | 749.3 | 764.3 | 804.9 | 830.6 | 881.9    | 937.8 | 970   | 1027.8 | 1051.6 | 1098.7                           | -0.222 | 0.091 | 686.4 | 713.7 | 728.6 | 769   | 794.3 | 844.2    | 898   | 928.6 | 983   | 1005.2 | 1048.7 |
| 7                                  | -0.343                             | 0.095 | 708.3 | 736.8 | 752.5 | 795.2 | 822.1 | 875.7    | 934   | 967.5 | 1027.5 | 1052.1 | 1100.7                           | -0.201 | 0.093 | 681.1 | 708.7 | 723.8 | 764.7 | 790.3 | 840.8    | 895.3 | 926.3 | 981.4 | 1003.8 | 1047.8 |
| 7.5                                | -0.236                             | 0.1   | 694.3 | 724.3 | 740.8 | 785.6 | 813.9 | 869.9    | 930.9 | 965.8 | 1028.1 | 1053.6 | 1104                             | -0.182 | 0.094 | 677.3 | 705.2 | 720.6 | 762   | 788   | 839.2    | 894.4 | 925.8 | 981.6 | 1004.3 | 1048.8 |
| 8                                  | -0.137                             | 0.105 | 680.4 | 711.9 | 729.3 | 776.3 | 805.9 | 864.6    | 928.2 | 964.5 | 1029.2 | 1055.6 | 1107.6                           | -0.165 | 0.095 | 672.9 | 701.2 | 716.7 | 758.6 | 784.8 | 836.6    | 892.5 | 924.2 | 980.6 | 1003.5 | 1048.6 |
| 8.5                                | -0.043                             | 0.109 | 667.3 | 700.3 | 718.5 | 767.6 | 798.5 | 859.6    | 925.6 | 963.1 | 1029.8 | 1057   | 1110.4                           | -0.148 | 0.097 | 666.9 | 695.3 | 711   | 753.1 | 779.6 | 831.8    | 888.1 | 920.1 | 976.9 | 1000   | 1045.3 |
| 9                                  | 0.045                              | 0.113 | 655.5 | 689.9 | 708.8 | 759.8 | 791.8 | 854.9    | 922.8 | 961.3 | 1029.5 | 1057.2 | 1111.4                           | -0.132 | 0.098 | 659.5 | 688.1 | 703.8 | 746.2 | 772.8 | 825.3    | 881.8 | 913.9 | 971   | 994.2  | 1039.7 |
| 9.5                                | 0.129                              | 0.117 | 645.4 | 680.9 | 700.4 | 753   | 785.8 | 850.5    | 919.6 | 958.8 | 1027.8 | 1055.7 | 1110.2                           | -0.117 | 0.099 | 651.3 | 680   | 695.7 | 738.2 | 764.9 | 817.4    | 874.1 | 906.3 | 963.5 | 986.7  | 1032.3 |
| 10                                 | 0.208                              | 0.119 | 637.1 | 673.6 | 693.6 | 747.3 | 780.7 | 846.3    | 916.1 | 955.4 | 1024.5 | 1052.3 | 1106.5                           | -0.103 | 0.1   | 642.1 | 670.7 | 686.4 | 728.9 | 755.6 | 808.2    | 864.8 | 897   | 954.2 | 977.4  | 1023   |
| 10.5                               | 0.283                              | 0.119 | 630.8 | 668   | 688.3 | 742.7 | 776.4 | 842.3    | 912.1 | 951.2 | 1019.6 | 1047   | 1100.3                           | -0.089 | 0.101 | 631.7 | 660.2 | 675.9 | 718.3 | 744.9 | 797.3    | 853.8 | 885.9 | 942.9 | 966    | 1011.5 |
| 11                                 | 0.355                              | 0.119 | 626.6 | 664.1 | 684.6 | 739.2 | 772.9 | 838.5    | 907.6 | 946.1 | 1013.2 | 1040   | 1091.9                           | -0.077 | 0.102 | 620.1 | 648.5 | 664.1 | 706.3 | 732.7 | 784.9    | 841.1 | 873   | 929.6 | 952.6  | 997.8  |
| 11.5                               | 0.423                              | 0.118 | 624.2 | 661.9 | 682.3 | 736.7 | 770.2 | 834.9    | 902.7 | 940.3 | 1005.6 | 1031.5 | 1081.7                           | -0.064 | 0.103 | 607.6 | 635.8 | 651.3 | 693.1 | 719.4 | 771.1    | 826.9 | 858.5 | 914.7 | 937.5  | 982.3  |
| 12                                 | 0.489                              | 0.115 | 623.4 | 660.9 | 681.2 | 735   | 768   | 831.5    | 897.5 | 934.1 | 997.1  | 1022.1 | 1070.2                           | -0.052 | 0.104 | 594.6 | 622.5 | 637.8 | 679.3 | 705.3 | 756.5    | 811.7 | 843   | 898.6 | 921.2  | 965.5  |
| 12.5                               | 0.552                              | 0.113 | 623.6 | 660.8 | 680.9 | 733.9 | 766.2 | 828.2    | 892.4 | 927.7 | 988.4  | 1012.4 | 1058.4                           | -0.041 | 0.105 | 581.4 | 609   | 624.2 | 665.2 | 690.9 | 741.6    | 796.2 | 827.2 | 882.2 | 904.5  | 948.3  |
| 13                                 | 0.612                              | 0.11  | 624.4 | 661.1 | 680.9 | 733   | 764.7 | 825.1    | 887.3 | 921.4 | 979.8  | 1002.8 | 1046.9                           | -0.03  | 0.106 | 568.6 | 595.9 | 610.9 | 651.5 | 676.9 | 727      | 781   | 811.6 | 866   | 888    | 931.3  |
| 13.5                               | 0.671                              | 0.108 | 625.1 | 661.4 | 681   | 732.1 | 763.2 | 822.1    | 882.5 | 915.4 | 971.8  | 993.9  | 1036.1                           | -0.02  | 0.107 | 556.5 | 583.6 | 598.4 | 638.6 | 663.7 | 713.3    | 766.7 | 797   | 850.8 | 872.6  | 915.4  |
| 14                                 | 0.727                              | 0.105 | 625.5 | 661.5 | 680.7 | 731.2 | 761.6 | 819.2    | 878   | 910   | 964.5  | 985.8  | 1026.5                           | -0.01  | 0.108 | 545.7 | 572.4 | 587.2 | 626.9 | 651.8 | 701      | 753.9 | 783.9 | 837.1 | 858.7  | 901    |
| 14.5                               | 0.781                              | 0.104 | 625.3 | 661   | 680.1 | 729.9 | 759.9 | 816.5    | 873.9 | 905.1 | 958.1  | 978.8  | 1018.1                           | 0      | 0.109 | 536.2 | 562.8 | 577.4 | 616.9 | 641.6 | 690.4    | 742.9 | 772.7 | 825.5 | 846.9  | 888.9  |
| 15                                 | 0.833                              | 0.102 | 624.4 | 660   | 679   | 728.4 | 758.1 | 813.8    | 870.3 | 900.8 | 952.5  | 972.7  | 1011                             | 0.009  | 0.109 | 528.3 | 554.7 | 569.3 | 608.5 | 633.1 | 681.7    | 733.9 | 763.5 | 816   | 837.3  | 879.1  |
| 15.5                               | 0.884                              | 0.101 | 622.9 | 658.5 | 677.5 | 726.6 | 756.1 | 811.3    | 866.9 | 897   | 947.7  | 967.5  | 1005                             | 0.018  | 0.11  | 521.7 | 548.1 | 562.6 | 601.7 | 626.3 | 674.7    | 726.7 | 756.2 | 808.6 | 829.8  | 871.4  |
| 16                                 | 0.933                              | 0.101 | 620.9 | 656.6 | 675.6 | 724.7 | 754   | 808.8    | 863.9 | 893.6 | 943.6  | 963    | 999.8                            | 0.027  | 0.111 | 516.3 | 542.7 | 557.2 | 596.3 | 620.8 | 669.1    | 721.1 | 750.5 | 802.8 | 824    | 865.5  |
| 16.5                               | 0.98                               | 0.1   | 618.6 | 654.5 | 673.5 | 722.7 | 751.9 | 806.5    | 861.1 | 890.4 | 939.8  | 959    | 995.2                            | 0.036  | 0.112 | 511.8 | 538.1 | 552.6 | 591.7 | 616.2 | 664.6    | 716.5 | 746   | 798.2 | 819.4  | 860.9  |
| 17                                 | 1.026                              | 0.1   | 616.2 | 652.3 | 671.4 | 720.6 | 749.8 | 804.2    | 858.4 | 887.5 | 936.3  | 955.3  | 991                              | 0.044  | 0.113 | 507.8 | 534.2 | 548.7 | 587.9 | 612.4 | 660.8    | 712.8 | 742.3 | 794.5 | 815.7  | 857.2  |
| 17.5                               | 1.071                              | 0.1   | 613.8 | 650.1 | 669.3 | 718.6 | 747.8 | 802      | 855.9 | 884.7 | 933.1  | 951.8  | 987                              | 0.052  | 0.113 | 504.3 | 530.7 | 545.2 | 584.4 | 609   | 657.5    | 709.5 | 739.1 | 791.3 | 812.5  | 854.1  |
| 18                                 | 1.114                              | 0.1   | 611.4 | 647.9 | 667.2 | 716.6 | 745.8 | 799.8    | 853.4 | 882.1 | 929.9  | 948.4  | 983.2                            | 0.06   | 0.114 | 501   | 527.5 | 542   | 581.3 | 605.9 | 654.4    | 706.6 | 736.1 | 788.5 | 809.7  | 851.3  |

Supplementary Table 26. Smoothed percentiles for mBIA resistance / height in standing position, for female and male 5 to 18 years.

| BIA standing Resistance (Ω) / height (cm) |                                        |       |      |      |      |      |      |          |      |      |      |      |                                      |        |       |      |      |      |      |      |          |      |      |      |      |      |
|-------------------------------------------|----------------------------------------|-------|------|------|------|------|------|----------|------|------|------|------|--------------------------------------|--------|-------|------|------|------|------|------|----------|------|------|------|------|------|
| Age (years)                               | Female LMS parameters modeled centiles |       |      |      |      |      |      |          |      |      |      |      | Male LMS parameters modeled centiles |        |       |      |      |      |      |      |          |      |      |      |      |      |
|                                           | L                                      | S     | 1th  | 3th  | 5th  | 15th | 25th | 50th (M) | 75th | 85th | 95th | 97th | 99th                                 | L      | S     | 1th  | 3th  | 5th  | 15th | 25th | 50th (M) | 75th | 85th | 95th | 97th | 99th |
| 5                                         | 0.605                                  | 0.106 | 6.33 | 6.62 | 6.78 | 7.22 | 7.49 | 8.02     | 8.59 | 8.91 | 9.48 | 9.71 | 10.16                                | 0.164  | 0.105 | 6.08 | 6.38 | 6.54 | 6.98 | 7.26 | 7.8      | 8.36 | 8.68 | 9.24 | 9.47 | 9.9  |
| 5.5                                       | 0.576                                  | 0.105 | 6.09 | 6.38 | 6.53 | 6.95 | 7.21 | 7.73     | 8.29 | 8.6  | 9.16 | 9.39 | 9.83                                 | 0.122  | 0.107 | 5.96 | 6.26 | 6.42 | 6.86 | 7.13 | 7.67     | 8.24 | 8.57 | 9.13 | 9.36 | 9.8  |
| 6                                         | 0.549                                  | 0.106 | 5.85 | 6.13 | 6.28 | 6.69 | 6.94 | 7.45     | 7.99 | 8.3  | 8.85 | 9.07 | 9.5                                  | 0.084  | 0.109 | 5.74 | 6.03 | 6.19 | 6.62 | 6.89 | 7.42     | 7.98 | 8.3  | 8.86 | 9.09 | 9.53 |
| 6.5                                       | 0.525                                  | 0.108 | 5.64 | 5.9  | 6.05 | 6.45 | 6.69 | 7.19     | 7.72 | 8.02 | 8.56 | 8.78 | 9.21                                 | 0.049  | 0.111 | 5.5  | 5.78 | 5.94 | 6.36 | 6.62 | 7.13     | 7.69 | 8    | 8.56 | 8.79 | 9.23 |
| 7                                         | 0.502                                  | 0.113 | 5.46 | 5.72 | 5.86 | 6.25 | 6.5  | 6.98     | 7.51 | 7.81 | 8.34 | 8.56 | 8.98                                 | 0.018  | 0.113 | 5.32 | 5.59 | 5.75 | 6.16 | 6.41 | 6.92     | 7.47 | 7.78 | 8.34 | 8.56 | 9    |
| 7.5                                       | 0.481                                  | 0.119 | 5.31 | 5.57 | 5.71 | 6.09 | 6.34 | 6.82     | 7.34 | 7.64 | 8.18 | 8.39 | 8.82                                 | -0.011 | 0.115 | 5.2  | 5.47 | 5.62 | 6.03 | 6.29 | 6.79     | 7.34 | 7.65 | 8.21 | 8.44 | 8.88 |
| 8                                         | 0.461                                  | 0.126 | 5.15 | 5.4  | 5.55 | 5.93 | 6.17 | 6.65     | 7.18 | 7.48 | 8.01 | 8.23 | 8.67                                 | -0.037 | 0.117 | 5.08 | 5.35 | 5.5  | 5.9  | 6.16 | 6.67     | 7.21 | 7.53 | 8.09 | 8.32 | 8.77 |
| 8.5                                       | 0.443                                  | 0.133 | 4.97 | 5.23 | 5.37 | 5.75 | 5.99 | 6.47     | 6.99 | 7.29 | 7.83 | 8.05 | 8.49                                 | -0.061 | 0.12  | 4.93 | 5.19 | 5.34 | 5.74 | 5.99 | 6.5      | 7.05 | 7.36 | 7.92 | 8.15 | 8.61 |
| 9                                         | 0.425                                  | 0.139 | 4.79 | 5.04 | 5.18 | 5.56 | 5.8  | 6.28     | 6.8  | 7.1  | 7.65 | 7.87 | 8.31                                 | -0.084 | 0.122 | 4.76 | 5.03 | 5.17 | 5.56 | 5.81 | 6.31     | 6.86 | 7.17 | 7.73 | 7.96 | 8.42 |
| 9.5                                       | 0.408                                  | 0.145 | 4.62 | 4.87 | 5.01 | 5.38 | 5.62 | 6.09     | 6.62 | 6.92 | 7.46 | 7.69 | 8.13                                 | -0.105 | 0.125 | 4.6  | 4.86 | 5    | 5.39 | 5.63 | 6.12     | 6.66 | 6.98 | 7.54 | 7.77 | 8.22 |
| 10                                        | 0.393                                  | 0.148 | 4.45 | 4.69 | 4.83 | 5.2  | 5.43 | 5.9      | 6.42 | 6.73 | 7.27 | 7.5  | 7.94                                 | -0.125 | 0.127 | 4.44 | 4.69 | 4.83 | 5.21 | 5.45 | 5.94     | 6.47 | 6.78 | 7.33 | 7.56 | 8.02 |
| 10.5                                      | 0.378                                  | 0.149 | 4.28 | 4.52 | 4.65 | 5.01 | 5.24 | 5.71     | 6.22 | 6.52 | 7.06 | 7.29 | 7.74                                 | -0.144 | 0.129 | 4.28 | 4.53 | 4.66 | 5.03 | 5.27 | 5.74     | 6.26 | 6.57 | 7.12 | 7.34 | 7.8  |
| 11                                        | 0.364                                  | 0.148 | 4.1  | 4.33 | 4.46 | 4.82 | 5.04 | 5.5      | 6.01 | 6.3  | 6.84 | 7.06 | 7.51                                 | -0.162 | 0.13  | 4.12 | 4.35 | 4.48 | 4.84 | 5.07 | 5.53     | 6.04 | 6.34 | 6.88 | 7.1  | 7.55 |
| 11.5                                      | 0.35                                   | 0.144 | 3.93 | 4.15 | 4.28 | 4.62 | 4.84 | 5.29     | 5.78 | 6.07 | 6.6  | 6.82 | 7.25                                 | -0.178 | 0.131 | 3.95 | 4.17 | 4.3  | 4.65 | 4.87 | 5.31     | 5.81 | 6.1  | 6.62 | 6.83 | 7.27 |
| 12                                        | 0.337                                  | 0.138 | 3.76 | 3.98 | 4.1  | 4.43 | 4.64 | 5.07     | 5.55 | 5.83 | 6.34 | 6.55 | 6.98                                 | -0.194 | 0.131 | 3.78 | 3.99 | 4.11 | 4.44 | 4.66 | 5.08     | 5.56 | 5.83 | 6.34 | 6.55 | 6.96 |
| 12.5                                      | 0.324                                  | 0.132 | 3.6  | 3.81 | 3.92 | 4.24 | 4.45 | 4.86     | 5.32 | 5.59 | 6.08 | 6.29 | 6.7                                  | -0.209 | 0.131 | 3.61 | 3.82 | 3.93 | 4.24 | 4.45 | 4.85     | 5.31 | 5.57 | 6.05 | 6.25 | 6.65 |
| 13                                        | 0.312                                  | 0.125 | 3.46 | 3.66 | 3.77 | 4.07 | 4.26 | 4.66     | 5.1  | 5.35 | 5.82 | 6.02 | 6.41                                 | -0.224 | 0.131 | 3.46 | 3.65 | 3.76 | 4.06 | 4.25 | 4.64     | 5.07 | 5.32 | 5.78 | 5.97 | 6.35 |
| 13.5                                      | 0.301                                  | 0.12  | 3.33 | 3.52 | 3.62 | 3.91 | 4.1  | 4        |      |      |      |      |                                      |        |       |      |      |      |      |      |          |      |      |      |      |      |

Part 3. Body composition by segments with Dual X-ray absorptiometry.

Supplementary Table 27. Smoothed percentiles for total fat mass for female and male 5 to 18 years.

| Age  | DXA Total Fat Mass (kg)            |       |       |       |       |       |       |          |       |       |       |       |       |                                  |       |      |      |      |      |      |          |       |       |       |       |       |
|------|------------------------------------|-------|-------|-------|-------|-------|-------|----------|-------|-------|-------|-------|-------|----------------------------------|-------|------|------|------|------|------|----------|-------|-------|-------|-------|-------|
|      | Female LMS parameters and centiles |       |       |       |       |       |       |          |       |       |       |       |       | Male LMS parameters and centiles |       |      |      |      |      |      |          |       |       |       |       |       |
|      | L                                  | S     | 1th   | 3th   | 5th   | 15th  | 25th  | 50th (M) | 75th  | 85th  | 95th  | 97th  | 99th  | L                                | S     | 1th  | 3th  | 5th  | 15th | 25th | 50th (M) | 75th  | 85th  | 95th  | 97th  | 99th  |
| 5    | -1.134                             | 0.232 | 3.28  | 3.5   | 3.63  | 4.03  | 4.32  | 4.99     | 5.92  | 6.6   | 8.21  | 9.09  | 11.46 | -0.576                           | 0.265 | 2.79 | 2.97 | 3.08 | 3.44 | 3.74 | 4.52     | 5.59  | 6.23  | 7.39  | 7.87  | 8.85  |
| 5.5  | -1.042                             | 0.245 | 3.42  | 3.67  | 3.82  | 4.27  | 4.59  | 5.35     | 6.41  | 7.19  | 9.02  | 10.02 | 12.7  | -0.546                           | 0.278 | 2.74 | 2.93 | 3.04 | 3.42 | 3.73 | 4.55     | 5.68  | 6.36  | 7.6   | 8.12  | 9.17  |
| 6    | -0.958                             | 0.259 | 3.56  | 3.84  | 4.01  | 4.51  | 4.88  | 5.73     | 6.94  | 7.82  | 9.91  | 11.05 | 14.08 | -0.521                           | 0.292 | 2.85 | 3.05 | 3.18 | 3.59 | 3.93 | 4.85     | 6.13  | 6.91  | 8.33  | 8.93  | 10.15 |
| 6.5  | -0.88                              | 0.275 | 3.68  | 4     | 4.18  | 4.74  | 5.15  | 6.12     | 7.49  | 8.49  | 10.89 | 12.19 | 15.66 | -0.499                           | 0.309 | 3.03 | 3.26 | 3.4  | 3.87 | 4.26 | 5.31     | 6.81  | 7.73  | 9.43  | 10.14 | 11.62 |
| 7    | -0.809                             | 0.292 | 3.78  | 4.12  | 4.33  | 4.96  | 5.41  | 6.5      | 8.06  | 9.2   | 11.94 | 13.44 | 17.43 | -0.48                            | 0.327 | 3.24 | 3.5  | 3.67 | 4.2  | 4.64 | 5.87     | 7.65  | 8.74  | 10.8  | 11.68 | 13.49 |
| 7.5  | -0.742                             | 0.31  | 3.87  | 4.24  | 4.47  | 5.16  | 5.67  | 6.89     | 8.64  | 9.94  | 13.06 | 14.77 | 19.3  | -0.463                           | 0.346 | 3.46 | 3.75 | 3.93 | 4.54 | 5.05 | 6.47     | 8.56  | 9.87  | 12.35 | 13.42 | 15.66 |
| 8    | -0.679                             | 0.326 | 3.96  | 4.37  | 4.62  | 5.38  | 5.95  | 7.3      | 9.25  | 10.7  | 14.19 | 16.1  | 21.13 | -0.449                           | 0.364 | 3.67 | 3.99 | 4.2  | 4.88 | 5.45 | 7.07     | 9.49  | 11.03 | 13.98 | 15.26 | 17.96 |
| 8.5  | -0.621                             | 0.338 | 4.09  | 4.55  | 4.82  | 5.66  | 6.28  | 7.77     | 9.93  | 11.53 | 15.35 | 17.42 | 22.82 | -0.436                           | 0.379 | 3.88 | 4.23 | 4.45 | 5.21 | 5.84 | 7.66     | 10.42 | 12.19 | 15.61 | 17.11 | 20.28 |
| 9    | -0.565                             | 0.346 | 4.29  | 4.78  | 5.08  | 6     | 6.68  | 8.33     | 10.7  | 12.43 | 16.56 | 18.76 | 24.4  | -0.424                           | 0.392 | 4.07 | 4.45 | 4.7  | 5.52 | 6.21 | 8.22     | 11.3  | 13.29 | 17.17 | 18.89 | 22.52 |
| 9.5  | -0.513                             | 0.351 | 4.54  | 5.08  | 5.41  | 6.43  | 7.18  | 8.98     | 11.56 | 13.43 | 17.82 | 20.12 | 25.9  | -0.414                           | 0.402 | 4.25 | 4.66 | 4.93 | 5.81 | 6.56 | 8.75     | 12.13 | 14.32 | 18.61 | 20.52 | 24.58 |
| 10   | -0.464                             | 0.353 | 4.84  | 5.44  | 5.81  | 6.93  | 7.75  | 9.71     | 12.5  | 14.5  | 19.1  | 21.47 | 27.3  | -0.404                           | 0.409 | 4.43 | 4.87 | 5.15 | 6.09 | 6.89 | 9.24     | 12.88 | 15.25 | 19.9  | 21.97 | 26.38 |
| 10.5 | -0.416                             | 0.352 | 5.19  | 5.85  | 6.24  | 7.47  | 8.36  | 10.49    | 13.47 | 15.58 | 20.35 | 22.76 | 28.56 | -0.395                           | 0.414 | 4.59 | 5.05 | 5.35 | 6.34 | 7.19 | 9.67     | 13.53 | 16.06 | 21.01 | 23.21 | 27.9  |
| 11   | -0.371                             | 0.349 | 5.57  | 6.29  | 6.73  | 8.06  | 9.03  | 11.32    | 14.47 | 16.68 | 21.57 | 23.99 | 29.71 | -0.387                           | 0.417 | 4.74 | 5.22 | 5.52 | 6.56 | 7.44 | 10.04    | 14.09 | 16.73 | 21.9  | 24.21 | 29.1  |
| 11.5 | -0.328                             | 0.344 | 6     | 6.79  | 7.27  | 8.71  | 9.76  | 12.2     | 15.53 | 17.82 | 22.8  | 25.23 | 30.84 | -0.38                            | 0.419 | 4.86 | 5.35 | 5.67 | 6.74 | 7.66 | 10.35    | 14.54 | 17.27 | 22.61 | 24.99 | 30.03 |
| 12   | -0.287                             | 0.337 | 6.48  | 7.34  | 7.86  | 9.42  | 10.55 | 13.15    | 16.64 | 19    | 24.06 | 26.48 | 31.98 | -0.373                           | 0.42  | 4.96 | 5.47 | 5.79 | 6.9  | 7.84 | 10.6     | 14.9  | 17.69 | 23.16 | 25.58 | 30.71 |
| 12.5 | -0.248                             | 0.33  | 7     | 7.93  | 8.49  | 10.18 | 11.38 | 14.13    | 17.77 | 20.21 | 25.32 | 27.73 | 33.12 | -0.367                           | 0.42  | 5.05 | 5.57 | 5.9  | 7.03 | 7.99 | 10.81    | 15.2  | 18.04 | 23.59 | 26.04 | 31.23 |
| 13   | -0.21                              | 0.323 | 7.53  | 8.53  | 9.14  | 10.94 | 12.21 | 15.11    | 18.88 | 21.37 | 26.52 | 28.92 | 34.19 | -0.361                           | 0.42  | 5.13 | 5.66 | 6    | 7.15 | 8.13 | 11       | 15.46 | 18.34 | 23.95 | 26.42 | 31.63 |
| 13.5 | -0.173                             | 0.315 | 8.04  | 9.12  | 9.76  | 11.67 | 13.02 | 16.04    | 19.92 | 22.45 | 27.62 | 29.99 | 35.14 | -0.356                           | 0.42  | 5.21 | 5.75 | 6.09 | 7.26 | 8.26 | 11.18    | 15.69 | 18.61 | 24.26 | 26.75 | 31.97 |
| 14   | -0.138                             | 0.308 | 8.52  | 9.66  | 10.34 | 12.35 | 13.75 | 16.88    | 20.85 | 23.41 | 28.56 | 30.9  | 35.93 | -0.351                           | 0.419 | 5.29 | 5.84 | 6.19 | 7.37 | 8.39 | 11.35    | 15.91 | 18.86 | 24.55 | 27.04 | 32.27 |
| 14.5 | -0.104                             | 0.302 | 8.95  | 10.15 | 10.86 | 12.95 | 14.4  | 17.62    | 21.64 | 24.22 | 29.34 | 31.63 | 36.53 | -0.346                           | 0.418 | 5.37 | 5.92 | 6.27 | 7.48 | 8.51 | 11.51    | 16.13 | 19.09 | 24.82 | 27.32 | 32.56 |
| 15   | -0.071                             | 0.296 | 9.31  | 10.56 | 11.3  | 13.46 | 14.95 | 18.23    | 22.3  | 24.87 | 29.93 | 32.19 | 36.95 | -0.342                           | 0.417 | 5.44 | 6    | 6.36 | 7.58 | 8.63 | 11.66    | 16.33 | 19.33 | 25.08 | 27.59 | 32.83 |
| 15.5 | -0.04                              | 0.291 | 9.6   | 10.9  | 11.65 | 13.87 | 15.4  | 18.72    | 22.8  | 25.36 | 30.35 | 32.55 | 37.18 | -0.338                           | 0.417 | 5.51 | 6.08 | 6.45 | 7.69 | 8.74 | 11.82    | 16.53 | 19.55 | 25.34 | 27.86 | 33.11 |
| 16   | -0.009                             | 0.286 | 9.82  | 11.15 | 11.93 | 14.19 | 15.74 | 19.08    | 23.15 | 25.69 | 30.59 | 32.74 | 37.22 | -0.334                           | 0.416 | 5.58 | 6.16 | 6.53 | 7.79 | 8.85 | 11.97    | 16.73 | 19.78 | 25.6  | 28.13 | 33.39 |
| 16.5 | 0.021                              | 0.282 | 9.98  | 11.33 | 12.12 | 14.41 | 15.97 | 19.32    | 23.36 | 25.86 | 30.67 | 32.76 | 37.09 | -0.33                            | 0.416 | 5.65 | 6.24 | 6.61 | 7.88 | 8.96 | 12.11    | 16.93 | 20    | 25.85 | 28.39 | 33.68 |
| 17   | 0.05                               | 0.278 | 10.07 | 11.44 | 12.24 | 14.54 | 16.1  | 19.45    | 23.45 | 25.9  | 30.59 | 32.62 | 36.8  | -0.327                           | 0.415 | 5.71 | 6.31 | 6.69 | 7.97 | 9.07 | 12.26    | 17.12 | 20.21 | 26.11 | 28.66 | 33.96 |
| 17.5 | 0.078                              | 0.275 | 10.1  | 11.49 | 12.29 | 14.6  | 16.16 | 19.48    | 23.42 | 25.82 | 30.39 | 32.35 | 36.37 | -0.323                           | 0.415 | 5.77 | 6.38 | 6.76 | 8.06 | 9.17 | 12.39    | 17.3  | 20.42 | 26.36 | 28.93 | 34.25 |
| 18   | 0.105                              | 0.272 | 10.1  | 11.49 | 12.29 | 14.6  | 16.15 | 19.44    | 23.31 | 25.66 | 30.09 | 31.98 | 35.85 | -0.32                            | 0.415 | 5.83 | 6.44 | 6.83 | 8.15 | 9.27 | 12.53    | 17.48 | 20.63 | 26.61 | 29.19 | 34.54 |

Supplementary Table 28. Smoothed percentiles for right arm fat mass for female and male 5 to 18 years.

| Age (years) | DXA right arm fat mass (g)           |       |       |       |       |       |       |          |        |        |        |        |                                    |        |       |       |       |       |       |       |          |       |        |        |        |        |
|-------------|--------------------------------------|-------|-------|-------|-------|-------|-------|----------|--------|--------|--------|--------|------------------------------------|--------|-------|-------|-------|-------|-------|-------|----------|-------|--------|--------|--------|--------|
|             | Female LMS parameters and percentile |       |       |       |       |       |       |          |        |        |        |        | Male LMS parameters and percentile |        |       |       |       |       |       |       |          |       |        |        |        |        |
|             | L                                    | S     | 1th   | 3th   | 5th   | 15th  | 25th  | 50th (M) | 75th   | 85th   | 95th   | 97th   | 99th                               | L      | S     | 1th   | 3th   | 5th   | 15th  | 25th  | 50th (M) | 75th  | 85th   | 95th   | 97th   | 99th   |
| 5           | -1.008                               | 0.189 | 239.6 | 254.5 | 263.1 | 288.4 | 305.9 | 344.8    | 395.2  | 428.9  | 500.7  | 535.5  | 616.5                              | -0.715 | 0.272 | 184.4 | 193.7 | 199.7 | 220.4 | 238.4 | 291.5    | 368.6 | 413.6  | 490.2  | 520.3  | 578.4  |
| 5.5         | -0.925                               | 0.207 | 241.2 | 257.6 | 267.1 | 295.3 | 314.9 | 359.0    | 416.8  | 455.9  | 540.0  | 581.3  | 678.3                              | -0.695 | 0.25  | 197.2 | 206.9 | 213.0 | 233.9 | 251.8 | 302.9    | 374.6 | 415.4  | 483.5  | 509.8  | 560.0  |
| 6           | -0.849                               | 0.225 | 243.2 | 261.3 | 271.9 | 303.2 | 325.2 | 375.0    | 441.2  | 486.3  | 584.7  | 633.4  | 749.1                              | -0.678 | 0.244 | 212.7 | 223.2 | 229.9 | 252.3 | 271.3 | 325.2    | 399.7 | 441.8  | 512.2  | 539.4  | 591.3  |
| 6.5         | -0.779                               | 0.244 | 245.3 | 265.1 | 276.8 | 311.6 | 336.2 | 392.5    | 468.2  | 520.3  | 635.4  | 692.9  | 830.9                              | -0.664 | 0.251 | 228.2 | 239.9 | 247.3 | 272.4 | 293.6 | 353.4    | 436.6 | 484.2  | 564.5  | 596.0  | 656.4  |
| 7           | -0.714                               | 0.264 | 247.1 | 268.8 | 281.7 | 320.2 | 347.7 | 411.1    | 497.4  | 557.4  | 691.3  | 758.9  | 922.4                              | -0.651 | 0.268 | 241.7 | 255.1 | 263.5 | 292.0 | 316.1 | 384.7    | 481.8 | 538.4  | 636.1  | 675.1  | 751.1  |
| 7.5         | -0.653                               | 0.283 | 249.6 | 273.3 | 287.4 | 329.9 | 360.4 | 431.4    | 528.9  | 597.3  | 751.2  | 829.4  | 1019.6                             | -0.64  | 0.289 | 253.2 | 268.3 | 277.8 | 310.2 | 337.7 | 416.9    | 531.8 | 600.5  | 722.3  | 772.1  | 871.0  |
| 8           | -0.597                               | 0.299 | 254.0 | 279.8 | 295.2 | 341.9 | 375.5 | 454.3    | 563.1  | 639.9  | 812.9  | 901.0  | 1115.4                             | -0.631 | 0.31  | 263.4 | 280.2 | 290.8 | 327.1 | 358.1 | 448.3    | 582.5 | 664.8  | 814.6  | 877.2  | 1004.3 |
| 8.5         | -0.544                               | 0.311 | 261.3 | 289.4 | 306.2 | 357.3 | 394.3 | 480.8    | 600.7  | 685.2  | 875.4  | 971.8  | 1205.1                             | -0.622 | 0.329 | 272.7 | 291.2 | 302.9 | 342.9 | 377.2 | 478.1    | 631.5 | 727.6  | 906.9  | 983.4  | 1141.6 |
| 9           | -0.494                               | 0.319 | 272.1 | 302.8 | 321.1 | 376.9 | 417.3 | 511.8    | 642.4  | 734.0  | 938.7  | 1041.6 | 1288.1                             | -0.615 | 0.344 | 281.4 | 301.3 | 314.0 | 357.4 | 394.8 | 505.4    | 676.3 | 785.4  | 993.2  | 1083.5 | 1273.2 |
| 9.5         | -0.446                               | 0.323 | 286.2 | 319.6 | 339.6 | 400.4 | 444.3 | 546.9    | 687.7  | 785.8  | 1002.5 | 1110.3 | 1365.0                             | -0.608 | 0.355 | 289.8 | 311.0 | 324.5 | 370.9 | 410.9 | 529.8    | 715.7 | 835.8  | 1068.2 | 1170.6 | 1388.1 |
| 10          | -0.402                               | 0.324 | 300.7 | 339.1 | 360.8 | 426.8 | 474.3 | 584.8    | 735.1  | 838.8  | 1065.2 | 1176.3 | 1435.0                             | -0.602 | 0.362 | 298.0 | 320.4 | 334.6 | 383.5 | 425.6 | 551.2    | 748.7 | 877.4  | 1128.7 | 1240.5 | 1479.7 |
| 10.5        | -0.359                               | 0.323 | 320.8 | 360.1 | 383.6 | 454.8 | 505.8 | 623.7    | 782.5  | 890.9  | 1124.2 | 1237.2 | 1496.4                             | -0.597 | 0.366 | 305.6 | 328.9 | 343.8 | 394.7 | 438.5 | 569.2    | 775.1 | 909.9  | 1174.6 | 1292.9 | 1547.2 |
| 11          | -0.318                               | 0.32  | 340.1 | 382.5 | 407.8 | 484.0 | 538.4 | 663.4    | 829.5  | 941.7  | 1179.9 | 1293.6 | 1550.9                             | -0.592 | 0.367 | 312.1 | 336.2 | 351.6 | 404.1 | 449.3 | 583.6    | 795.4 | 934.2  | 1207.7 | 1330.3 | 1594.4 |
| 11.5        | -0.279                               | 0.316 | 361.1 | 406.7 | 433.7 | 515.1 | 572.8 | 704.5    | 877.4  | 992.9  | 1234.6 | 1348.4 | 1602.7                             | -0.587 | 0.368 | 317.3 | 342.0 | 357.7 | 411.5 | 457.7 | 594.6    | 810.3 | 951.8  | 1230.8 | 1356.1 | 1626.4 |
| 12          | -0.242                               | 0.311 | 383.6 | 432.4 | 461.3 | 547.7 | 608.8 | 747.0    | 926.3  | 1044.6 | 1289.1 | 1402.8 | 1653.7                             | -0.583 | 0.368 | 321.3 | 346.6 | 362.6 | 417.3 | 464.2 | 603.0    | 821.2 | 964.2  | 1246.7 | 1373.5 | 1647.4 |
| 12.5        | -0.206                               | 0.306 | 407.1 | 459.1 | 489.8 | 581.4 | 645.8 | 790.2    | 975.4  | 1096.3 | 1343.1 | 1456.5 | 1704.0                             | -0.579 | 0.367 | 324.7 | 350.3 | 366.6 | 422.1 | 469.6 | 609.7    | 829.3 | 973.3  | 1257.5 | 1385.2 | 1660.9 |
| 13          | -0.172                               | 0.3   | 430.5 | 485.8 | 518.3 | 614.9 | 682.4 | 832.6    | 1023.2 | 1146.4 | 1394.9 | 1507.9 | 1752.0                             | -0.576 | 0.366 | 327.6 | 353.6 | 370.1 | 426.2 | 474.1 | 615.2    | 835.8 | 980.2  | 1265.3 | 1393.3 | 1669.7 |
| 13.5        | -0.139                               | 0.295 | 453.2 | 511.5 | 545.8 | 647.1 | 717.4 | 873.1    | 1068.3 | 1193.4 | 1443.0 | 1555.5 | 1796.1                             | -0.572 | 0.365 | 330.4 | 356.7 | 373.4 | 430.1 | 478.4 | 620.2    | 841.4 | 986.0  | 1271.4 | 1399.5 | 1675.9 |
| 14          | -0.107                               | 0.29  | 474.3 | 535.5 | 571.5 | 677.1 | 750.0 | 910.4    | 1109.7 | 1236.1 | 1486.3 | 1598.0 | 1835.2                             | -0.569 | 0.364 | 333.2 | 359.9 | 376.7 | 433.9 | 482.6 | 625.1    | 846.8 | 991.5  | 1276.9 | 1404.9 | 1680.9 |
| 14.5        | -0.076                               | 0.286 | 493.3 | 557.2 | 594.6 | 704.1 | 779.4 | 944.0    | 1146.4 | 1274.0 | 1524.1 | 1634.8 | 1868.4                             | -0.566 | 0.363 | 336.2 | 363.1 | 380.2 | 437.9 | 487.0 | 630.1    | 852.3 | 997.1  | 1282.4 | 1410.3 | 1685.9 |
| 15          | -0.047                               | 0.282 | 509.7 | 576.1 | 614.8 | 727.8 | 805.2 | 973.2    | 1178.2 | 1306.4 | 1555.9 | 1665.7 | 1895.6                             | -0.564 | 0.362 | 339.3 | 366.5 | 383.7 | 442.0 | 491.4 | 635.3    | 858.0 | 1002.9 | 1288.3 | 1416.1 | 1691.3 |
| 15.5        | -0.018                               | 0.279 | 523.3 | 591.8 | 631.7 | 747.8 | 826.8 | 997.7    | 1204.6 | 1333.1 | 1581.5 | 1690.1 | 1916.2                             | -0.561 | 0.36  | 342.4 | 369.9 | 387.3 | 446.1 | 495.9 | 640.6    | 863.9 | 1009.1 | 1294.8 | 1422.6 | 1697.7 |
| 16          | 0.01                                 | 0.276 | 533.9 | 604.2 | 645.1 | 763.6 | 844.1 | 1017.1   | 1225.2 | 1353.6 | 1600.3 | 1707.5 | 1929.7                             | -0.559 | 0.359 | 345.5 | 373.4 | 391.0 | 450.3 | 500.5 | 646.0    | 870.1 | 1015.7 | 1301.8 | 1429.8 | 1705.1 |
| 16.5        | 0.037                                | 0.274 | 541.3 | 613.1 | 654.8 | 775.3 | 856.8 | 1031.3   | 1239.7 | 1367.7 | 1612.1 | 1717.7 | 1935.7                             | -0.557 | 0.359 | 348.7 | 376.8 | 394.6 | 454.5 | 505.1 | 651.5    | 876.5 | 1022.6 | 1309.5 | 1437.8 | 1713.5 |
| 17          | 0.063                                | 0.272 | 545.6 | 618.6 | 660.9 | 782.8 | 865.0 | 1040.2   | 1248.2 | 1375.3 | 1616.7 | 1720.5 | 1933.9                             | -0.554 | 0.358 | 351.7 | 380.2 | 398.1 | 458.7 | 509.7 | 657.0    | 883.1 | 1029.7 | 1317.6 | 1446.3 | 1722.9 |
| 17.5        | 0.089                                | 0.27  | 547.1 | 621.0 | 663.7 | 786.5 | 869.0 | 1044.2   | 1251.0 | 1376.7 | 1614.4 | 1716.1 | 1924.5                             | -0.552 | 0.357 | 354.7 | 383.4 | 401.6 | 462.7 | 514.1 | 662.4    | 889.6 | 1036.9 | 1326.1 | 1455.3 | 1732.9 |
| 18          | 0.113                                | 0.268 | 546.3 | 620.8 | 663.8 | 787.0 | 869.5 | 1044.1   | 1249.0 | 1373.1 | 1606.4 | 1705.9 | 1908.9                             | -0.551 | 0.357 | 357.5 | 386.6 | 404.9 | 466.5 | 518.4 | 667.7    | 896.1 | 1044.2 | 1334.8 | 1464.7 | 1743.6 |

Supplementary Table 29. Smoothed percentiles for right leg fat mass for female and male 5 to 18 years.

| Age (years) | DXA right leg fat mass (g)           |       |        |        |        |        |        |          |        |        |        |        |                                    |        |       |        |        |        |        |        |          |        |        |        |        |        |
|-------------|--------------------------------------|-------|--------|--------|--------|--------|--------|----------|--------|--------|--------|--------|------------------------------------|--------|-------|--------|--------|--------|--------|--------|----------|--------|--------|--------|--------|--------|
|             | Female LMS parameters and percentile |       |        |        |        |        |        |          |        |        |        |        | Male LMS parameters and percentile |        |       |        |        |        |        |        |          |        |        |        |        |        |
|             | L                                    | S     | 1th    | 3th    | 5th    | 15th   | 25th   | 50th (M) | 75th   | 85th   | 95th   | 97th   | 99th                               | L      | S     | 1th    | 3th    | 5th    | 15th   | 25th   | 50th (M) | 75th   | 85th   | 95th   | 97th   | 99th   |
| 5           | -0.917                               | 0.221 | 640.5  | 686.3  | 713.2  | 792.8  | 848.7  | 976.0    | 1145.6 | 1262.0 | 1518.5 | 1646.9 | 1955.8                             | -0.301 | 0.264 | 527.7  | 566.2  | 589.8  | 665.7  | 725.5  | 881.1    | 1083.0 | 1196.7 | 1390.9 | 1467.6 | 1615.9 |
| 5.5         | -0.857                               | 0.235 | 664.0  | 714.7  | 744.5  | 833.2  | 895.9  | 1039.3   | 1232.1 | 1365.4 | 1661.2 | 1810.2 | 2171.2                             | -0.299 | 0.279 | 518.8  | 559.4  | 584.4  | 664.4  | 727.5  | 891.8    | 1107.9 | 1231.6 | 1447.0 | 1533.5 | 1702.7 |
| 6           | -0.803                               | 0.249 | 688.4  | 744.2  | 777.2  | 875.7  | 945.7  | 1106.8   | 1325.1 | 1477.1 | 1816.7 | 1988.8 | 2408.1                             | -0.297 | 0.293 | 531.4  | 575.8  | 603.0  | 690.6  | 759.6  | 939.7    | 1179.4 | 1319.0 | 1566.4 | 1667.2 | 1866.8 |
| 6.5         | -0.754                               | 0.263 | 712.3  | 773.6  | 810.0  | 919.1  | 996.9  | 1177.2   | 1423.6 | 1596.2 | 1984.8 | 2182.9 | 2668.2                             | -0.295 | 0.306 | 562.1  | 611.8  | 642.4  | 740.7  | 818.3  | 1021.1   | 1294.1 | 1455.6 | 1746.8 | 1867.3 | 2108.4 |
| 7           | -0.707                               | 0.276 | 736.7  | 804.0  | 843.9  | 964.3  | 1050.7 | 1251.8   | 1529.0 | 1724.4 | 2167.1 | 2394.1 | 2952.7                             | -0.293 | 0.319 | 606.1  | 662.6  | 697.5  | 809.5  | 897.9  | 1129.5   | 1444.6 | 1633.8 | 1980.4 | 2125.7 | 2419.9 |
| 7.5         | -0.665                               | 0.29  | 764.4  | 838.0  | 881.9  | 1014.6 | 1110.1 | 1334.0   | 1644.5 | 1864.5 | 2365.5 | 2623.4 | 3259.9                             | -0.291 | 0.331 | 657.0  | 721.3  | 760.9  | 888.6  | 989.2  | 1253.6   | 1616.7 | 1837.8 | 2248.8 | 2423.5 | 2780.7 |
| 8           | -0.624                               | 0.301 | 797.4  | 877.9  | 926.0  | 1072.0 | 1177.5 | 1425.4   | 1770.9 | 2016.5 | 2576.9 | 2865.7 | 3578.3                             | -0.29  | 0.342 | 709.6  | 782.1  | 826.9  | 971.0  | 1084.6 | 1383.4   | 1797.3 | 2052.4 | 2533.5 | 2740.3 | 3167.6 |
| 8.5         | -0.587                               | 0.31  | 838.2  | 926.2  | 978.9  | 1139.2 | 1255.3 | 1528.7   | 1910.2 | 2181.5 | 2799.9 | 3117.8 | 3899.3                             | -0.288 | 0.351 | 760.6  | 841.3  | 891.1  | 1051.7 | 1178.3 | 1511.2   | 1975.9 | 2265.5 | 2818.7 | 3059.2 | 3560.5 |
| 9           | -0.551                               | 0.316 | 888.4  | 984.7  | 1042.5 | 1218.4 | 1345.9 | 1646.1   | 2064.7 | 2361.6 | 3035.3 | 3379.8 | 4220.9                             | -0.287 | 0.359 | 808.8  | 897.5  | 952.3  | 1128.9 | 1268.0 | 1633.9   | 2147.6 | 2471.0 | 3095.9 | 3370.2 | 3947.0 |
| 9.5         | -0.518                               | 0.319 | 948.0  | 1053.6 | 1116.9 | 1309.6 | 1449.2 | 1777.6   | 2233.7 | 2555.7 | 3281.5 | 3649.8 | 4540.5                             | -0.286 | 0.366 | 855.6  | 952.1  | 1011.8 | 1204.1 | 1355.4 | 1752.8   | 2313.4 | 2669.5 | 3364.6 | 3672.4 | 4324.4 |
| 10          | -0.486                               | 0.321 | 1015.3 | 1130.7 | 1199.9 | 1410.2 | 1562.4 | 1919.3   | 2412.3 | 2758.2 | 3531.0 | 3919.4 | 4848.8                             | -0.285 | 0.371 | 903.3  | 1007.6 | 1072.2 | 1279.9 | 1443.2 | 1871.3   | 2477.1 | 2864.8 | 3628.1 | 3968.8 | 4695.0 |
| 10.5        | -0.455                               | 0.32  | 1087.8 | 1213.3 | 1288.5 | 1516.7 | 1681.4 | 2066.2   | 2593.8 | 2961.2 | 3773.7 | 4177.8 | 5133.4                             | -0.283 | 0.374 | 949.0  | 1060.9 | 1130.0 | 1352.5 | 1526.9 | 1983.1   | 2630.1 | 3046.6 | 3873.0 | 4244.2 | 5040.1 |
| 11          | -0.426                               | 0.318 | 1165.7 | 1301.6 | 1382.9 | 1629.1 | 1806.2 | 2217.8   | 2777.5 | 3164.0 | 4009.3 | 4425.0 | 5396.3                             | -0.282 | 0.377 | 986.9  | 1105.3 | 1178.4 | 1413.2 | 1596.9 | 2075.9   | 2755.9 | 3195.9 | 4074.5 | 4471.4 | 5326.5 |
| 11.5        | -0.399                               | 0.315 | 1251.2 | 1398.0 | 1485.6 | 1750.2 | 1939.9 | 2378.2   | 2968.6 | 3372.6 | 4246.1 | 4670.8 | 5651.2                             | -0.281 | 0.378 | 1012.6 | 1135.8 | 1211.8 | 1455.6 | 1645.9 | 2140.3   | 2842.1 | 3298.3 | 4214.1 | 4629.8 | 5529.2 |
| 12          | -0.372                               | 0.31  | 1344.2 | 1502.4 | 1596.6 | 1880.1 |        |          |        |        |        |        |                                    |        |       |        |        |        |        |        |          |        |        |        |        |        |

Supplementary Table 30. Smoothed percentiles for truncal fat mass for female and male 5 to 18 years.

| DXA Truncal fat mass (g) |                                      |       |        |        |        |        |        |          |         |         |         |         |                                    |        |       |        |        |        |        |        |          |        |         |         |         |         |
|--------------------------|--------------------------------------|-------|--------|--------|--------|--------|--------|----------|---------|---------|---------|---------|------------------------------------|--------|-------|--------|--------|--------|--------|--------|----------|--------|---------|---------|---------|---------|
| Age (y)                  | Female LMS parameters and percentile |       |        |        |        |        |        |          |         |         |         |         | Male LMS parameters and percentile |        |       |        |        |        |        |        |          |        |         |         |         |         |
|                          | L                                    | S     | 1th    | 3th    | 5th    | 15th   | 25th   | 50th (M) | 75th    | 85th    | 95th    | 97th    | 99th                               | L      | S     | 1th    | 3th    | 5th    | 15th   | 25th   | 50th (M) | 75th   | 85th    | 95th    | 97th    | 99th    |
| 5                        | -0.731                               | 0.35  | 919.6  | 1017.8 | 1077.4 | 1262.7 | 1401.1 | 1741.9   | 2257.0  | 2654.7  | 3675.6  | 4271.8  | 5990.9                             | -0.317 | 0.367 | 647.5  | 716.7  | 759.7  | 899.6  | 1011.3 | 1311.0   | 1739.4 | 2010.7  | 2536.7  | 2768.4  | 3257.0  |
| 5.5                      | -0.661                               | 0.359 | 1004.1 | 1117.2 | 1186.0 | 1400.1 | 1559.9 | 1953.1   | 2543.4  | 2994.8  | 4132.4  | 4781.7  | 6591.7                             | -0.298 | 0.39  | 716.2  | 796.5  | 846.8  | 1012.0 | 1145.9 | 1512.0   | 2045.7 | 2386.3  | 3049.5  | 3342.3  | 3961.2  |
| 6                        | -0.598                               | 0.371 | 1078.3 | 1206.9 | 1285.2 | 1529.5 | 1712.2 | 2161.5   | 2833.8  | 3344.5  | 4614.5  | 5327.3  | 7265.5                             | -0.282 | 0.413 | 783.2  | 875.1  | 932.9  | 1125.1 | 1283.1 | 1723.0   | 2376.3 | 2796.8  | 3618.9  | 3983.0  | 4754.0  |
| 6.5                      | -0.54                                | 0.388 | 1132.3 | 1276.7 | 1365.0 | 1641.5 | 1849.2 | 2362.1   | 3130.0  | 3716.8  | 5164.9  | 5971.8  | 8139.0                             | -0.266 | 0.436 | 847.9  | 951.8  | 1017.7 | 1238.7 | 1422.9 | 1944.8   | 2734.6 | 3247.4  | 4255.1  | 4702.9  | 5653.3  |
| 7                        | -0.486                               | 0.412 | 1163.2 | 1323.7 | 1422.4 | 1733.7 | 1969.3 | 2556.2   | 3446.1  | 4126.3  | 5818.3  | 6762.5  | 9293.4                             | -0.252 | 0.46  | 910.2  | 1026.7 | 1100.9 | 1352.5 | 1564.9 | 2177.5   | 3122.2 | 3741.2  | 4964.3  | 5509.8  | 6670.4  |
| 7.5                      | -0.435                               | 0.44  | 1177.6 | 1354.2 | 1463.5 | 1811.2 | 2076.8 | 2745.3   | 3771.9  | 4563.5  | 6546.3  | 7657.1  | 10637.4                            | -0.239 | 0.482 | 970.1  | 1099.3 | 1182.2 | 1465.8 | 1708.1 | 2418.7   | 3534.7 | 4272.6  | 5738.4  | 6394.4  | 7793.5  |
| 8                        | -0.388                               | 0.464 | 1191.1 | 1383.9 | 1504.0 | 1888.6 | 2184.8 | 2936.4   | 4100.9  | 5003.2  | 7267.5  | 8534.5  | 11917.3                            | -0.227 | 0.503 | 1028.7 | 1170.8 | 1262.4 | 1578.4 | 1851.6 | 2664.9   | 3963.1 | 4828.2  | 6553.8  | 7328.1  | 8981.8  |
| 8.5                      | -0.344                               | 0.481 | 1221.9 | 1432.5 | 1564.1 | 1987.6 | 2315.2 | 3148.9   | 4441.7  | 5440.8  | 7928.9  | 9307.0  | 12933.7                            | -0.215 | 0.522 | 1087.0 | 1241.8 | 1342.0 | 1690.6 | 1994.7 | 2912.5   | 4397.6 | 5393.1  | 7383.8  | 8277.8  | 10188.0 |
| 9                        | -0.302                               | 0.488 | 1281.6 | 1513.1 | 1657.9 | 2124.7 | 2485.7 | 3402.5   | 4813.2  | 5892.5  | 8537.0  | 9975.6  | 13679.2                            | -0.204 | 0.537 | 1144.6 | 1311.7 | 1420.3 | 1800.6 | 2135.3 | 3156.4   | 4826.9 | 5951.1  | 8200.3  | 9210.0  | 11365.1 |
| 9.5                      | -0.263                               | 0.488 | 1373.1 | 1629.3 | 1789.6 | 2305.4 | 2702.9 | 3705.2   | 5226.3  | 6372.3  | 9119.7  | 10581.2 | 14248.8                            | -0.194 | 0.549 | 1201.3 | 1380.3 | 1497.0 | 1907.7 | 2271.7 | 3392.5   | 5240.6 | 6486.7  | 8976.6  | 10092.1 | 12467.8 |
| 10                       | -0.226                               | 0.481 | 1493.9 | 1778.8 | 1956.6 | 2526.5 | 2962.9 | 4052.4   | 5676.2  | 6877.4  | 9688.2  | 11147.9 | 14717.8                            | -0.185 | 0.558 | 1257.3 | 1447.4 | 1571.7 | 2011.1 | 2402.8 | 3617.1   | 5630.0 | 6987.0  | 9690.2  | 10897.2 | 13459.3 |
| 10.5                     | -0.19                                | 0.47  | 1640.4 | 1957.0 | 2153.9 | 2781.3 | 3258.0 | 4433.6   | 6150.2  | 7395.4  | 10238.1 | 11679.8 | 15120.0                            | -0.176 | 0.565 | 1312.0 | 1512.5 | 1643.9 | 2109.8 | 2527.0 | 3827.1   | 5988.5 | 7442.7  | 10326.7 | 11608.5 | 14318.0 |
| 11                       | -0.156                               | 0.457 | 1813.3 | 2164.6 | 2382.3 | 3070.9 | 3589.1 | 4850.4   | 6652.9  | 7934.9  | 10792.5 | 12209.6 | 15516.0                            | -0.167 | 0.569 | 1364.5 | 1574.6 | 1712.4 | 2202.5 | 2642.9 | 4020.4   | 6312.1 | 7849.2  | 10880.1 | 12220.0 | 15038.9 |
| 11.5                     | -0.124                               | 0.442 | 2015.4 | 2405.0 | 2645.1 | 3398.8 | 3960.3 | 5308.1   | 7193.2  | 8508.3  | 11374.8 | 12766.9 | 15950.5                            | -0.159 | 0.571 | 1415.1 | 1633.9 | 1777.6 | 2289.6 | 2750.8 | 4197.1   | 6601.1 | 8206.6  | 11352.1 | 12734.3 | 15627.1 |
| 12                       | -0.093                               | 0.426 | 2248.8 | 2680.1 | 2944.4 | 3767.1 | 4373.7 | 5809.2   | 7775.2  | 9121.8  | 11996.4 | 13366.2 | 16443.3                            | -0.151 | 0.571 | 1464.7 | 1691.5 | 1840.5 | 2372.4 | 2852.4 | 4359.4   | 6858.6 | 8518.9  | 11748.7 | 13158.7 | 16093.5 |
| 12.5                     | -0.063                               | 0.411 | 2507.2 | 2982.4 | 3271.9 | 4165.6 | 4817.6 | 6339.7   | 8383.1  | 9758.9  | 12641.0 | 13991.3 | 16977.2                            | -0.143 | 0.57  | 1515.1 | 1749.4 | 1903.4 | 2453.5 | 2950.5 | 4511.2   | 7089.9 | 8792.6  | 12792.6 | 13503.9 | 16452.5 |
| 13                       | -0.034                               | 0.396 | 2779.8 | 3299.5 | 3614.4 | 4578.2 | 5274.3 | 6878.8   | 8993.2  | 10394.9 | 13282.2 | 14614.7 | 17521.5                            | -0.136 | 0.568 | 1567.6 | 1809.0 | 1967.8 | 2534.9 | 3047.6 | 4656.2   | 7300.8 | 9035.1  | 12354.8 | 13783.8 | 16723.0 |
| 13.5                     | -0.007                               | 0.382 | 3053.9 | 3616.9 | 3956.2 | 4986.7 | 5724.0 | 7403.5   | 9580.1  | 11003.0 | 13891.1 | 15206.6 | 18042.8                            | -0.129 | 0.564 | 1622.9 | 1871.4 | 2034.8 | 2618.2 | 3145.5 | 4797.4   | 7497.1 | 9254.4  | 12589.1 | 14013.9 | 16926.6 |
| 14                       | 0.02                                 | 0.37  | 3315.9 | 3919.6 | 4281.6 | 5373.3 | 6147.5 | 7892.9   | 10121.2 | 11560.1 | 14443.4 | 15741.8 | 18513.3                            | -0.123 | 0.559 | 1681.2 | 1936.7 | 2104.5 | 2703.7 | 3244.9 | 4936.4   | 7682.6 | 9456.3  | 12792.6 | 14207.3 | 17081.9 |
| 14.5                     | 0.046                                | 0.359 | 3553.3 | 4193.8 | 4576.2 | 5721.9 | 6528.3 | 8329.2   | 10598.5 | 12048.3 | 14921.1 | 16202.3 | 18913.5                            | -0.116 | 0.553 | 1742.1 | 2004.5 | 2176.7 | 2791.2 | 3345.7 | 5074.1   | 7860.3 | 9645.5  | 12973.9 | 14374.7 | 17204.2 |
| 15                       | 0.07                                 | 0.351 | 3756.1 | 4428.9 | 4829.0 | 6021.1 | 6854.5 | 8700.7   | 11000.8 | 12456.7 | 15314.3 | 16578.0 | 19232.9                            | -0.11  | 0.547 | 1805.4 | 2074.5 | 2251.1 | 2880.5 | 3447.9 | 5211.0   | 8032.3 | 9825.5  | 13140.0 | 14524.9 | 17305.8 |
| 15.5                     | 0.094                                | 0.344 | 3917.7 | 4618.0 | 5033.1 | 6263.9 | 7119.5 | 9001.6   | 11323.6 | 12781.9 | 15620.7 | 16867.1 | 19469.5                            | -0.104 | 0.541 | 1870.5 | 2146.4 | 2327.3 | 2971.4 | 3551.2 | 5347.4   | 8200.4 | 9999.5  | 13296.8 | 14664.7 | 17396.3 |
| 16                       | 0.117                                | 0.339 | 4034.3 | 4757.1 | 5184.3 | 6446.2 | 7319.1 | 9228.0   | 11563.5 | 13020.2 | 15836.3 | 17065.2 | 19617.4                            | -0.099 | 0.534 | 1937.0 | 2219.7 | 2404.8 | 3063.4 | 3655.4 | 5483.7   | 8366.4 | 10170.4 | 13449.6 | 14800.8 | 17484.7 |
| 16.5                     | 0.14                                 | 0.335 | 4104.9 | 4845.1 | 5281.6 | 6566.6 | 7451.9 | 9377.8   | 11717.4 | 13168.1 | 15955.7 | 17165.7 | 19667.2                            | -0.093 | 0.528 | 2004.6 | 2294.0 | 2483.3 | 3156.2 | 3760.4 | 5620.4   | 8532.2 | 10340.3 | 13603.3 | 14938.8 | 17578.3 |
| 17                       | 0.162                                | 0.333 | 4131.7 | 4884.3 | 5327.4 | 6627.9 | 7520.7 | 9454.6   | 11789.2 | 13229.5 | 15982.4 | 17171.8 | 19620.9                            | -0.088 | 0.522 | 2072.9 | 2368.9 | 2562.5 | 3249.8 | 3866.1 | 5757.6   | 8698.8 | 10513.0 | 13761.0 | 15082.5 | 17681.8 |
| 17.5                     | 0.183                                | 0.332 | 4120.9 | 4881.9 | 5329.2 | 6639.1 | 7535.8 | 9470.6   | 11793.7 | 13220.3 | 15934.8 | 17102.8 | 19499.4                            | -0.082 | 0.517 | 2141.6 | 2444.4 | 2642.2 | 3343.9 | 3972.3 | 5895.7   | 8867.1 | 10687.7 | 13924.6 | 15233.9 | 17797.7 |
| 18                       | 0.203                                | 0.332 | 4079.5 | 4845.7 | 5295.5 | 6610.4 | 7508.1 | 9439.0   | 11746.3 | 13157.7 | 15832.1 | 16978.7 | 19324.1                            | -0.077 | 0.511 | 2210.7 | 2520.1 | 2722.2 | 3438.3 | 4079.0 | 6034.6   | 9037.5 | 10865.8 | 14094.8 | 15393.8 | 17926.8 |

Supplementary Table 31. Smoothed percentiles for android fat mass for female and male 5 to 18 years.

| DXA Android fat mass (g) |                                      |       |       |       |       |       |       |          |       |        |        |        |                                    |        |       |       |       |       |       |       |          |       |        |        |        |        |
|--------------------------|--------------------------------------|-------|-------|-------|-------|-------|-------|----------|-------|--------|--------|--------|------------------------------------|--------|-------|-------|-------|-------|-------|-------|----------|-------|--------|--------|--------|--------|
| Age (y)                  | Female LMS parameters and percentile |       |       |       |       |       |       |          |       |        |        |        | Male LMS parameters and percentile |        |       |       |       |       |       |       |          |       |        |        |        |        |
|                          | L                                    | S     | 1th   | 3th   | 5th   | 15th  | 25th  | 50th (M) | 75th  | 85th   | 95th   | 97th   | 99th                               | L      | S     | 1th   | 3th   | 5th   | 15th  | 25th  | 50th (M) | 75th  | 85th   | 95th   | 97th   | 99th   |
| 5                        | -0.231                               | 0.48  | 79.8  | 94.9  | 104.4 | 134.6 | 157.8 | 215.6    | 301.9 | 365.9  | 515.9  | 593.9  | 785.3                              | 0.844  | 0.401 | 39.1  | 69.1  | 86.7  | 135.4 | 166.0 | 225.4    | 287.5 | 321.8  | 381.0  | 404.5  | 449.6  |
| 5.5                      | -0.233                               | 0.488 | 87.6  | 104.5 | 115.0 | 148.8 | 174.8 | 240.1    | 338.2 | 411.3  | 584.1  | 674.6  | 897.9                              | 0.292  | 0.449 | 55.7  | 73.5  | 84.8  | 117.6 | 141.3 | 193.9    | 259.2 | 300.0  | 378.5  | 412.6  | 482.8  |
| 6                        | -0.233                               | 0.5   | 94.5  | 113.1 | 124.7 | 162.2 | 191.3 | 264.6    | 376.0 | 459.8  | 659.7  | 765.3  | 1028.3                             | -0.041 | 0.49  | 67.3  | 83.0  | 92.8  | 124.1 | 147.7 | 205.1    | 286.0 | 342.5  | 465.2  | 524.5  | 658.8  |
| 6.5                      | -0.233                               | 0.519 | 99.6  | 119.8 | 132.5 | 173.9 | 206.1 | 288.6    | 415.7 | 512.6  | 747.1  | 872.8  | 1190.0                             | -0.218 | 0.527 | 74.2  | 89.6  | 99.4  | 131.2 | 156.1 | 219.9    | 318.3 | 393.2  | 574.4  | 671.3  | 914.9  |
| 7                        | -0.23                                | 0.543 | 103.1 | 124.9 | 138.7 | 184.1 | 219.8 | 312.4    | 458.0 | 570.8  | 849.0  | 1000.6 | 1389.4                             | -0.31  | 0.563 | 80.8  | 97.0  | 107.4 | 141.8 | 169.3 | 242.5    | 363.2 | 461.5  | 722.3  | 875.1  | 1301.5 |
| 7.5                      | -0.225                               | 0.568 | 105.9 | 129.3 | 144.3 | 193.8 | 233.3 | 336.9    | 503.1 | 633.8  | 962.4  | 1144.4 | 1618.6                             | -0.331 | 0.598 | 87.1  | 105.1 | 116.7 | 155.7 | 187.4 | 273.7    | 422.0 | 547.7  | 899.9  | 1117.8 | 1766.2 |
| 8                        | -0.218                               | 0.59  | 109.3 | 134.5 | 150.6 | 204.6 | 248.0 | 363.2    | 550.6 | 699.9  | 1080.1 | 1293.1 | 1854.2                             | -0.294 | 0.631 | 91.9  | 112.5 | 125.9 | 171.2 | 208.5 | 311.3    | 490.6 | 643.7  | 1074.4 | 1340.7 | 2128.3 |
| 8.5                      | -0.208                               | 0.604 | 114.7 | 142.0 | 159.2 | 218.5 | 266.2 | 393.5    | 602.4 | 769.6  | 1197.8 | 1438.6 | 2074.8                             | -0.24  | 0.66  | 95.8  | 119.4 | 134.9 | 187.9 | 231.9 | 353.9    | 566.7 | 747.1  | 1244.6 | 1544.8 | 2401.8 |
| 9                        | -0.197                               | 0.61  | 123.0 | 152.8 | 172.1 | 237.0 | 289.6 | 430.2    | 660.8 | 845.2  | 1316.0 | 1579.7 | 2273.0                             | -0.195 | 0.684 | 99.3  | 126.0 | 143.6 | 204.4 | 255.3 | 397.2    | 644.2 | 851.9  | 1414.4 | 1746.5 | 2667.6 |
| 9.5                      | -0.183                               | 0.61  | 134.3 | 167.4 | 188.8 | 260.8 | 319.0 | 474.2    | 727.2 | 928.2  | 1436.0 | 1717.5 | 2449.5                             | -0.164 | 0.703 | 103.2 | 132.8 | 152.4 | 220.7 | 278.2 | 439.2    | 719.2 | 953.8  | 1581.9 | 1947.9 | 2945.6 |
| 10                       | -0.166                               | 0.604 | 148.6 | 185.6 | 209.5 | 289.6 | 354.2 | 525.4    | 801.0 | 1017.5 | 1556.1 | 1850.3 | 2603.0                             | -0.15  | 0.716 | 108.0 | 140.1 | 161.5 | 236.4 | 299.7 | 477.5    | 788.0 | 1048.1 | 1742.9 | 2146.2 | 3239.3 |
| 10.5                     | -0.147                               | 0.594 | 165.6 | 207.0 | 233.8 | 323.1 | 394.6 | 582.4    | 880.1 | 1110.3 | 1672.3 | 1973.7 | 2730.1                             | -0.147 | 0.724 | 113.1 | 147.1 | 169.9 | 249.7 | 317.5 | 508.7    | 844.2 | 1126.2 | 1883.0 | 2323.8 | 3521.9 |
| 11                       | -0.126                               | 0.581 | 185.1 | 231.7 | 261.6 | 361.0 | 440.0 | 645.0    | 963.9 | 1206.2 | 1784.9 | 2089.0 | 2836.4                             | -0.152 | 0.728 | 117.1 | 152.4 | 175.9 | 258.8 | 329.2 | 528.7    | 880.8 | 1178.4 | 1982.9 | 2454.  |        |

Supplementary Table 32. Smoothed percentiles for gynoind fat mass for female and male 5 to 18 years.

| DXA Gynoind fat mass (g) |                                      |       |        |        |        |        |        |          |        |        |        |        |        |        |                                    |       |       |       |        |        |          |        |        |        |        |        |
|--------------------------|--------------------------------------|-------|--------|--------|--------|--------|--------|----------|--------|--------|--------|--------|--------|--------|------------------------------------|-------|-------|-------|--------|--------|----------|--------|--------|--------|--------|--------|
| Age (y)                  | Female LMS parameters and percentile |       |        |        |        |        |        |          |        |        |        |        |        |        | Male LMS parameters and percentile |       |       |       |        |        |          |        |        |        |        |        |
|                          | L                                    | S     | 1th    | 3th    | 5th    | 15th   | 25th   | 50th (M) | 75th   | 85th   | 95th   | 97th   | 99th   | L      | S                                  | 1th   | 3th   | 5th   | 15th   | 25th   | 50th (M) | 75th   | 85th   | 95th   | 97th   | 99th   |
| 5                        | -0.805                               | 0.256 | 481.9  | 521.7  | 545.3  | 616.1  | 666.5  | 783.3    | 943.1  | 1055.2 | 1308.7 | 1438.7 | 1759.5 | 0.597  | 0.303                              | 297.7 | 370.1 | 411.1 | 524.4  | 597.0  | 742.3    | 900.1  | 989.7  | 1148.0 | 1212.0 | 1336.5 |
| 5.5                      | -0.736                               | 0.269 | 499.0  | 543.1  | 569.3  | 647.9  | 704.2  | 835.0    | 1014.5 | 1140.8 | 1426.3 | 1572.5 | 1932.0 | 0.431  | 0.322                              | 294.1 | 360.2 | 398.3 | 506.7  | 578.3  | 726.4    | 893.9  | 992.0  | 1170.2 | 1243.8 | 1389.9 |
| 6                        | -0.673                               | 0.282 | 519.0  | 567.9  | 596.9  | 684.6  | 747.5  | 894.2    | 1096.3 | 1238.7 | 1560.5 | 1725.0 | 2128.1 | 0.282  | 0.34                               | 310.2 | 374.9 | 412.9 | 523.4  | 598.5  | 758.4    | 947.0  | 1061.0 | 1274.3 | 1364.8 | 1548.1 |
| 6.5                      | -0.615                               | 0.296 | 540.1  | 594.1  | 626.4  | 724.1  | 794.4  | 959.1    | 1187.0 | 1347.8 | 1711.4 | 1897.0 | 2350.4 | 0.149  | 0.356                              | 338.7 | 405.0 | 444.3 | 561.1  | 642.2  | 820.2    | 1038.6 | 1174.9 | 1438.4 | 1553.3 | 1791.7 |
| 7                        | -0.562                               | 0.31  | 560.7  | 620.4  | 656.2  | 764.8  | 843.3  | 1027.8   | 1284.2 | 1465.5 | 1875.6 | 2084.7 | 2594.1 | 0.036  | 0.371                              | 374.5 | 444.0 | 485.7 | 611.2  | 700.2  | 900.4    | 1155.3 | 1319.4 | 1647.2 | 1794.3 | 2107.5 |
| 7.5                      | -0.512                               | 0.324 | 581.8  | 647.5  | 687.0  | 807.2  | 894.5  | 1100.3   | 1387.1 | 1590.2 | 2049.4 | 2283.1 | 2849.9 | -0.053 | 0.385                              | 413.9 | 487.8 | 532.5 | 668.7  | 766.7  | 992.1    | 1288.2 | 1484.3 | 1888.0 | 2074.4 | 2481.2 |
| 8                        | -0.465                               | 0.335 | 605.1  | 677.1  | 720.5  | 853.0  | 949.5  | 1177.4   | 1495.3 | 1720.3 | 2227.5 | 2484.5 | 3104.1 | -0.117 | 0.396                              | 454.4 | 533.7 | 581.9 | 730.2  | 838.3  | 1090.7   | 1431.1 | 1661.7 | 2149.0 | 2379.3 | 2893.6 |
| 8.5                      | -0.421                               | 0.344 | 633.9  | 712.9  | 760.6  | 906.3  | 1012.6 | 1263.6   | 1613.1 | 1859.6 | 2412.1 | 2690.1 | 3354.5 | -0.16  | 0.406                              | 494.6 | 580.0 | 632.2 | 793.7  | 912.4  | 1193.2   | 1579.3 | 1845.6 | 2420.1 | 2696.9 | 3326.6 |
| 9                        | -0.38                                | 0.35  | 671.2  | 758.1  | 810.5  | 971.1  | 1088.0 | 1363.8   | 1746.1 | 2014.2 | 2610.0 | 2906.9 | 3609.2 | -0.188 | 0.415                              | 532.4 | 624.2 | 680.3 | 855.2  | 984.6  | 1293.5   | 1724.6 | 2025.9 | 2686.2 | 3009.1 | 3754.3 |
| 9.5                      | -0.341                               | 0.353 | 717.9  | 813.8  | 871.7  | 1048.7 | 1177.4 | 1479.9   | 1896.6 | 2186.6 | 2824.3 | 3138.8 | 3873.6 | -0.204 | 0.423                              | 567.3 | 665.4 | 725.5 | 913.6  | 1053.5 | 1389.8   | 1864.0 | 2198.6 | 2940.1 | 3306.7 | 4161.4 |
| 10                       | -0.304                               | 0.353 | 773.3  | 879.3  | 943.1  | 1138.1 | 1279.5 | 1610.4   | 2062.3 | 2374.0 | 3051.7 | 3382.0 | 4144.4 | -0.211 | 0.429                              | 598.8 | 703.0 | 767.1 | 968.1  | 1118.1 | 1480.4   | 1995.0 | 2360.4 | 3176.4 | 3582.6 | 4535.8 |
| 10.5                     | -0.268                               | 0.352 | 836.2  | 953.0  | 1023.2 | 1237.3 | 1392.0 | 1752.0   | 2238.6 | 2571.1 | 3285.1 | 3628.9 | 4412.7 | -0.212 | 0.434                              | 625.5 | 735.6 | 803.3 | 1016.3 | 1175.6 | 1561.7   | 2112.6 | 2505.2 | 3385.6 | 3825.4 | 4861.4 |
| 11                       | -0.235                               | 0.348 | 907.5  | 1036.0 | 1113.2 | 1347.5 | 1516.1 | 1905.7   | 2426.7 | 2779.0 | 3526.0 | 3881.4 | 4681.7 | -0.206 | 0.438                              | 645.2 | 760.2 | 831.1 | 1054.4 | 1221.6 | 1627.7   | 2208.3 | 2622.8 | 3553.2 | 4018.5 | 5115.0 |
| 11.5                     | -0.203                               | 0.343 | 990.2  | 1131.6 | 1216.3 | 1472.5 | 1655.9 | 2076.6   | 2632.6 | 3004.7 | 3783.5 | 4149.6 | 4964.3 | -0.196 | 0.442                              | 657.2 | 776.4 | 849.9 | 1081.5 | 1255.2 | 1677.1   | 2280.4 | 2710.7 | 3675.6 | 4157.4 | 5290.5 |
| 12                       | -0.172                               | 0.337 | 1084.2 | 1239.7 | 1332.6 | 1612.2 | 1811.2 | 2264.3   | 2855.9 | 3247.6 | 4057.3 | 4433.4 | 5261.4 | -0.182 | 0.445                              | 662.8 | 785.3 | 860.9 | 1099.2 | 1278.0 | 1712.2   | 2331.8 | 2772.7 | 3758.0 | 4248.1 | 5396.2 |
| 12.5                     | -0.142                               | 0.331 | 1187.3 | 1357.6 | 1459.0 | 1763.0 | 1978.0 | 2463.7   | 3090.4 | 3500.8 | 4339.3 | 4724.5 | 5563.7 | -0.164 | 0.448                              | 663.9 | 789.2 | 866.6 | 1110.7 | 1293.8 | 1737.6   | 2369.0 | 2816.6 | 3811.7 | 4304.1 | 5451.2 |
| 13                       | -0.114                               | 0.324 | 1293.7 | 1479.0 | 1588.9 | 1916.8 | 2147.3 | 2663.9   | 3322.7 | 3749.8 | 4612.6 | 5004.9 | 5851.4 | -0.144 | 0.45                               | 666.9 | 790.9 | 870.0 | 1119.4 | 1306.3 | 1758.7   | 2399.3 | 2851.4 | 3849.9 | 4340.8 | 5476.8 |
| 13.5                     | -0.086                               | 0.317 | 1398.0 | 1597.4 | 1715.4 | 2065.6 | 2310.2 | 2854.5   | 3540.9 | 3981.6 | 4862.7 | 5259.6 | 6108.5 | -0.122 | 0.452                              | 661.0 | 791.8 | 872.7 | 1127.6 | 1318.4 | 1779.0   | 2427.9 | 2883.2 | 3881.6 | 4368.9 | 5488.4 |
| 14                       | -0.06                                | 0.31  | 1495.2 | 1707.6 | 1832.8 | 2202.8 | 2459.8 | 3027.4   | 3735.8 | 4186.6 | 5079.4 | 5478.0 | 6324.2 | -0.099 | 0.454                              | 659.1 | 793.0 | 875.8 | 1136.6 | 1331.5 | 1800.6   | 2457.7 | 2915.8 | 3912.5 | 4395.3 | 5495.8 |
| 14.5                     | -0.035                               | 0.303 | 1582.0 | 1805.8 | 1937.3 | 2324.2 | 2591.5 | 3177.8   | 3902.4 | 4359.8 | 5257.8 | 5675.7 | 6494.4 | -0.074 | 0.456                              | 656.7 | 795.0 | 879.9 | 1147.2 | 1346.7 | 1825.1   | 2490.8 | 2951.9 | 3946.8 | 4428.8 | 5505.9 |
| 15                       | -0.01                                | 0.298 | 1656.6 | 1890.1 | 2026.9 | 2427.6 | 2703.1 | 3303.7   | 4039.3 | 4500.2 | 5398.0 | 5793.0 | 6620.4 | -0.049 | 0.457                              | 656.8 | 798.0 | 885.2 | 1159.8 | 1364.3 | 1852.9   | 2528.0 | 2992.5 | 3986.0 | 4459.6 | 5521.8 |
| 15.5                     | 0.014                                | 0.293 | 1717.9 | 1959.3 | 2100.4 | 2512.2 | 2793.8 | 3404.4   | 4146.1 | 4607.7 | 5500.5 | 5890.8 | 6704.0 | -0.022 | 0.459                              | 656.5 | 801.9 | 891.8 | 1174.3 | 1384.3 | 1884.1   | 2569.7 | 3038.0 | 4031.2 | 4500.7 | 5545.6 |
| 16                       | 0.037                                | 0.288 | 1765.7 | 2013.4 | 2157.8 | 2577.6 | 2863.5 | 3480.1   | 4223.5 | 4683.3 | 5566.8 | 5950.9 | 6747.1 | 0.004  | 0.46                               | 656.7 | 806.7 | 899.5 | 1190.7 | 1406.7 | 1918.6   | 2615.7 | 3088.5 | 4082.6 | 4548.7 | 5578.3 |
| 16.5                     | 0.059                                | 0.284 | 1800.3 | 2052.6 | 2199.3 | 2624.5 | 2912.9 | 3531.8   | 4272.8 | 4728.5 | 5599.2 | 5975.7 | 6752.7 | 0.031  | 0.461                              | 657.3 | 812.2 | 908.1 | 1208.7 | 1431.1 | 1956.1   | 2665.7 | 3143.5 | 4139.8 | 4603.4 | 5619.7 |
| 17                       | 0.08                                 | 0.28  | 1822.7 | 2078.1 | 2226.2 | 2654.3 | 2943.6 | 3561.4   | 4296.5 | 4746.2 | 5600.7 | 5968.5 | 6724.3 | 0.057  | 0.462                              | 658.0 | 818.3 | 917.4 | 1227.9 | 1457.2 | 1995.9   | 2718.8 | 3202.3 | 4202.2 | 4663.9 | 5669.4 |
| 17.5                     | 0.101                                | 0.277 | 1834.4 | 2091.4 | 2240.3 | 2669.0 | 2957.7 | 3571.5   | 4297.5 | 4739.4 | 5575.0 | 5933.2 | 6666.3 | 0.082  | 0.464                              | 658.9 | 824.7 | 927.3 | 1248.2 | 1484.5 | 2037.6   | 2774.6 | 3264.2 | 4262.0 | 4729.8 | 5726.8 |
| 18                       | 0.122                                | 0.274 | 1837.8 | 2095.4 | 2244.3 | 2671.8 | 2958.8 | 3566.4   | 4281.0 | 4714.0 | 5529.0 | 5876.8 | 6586.4 | 0.106  | 0.465                              | 659.8 | 831.3 | 937.4 | 1269.0 | 1512.7 | 2080.7   | 2832.2 | 3328.3 | 4339.3 | 4799.9 | 5790.3 |

Supplementary Table 33. Smoothed percentiles for total FM% by DXA for female and male 5 to 18 years.

| DXA Total body fat percentage (%) |                                      |       |       |       |       |       |       |          |       |       |       |       |       |        |                                    |       |       |       |       |       |          |       |       |       |       |       |
|-----------------------------------|--------------------------------------|-------|-------|-------|-------|-------|-------|----------|-------|-------|-------|-------|-------|--------|------------------------------------|-------|-------|-------|-------|-------|----------|-------|-------|-------|-------|-------|
| Age (years)                       | Female LMS parameters and percentile |       |       |       |       |       |       |          |       |       |       |       |       |        | Male LMS parameters and percentile |       |       |       |       |       |          |       |       |       |       |       |
|                                   | L                                    | S     | 1th   | 3th   | 5th   | 15th  | 25th  | 50th (M) | 75th  | 85th  | 95th  | 97th  | 99th  | L      | S                                  | 1th   | 3th   | 5th   | 15th  | 25th  | 50th (M) | 75th  | 85th  | 95th  | 97th  | 99th  |
| 5                                 | -0.936                               | 0.149 | 20.78 | 21.87 | 22.50 | 24.29 | 25.49 | 28.07    | 31.20 | 33.18 | 37.11 | 38.88 | 42.73 | 0.153  | 0.171                              | 17.52 | 18.70 | 19.39 | 21.37 | 22.74 | 25.78    | 29.15 | 30.94 | 33.87 | 35.00 | 37.11 |
| 5.5                               | -0.766                               | 0.153 | 20.83 | 22.00 | 22.67 | 24.57 | 25.85 | 28.55    | 31.81 | 33.83 | 37.80 | 39.57 | 43.33 | 0.079  | 0.179                              | 16.60 | 17.71 | 18.35 | 20.26 | 21.60 | 24.64    | 28.07 | 29.88 | 32.86 | 34.00 | 36.15 |
| 6                                 | -0.61                                | 0.159 | 20.79 | 22.05 | 22.77 | 24.80 | 26.15 | 29.00    | 32.40 | 34.49 | 38.54 | 40.32 | 44.07 | 0.012  | 0.186                              | 16.36 | 17.45 | 18.09 | 19.99 | 21.36 | 24.50    | 28.10 | 30.01 | 33.15 | 34.35 | 36.61 |
| 6.5                               | -0.467                               | 0.166 | 20.64 | 22.00 | 22.77 | 24.94 | 26.39 | 29.43    | 33.01 | 35.20 | 39.39 | 41.21 | 45.02 | -0.044 | 0.194                              | 16.52 | 17.61 | 18.25 | 20.20 | 21.62 | 24.94    | 28.79 | 30.85 | 34.21 | 35.50 | 37.93 |
| 7                                 | -0.335                               | 0.174 | 20.39 | 21.85 | 22.68 | 25.02 | 26.57 | 29.82    | 33.62 | 35.93 | 40.31 | 42.21 | 46.11 | -0.09  | 0.2                                | 16.98 | 18.10 | 18.76 | 20.78 | 22.28 | 25.84    | 30.03 | 32.26 | 35.93 | 37.33 | 39.97 |
| 7.5                               | -0.211                               | 0.184 | 20.06 | 21.64 | 22.53 | 25.06 | 26.72 | 30.19    | 34.23 | 36.66 | 41.25 | 43.21 | 47.24 | -0.126 | 0.207                              | 17.51 | 18.66 | 19.34 | 21.46 | 23.04 | 26.86    | 31.41 | 33.84 | 37.83 | 39.35 | 42.22 |
| 8                                 | -0.096                               | 0.192 | 19.72 | 21.42 | 22.38 | 25.08 | 26.86 | 30.55    | 34.80 | 37.35 | 42.10 | 44.12 | 48.23 | -0.151 | 0.213                              | 17.87 | 19.04 | 19.74 | 21.93 | 23.59 | 27.64    | 32.51 | 35.12 | 39.39 | 41.02 | 44.09 |
| 8.5                               | 0.012                                | 0.199 | 19.42 | 21.23 | 22.26 | 25.13 | 27.01 | 30.88    | 35.31 | 37.94 | 42.80 | 44.84 | 48.97 | -0.167 | 0.219                              | 18.03 | 19.21 | 19.93 | 22.17 | 23.88 | 28.13    | 33.27 | 36.03 | 40.53 | 42.25 | 45.48 |
| 9                                 | 0.114                                | 0.203 | 19.20 | 21.12 | 22.20 | 25.22 | 27.18 | 31.20    | 35.75 | 38.42 | 43.31 | 45.35 | 49.43 | -0.177 | 0.225                              | 18.07 | 19.27 | 19.99 | 22.28 | 24.04 | 28.44    | 33.83 | 36.71 | 41.42 | 43.21 | 46.57 |
| 9.5                               | 0.211                                | 0.205 | 19.07 | 21.09 | 22.22 | 25.36 | 27.39 | 31.51    | 36.10 | 38.78 | 43.62 | 45.63 | 49.61 | -0.182 | 0.231                              | 18.08 | 19.29 | 20.02 | 22.35 | 24.15 | 28.71    | 34.33 | 37.33 | 42.23 | 44.09 | 47.57 |
| 10                                | 0.303                                | 0.204 | 19.06 | 21.16 | 22.33 | 25.56 | 27.63 | 31.80    | 36.39 | 39.03 | 43.77 | 45.71 | 49.54 | -0.184 | 0.236                              | 18.14 | 19.36 | 20.10 | 22.47 | 24.32 | 29.05    | 34.91 | 38.04 | 43.13 | 45.05 | 48.66 |
| 10.5                              | 0.39                                 | 0.201 | 19.15 | 21.32 | 22.52 | 25.82 | 27.91 | 32.08    | 36.61 | 39.19 | 43.78 | 45.64 | 49.29 | -0.183 | 0.242                              | 18.12 | 19.35 | 20.10 | 22.51 | 24.41 | 29.28    | 35.34 | 38.59 | 43.85 | 45.83 | 49.53 |
| 11                                | 0.473                                | 0.196 | 19.33 | 21.55 | 22.78 | 26.12 | 28.22 | 32.35    | 36.79 | 39.30 | 43.71 | 45.48 | 48.94 | -0.179 | 0.247                              | 17.86 | 19.08 | 19.83 | 22.24 | 24.15 | 29.10    | 35.29 | 38.60 | 43.94 | 45.95 | 49.69 |
| 11.5                              | 0.552                                | 0.191 | 19.57 | 21.83 | 23.08 | 26.44 | 28.53 | 32.61    | 36.94 | 39.37 | 43.59 | 45.29 | 48.56 | -0.174 | 0.252                              | 17.29 | 18.48 | 19.22 | 21.59 | 23.49 | 28.42    | 34.61 | 37.92 | 43.24 | 45.24 | 48.95 |
| 12                                | 0.628                                |       |       |       |       |       |       |          |       |       |       |       |       |        |                                    |       |       |       |       |       |          |       |       |       |       |       |

Supplementary Table 34. Smoothed percentiles for truncal fat percentage by DXA for female and male 5 to 18 years.

| Age (years) | DXA Truncal fat percentage (%)       |       |       |       |       |       |       |          |       |       |       |       |       |                                    |       |       |       |       |       |       |          |       |       |       |       |       |
|-------------|--------------------------------------|-------|-------|-------|-------|-------|-------|----------|-------|-------|-------|-------|-------|------------------------------------|-------|-------|-------|-------|-------|-------|----------|-------|-------|-------|-------|-------|
|             | Female LMS parameters and percentile |       |       |       |       |       |       |          |       |       |       |       |       | Male LMS parameters and percentile |       |       |       |       |       |       |          |       |       |       |       |       |
|             | L                                    | S     | 1th   | 3th   | 5th   | 15th  | 25th  | 50th (M) | 75th  | 85th  | 95th  | 97th  | 99th  | L                                  | S     | 1th   | 3th   | 5th   | 15th  | 25th  | 50th (M) | 75th  | 85th  | 95th  | 97th  | 99th  |
| 5           | -0.15                                | 0.246 | 14.07 | 15.57 | 16.45 | 18.97 | 20.67 | 24.35    | 28.80 | 31.57 | 36.95 | 39.31 | 44.27 | 0.098                              | 0.28  | 11.04 | 12.37 | 13.15 | 15.50 | 17.17 | 21.01    | 25.60 | 28.22 | 32.87 | 34.75 | 38.46 |
| 5.5         | -0.084                               | 0.245 | 14.38 | 15.97 | 16.88 | 19.52 | 21.30 | 25.09    | 29.64 | 32.44 | 37.81 | 40.15 | 45.00 | 0.111                              | 0.29  | 10.36 | 11.61 | 12.35 | 14.60 | 16.23 | 20.07    | 24.68 | 27.29 | 31.81 | 33.62 | 37.15 |
| 6           | -0.025                               | 0.248 | 14.56 | 16.23 | 17.20 | 19.97 | 21.83 | 25.79    | 30.49 | 33.36 | 38.84 | 41.20 | 46.07 | 0.122                              | 0.299 | 10.18 | 11.40 | 12.13 | 14.39 | 16.06 | 20.05    | 24.89 | 27.58 | 32.19 | 34.01 | 37.52 |
| 6.5         | 0.029                                | 0.256 | 14.52 | 16.30 | 17.33 | 20.27 | 22.25 | 26.45    | 31.41 | 34.44 | 40.18 | 42.64 | 47.70 | 0.133                              | 0.309 | 10.33 | 11.57 | 12.32 | 14.66 | 16.42 | 20.70    | 25.92 | 28.79 | 33.63 | 35.52 | 39.12 |
| 7           | 0.078                                | 0.268 | 14.28 | 16.18 | 17.28 | 20.44 | 22.56 | 27.07    | 32.40 | 35.65 | 41.78 | 44.41 | 49.80 | 0.142                              | 0.317 | 10.70 | 11.99 | 12.78 | 15.25 | 17.14 | 21.81    | 27.52 | 30.64 | 35.82 | 37.83 | 41.61 |
| 7.5         | 0.124                                | 0.283 | 13.94 | 15.96 | 17.14 | 20.53 | 22.81 | 27.67    | 33.40 | 36.89 | 43.48 | 46.30 | 52.06 | 0.151                              | 0.326 | 11.13 | 12.47 | 13.30 | 15.92 | 17.94 | 23.03    | 29.29 | 32.68 | 38.24 | 40.36 | 44.35 |
| 8           | 0.168                                | 0.295 | 13.61 | 15.76 | 17.01 | 20.62 | 23.06 | 28.23    | 34.35 | 38.05 | 45.04 | 48.02 | 54.09 | 0.16                               | 0.333 | 11.47 | 12.87 | 13.72 | 16.47 | 18.62 | 24.10    | 30.88 | 34.51 | 40.41 | 42.64 | 46.80 |
| 8.5         | 0.21                                 | 0.303 | 13.41 | 15.67 | 16.99 | 20.79 | 23.35 | 28.78    | 35.16 | 39.02 | 46.25 | 49.32 | 55.56 | 0.168                              | 0.341 | 11.74 | 13.17 | 14.05 | 16.91 | 19.17 | 25.00    | 32.24 | 36.10 | 42.29 | 44.61 | 48.90 |
| 9           | 0.253                                | 0.306 | 13.38 | 15.75 | 17.12 | 21.06 | 23.71 | 29.30    | 35.82 | 39.74 | 47.03 | 50.11 | 56.34 | 0.176                              | 0.347 | 11.96 | 13.41 | 14.32 | 17.27 | 19.64 | 25.79    | 33.47 | 37.52 | 43.98 | 46.37 | 50.78 |
| 9.5         | 0.295                                | 0.302 | 13.54 | 15.99 | 17.40 | 21.45 | 24.15 | 29.80    | 36.33 | 40.22 | 47.41 | 50.42 | 56.48 | 0.183                              | 0.353 | 12.13 | 13.61 | 14.53 | 17.56 | 20.01 | 26.47    | 34.54 | 38.78 | 45.46 | 47.91 | 52.41 |
| 10          | 0.34                                 | 0.295 | 13.87 | 16.38 | 17.83 | 21.93 | 24.65 | 30.29    | 36.71 | 40.51 | 47.45 | 50.34 | 56.11 | 0.189                              | 0.359 | 12.24 | 13.73 | 14.67 | 17.76 | 20.29 | 27.01    | 35.42 | 39.81 | 46.68 | 49.18 | 53.74 |
| 10.5        | 0.386                                | 0.284 | 14.33 | 16.90 | 18.36 | 22.49 | 25.20 | 30.75    | 37.00 | 40.65 | 47.27 | 50.00 | 55.43 | 0.196                              | 0.364 | 12.23 | 13.72 | 14.66 | 17.79 | 20.36 | 27.26    | 35.92 | 40.42 | 47.38 | 49.91 | 54.47 |
| 11          | 0.434                                | 0.272 | 14.88 | 17.49 | 18.96 | 23.09 | 25.77 | 31.20    | 37.24 | 40.72 | 46.99 | 49.55 | 54.61 | 0.202                              | 0.369 | 12.04 | 13.51 | 14.43 | 17.53 | 20.11 | 27.07    | 35.82 | 40.35 | 47.30 | 49.80 | 54.29 |
| 11.5        | 0.485                                | 0.26  | 15.45 | 18.10 | 19.58 | 23.70 | 26.34 | 31.64    | 37.45 | 40.77 | 46.69 | 49.10 | 53.81 | 0.208                              | 0.373 | 11.67 | 13.09 | 13.99 | 17.02 | 19.56 | 26.46    | 35.15 | 39.63 | 46.44 | 48.87 | 53.23 |
| 12          | 0.537                                | 0.249 | 16.03 | 18.70 | 20.20 | 24.29 | 26.89 | 32.07    | 37.66 | 40.83 | 46.43 | 48.69 | 53.09 | 0.213                              | 0.376 | 11.19 | 12.54 | 13.41 | 16.33 | 18.80 | 25.54    | 34.06 | 38.42 | 45.01 | 47.35 | 51.51 |
| 12.5        | 0.591                                | 0.239 | 16.58 | 19.29 | 20.79 | 24.86 | 27.43 | 32.48    | 37.88 | 40.91 | 46.22 | 48.59 | 52.49 | 0.219                              | 0.38  | 10.67 | 11.96 | 12.78 | 15.58 | 17.96 | 24.50    | 32.78 | 37.00 | 43.33 | 45.56 | 49.51 |
| 13          | 0.646                                | 0.229 | 17.10 | 19.83 | 21.34 | 25.40 | 27.94 | 32.88    | 38.10 | 41.02 | 46.08 | 48.11 | 52.00 | 0.224                              | 0.383 | 10.17 | 11.39 | 12.17 | 14.86 | 17.15 | 23.49    | 31.50 | 35.58 | 41.64 | 43.76 | 47.51 |
| 13.5        | 0.701                                | 0.221 | 17.57 | 20.34 | 21.85 | 25.91 | 28.42 | 33.27    | 38.35 | 41.16 | 46.01 | 47.94 | 51.64 | 0.229                              | 0.385 | 9.74  | 10.90 | 11.65 | 14.22 | 16.44 | 22.58    | 30.36 | 34.30 | 40.12 | 42.15 | 45.70 |
| 14          | 0.757                                | 0.214 | 17.99 | 20.80 | 22.33 | 26.38 | 28.87 | 33.65    | 38.60 | 41.33 | 46.00 | 47.85 | 51.38 | 0.234                              | 0.387 | 9.38  | 10.50 | 11.22 | 13.70 | 15.85 | 21.83    | 29.42 | 33.24 | 38.85 | 40.79 | 44.19 |
| 14.5        | 0.813                                | 0.209 | 18.35 | 21.21 | 22.75 | 26.82 | 29.30 | 34.02    | 38.87 | 41.52 | 46.05 | 47.83 | 51.22 | 0.238                              | 0.388 | 9.11  | 10.19 | 10.88 | 13.29 | 15.39 | 21.25    | 28.68 | 32.41 | 37.85 | 39.72 | 42.98 |
| 15          | 0.869                                | 0.204 | 18.67 | 21.58 | 23.14 | 27.23 | 29.70 | 34.39    | 39.15 | 41.74 | 46.15 | 47.87 | 51.14 | 0.243                              | 0.39  | 8.91  | 9.96  | 10.63 | 12.98 | 15.04 | 20.82    | 28.14 | 31.80 | 37.10 | 38.92 | 42.06 |
| 15.5        | 0.924                                | 0.2   | 18.93 | 21.90 | 23.48 | 27.61 | 30.08 | 34.74    | 39.44 | 41.99 | 46.29 | 47.96 | 51.14 | 0.247                              | 0.391 | 8.78  | 9.80  | 10.46 | 12.77 | 14.81 | 20.53    | 27.78 | 31.39 | 36.59 | 38.36 | 41.41 |
| 16          | 0.978                                | 0.197 | 19.14 | 22.17 | 23.79 | 27.95 | 30.44 | 35.09    | 39.74 | 42.25 | 46.47 | 48.11 | 51.20 | 0.251                              | 0.391 | 8.70  | 9.70  | 10.35 | 12.64 | 14.66 | 20.36    | 27.57 | 31.16 | 36.28 | 38.02 | 41.00 |
| 16.5        | 1.032                                | 0.194 | 19.29 | 22.41 | 24.05 | 28.27 | 30.78 | 35.42    | 40.05 | 42.53 | 46.68 | 48.29 | 51.32 | 0.255                              | 0.392 | 8.68  | 9.67  | 10.31 | 12.58 | 14.60 | 20.30    | 27.51 | 31.09 | 36.16 | 37.87 | 40.80 |
| 17          | 1.085                                | 0.192 | 19.41 | 22.61 | 24.29 | 28.57 | 31.10 | 35.76    | 40.36 | 42.82 | 46.92 | 48.50 | 51.47 | 0.259                              | 0.392 | 8.69  | 9.68  | 10.32 | 12.59 | 14.61 | 20.34    | 27.58 | 31.15 | 36.21 | 37.90 | 40.79 |
| 17.5        | 1.137                                | 0.19  | 19.48 | 22.78 | 24.50 | 28.85 | 31.40 | 36.08    | 40.68 | 43.11 | 47.17 | 48.73 | 51.65 | 0.263                              | 0.392 | 8.75  | 9.73  | 10.37 | 12.65 | 14.68 | 20.46    | 27.76 | 31.36 | 36.41 | 38.09 | 40.96 |
| 18          | 1.188                                | 0.189 | 19.54 | 22.93 | 24.69 | 29.12 | 31.70 | 36.40    | 40.99 | 43.41 | 47.43 | 48.97 | 51.85 | 0.267                              | 0.392 | 8.84  | 9.82  | 10.46 | 12.76 | 14.82 | 20.67    | 28.06 | 31.69 | 36.76 | 38.44 | 41.30 |

Supplementary Table 35. Smoothed percentiles for total lean mass for female and male 5 to 18 years.

| Age  | DXA Total Lean Mass (kg)                 |       |       |       |       |       |       |          |       |       |       |       |       |                                        |       |       |       |       |       |       |          |       |       |       |       |       |
|------|------------------------------------------|-------|-------|-------|-------|-------|-------|----------|-------|-------|-------|-------|-------|----------------------------------------|-------|-------|-------|-------|-------|-------|----------|-------|-------|-------|-------|-------|
|      | Female LMS parameters modeled percentile |       |       |       |       |       |       |          |       |       |       |       |       | Male LMS parameters modeled percentile |       |       |       |       |       |       |          |       |       |       |       |       |
|      | L                                        | S     | 1th   | 3th   | 5th   | 15th  | 25th  | 50th (M) | 75th  | 85th  | 95th  | 97th  | 99th  | L                                      | S     | 1th   | 3th   | 5th   | 15th  | 25th  | 50th (M) | 75th  | 85th  | 95th  | 97th  | 99th  |
| 5    | -1.136                                   | 0.120 | 9.09  | 9.49  | 9.71  | 10.35 | 10.77 | 11.67    | 12.75 | 13.42 | 14.74 | 15.33 | 16.59 | 1.648                                  | 0.122 | 8.88  | 9.78  | 10.24 | 11.35 | 11.96 | 13.03    | 14.07 | 14.63 | 15.59 | 15.96 | 16.67 |
| 5.5  | -1.064                                   | 0.114 | 9.93  | 10.34 | 10.57 | 11.22 | 11.64 | 12.54    | 13.58 | 14.22 | 15.45 | 15.99 | 17.12 | 1.161                                  | 0.122 | 9.79  | 10.57 | 10.98 | 12.02 | 12.62 | 13.73    | 14.83 | 15.44 | 16.49 | 16.91 | 17.70 |
| 6    | -0.999                                   | 0.112 | 10.62 | 11.04 | 11.28 | 11.95 | 12.39 | 13.29    | 14.34 | 14.98 | 16.19 | 16.71 | 17.79 | 0.691                                  | 0.123 | 10.60 | 11.31 | 11.70 | 12.71 | 13.33 | 14.50    | 15.72 | 16.40 | 17.59 | 18.06 | 18.98 |
| 6.5  | -0.938                                   | 0.114 | 11.09 | 11.54 | 11.80 | 12.52 | 12.99 | 13.96    | 15.09 | 15.77 | 17.06 | 17.62 | 18.78 | 0.219                                  | 0.125 | 11.38 | 12.06 | 12.43 | 13.43 | 14.06 | 15.31    | 16.65 | 17.41 | 18.75 | 19.30 | 20.36 |
| 7    | -0.882                                   | 0.120 | 11.41 | 11.92 | 12.21 | 13.01 | 13.54 | 14.64    | 15.92 | 16.70 | 18.18 | 18.82 | 20.17 | -0.220                                 | 0.123 | 12.22 | 12.85 | 13.21 | 14.18 | 14.81 | 16.10    | 17.53 | 18.35 | 19.82 | 20.43 | 21.63 |
| 7.5  | -0.830                                   | 0.128 | 11.76 | 12.32 | 12.64 | 13.54 | 14.13 | 15.38    | 16.84 | 17.73 | 19.45 | 20.20 | 21.77 | -0.574                                 | 0.121 | 13.01 | 13.62 | 13.96 | 14.92 | 15.55 | 16.87    | 18.37 | 19.24 | 20.81 | 21.46 | 22.77 |
| 8    | -0.781                                   | 0.134 | 12.23 | 12.84 | 13.19 | 14.18 | 14.83 | 16.20    | 17.81 | 18.80 | 20.70 | 21.53 | 23.28 | -0.830                                 | 0.122 | 13.72 | 14.33 | 14.67 | 15.64 | 16.30 | 17.69    | 19.29 | 20.23 | 21.93 | 22.64 | 24.08 |
| 8.5  | -0.735                                   | 0.139 | 12.83 | 13.50 | 13.87 | 14.94 | 15.64 | 17.11    | 18.85 | 19.91 | 21.96 | 22.85 | 24.73 | -0.973                                 | 0.126 | 14.34 | 14.96 | 15.32 | 16.35 | 17.04 | 18.56    | 20.33 | 21.37 | 23.27 | 24.07 | 25.68 |
| 9    | -0.692                                   | 0.145 | 13.50 | 14.22 | 14.63 | 15.78 | 16.54 | 18.14    | 20.02 | 21.17 | 23.39 | 24.35 | 26.37 | -0.991                                 | 0.133 | 14.90 | 15.57 | 15.96 | 17.07 | 17.83 | 19.51    | 21.49 | 22.65 | 24.77 | 25.66 | 27.46 |
| 9.5  | -0.651                                   | 0.151 | 14.17 | 14.96 | 15.41 | 16.68 | 17.52 | 19.29    | 21.38 | 22.67 | 25.13 | 26.22 | 28.48 | -0.888                                 | 0.139 | 15.48 | 16.21 | 16.63 | 17.85 | 18.69 | 20.56    | 22.77 | 24.05 | 26.36 | 27.33 | 29.27 |
| 10   | -0.613                                   | 0.159 | 14.82 | 15.70 | 16.20 | 17.62 | 18.57 | 20.57    | 22.94 | 24.41 | 27.24 | 28.49 | 31.11 | -0.695                                 | 0.145 | 16.11 | 16.92 | 17.38 | 18.73 | 19.67 | 21.75    | 24.19 | 25.59 | 28.07 | 29.08 | 31.10 |
| 10.5 | -0.576                                   | 0.165 | 15.48 | 16.46 | 17.02 | 18.62 | 19.68 | 21.95    | 24.66 | 26.34 | 29.62 | 31.06 | 34.12 | -0.444                                 | 0.152 | 16.77 | 17.68 | 18.20 | 19.72 | 20.77 | 23.11    | 25.80 | 27.31 | 29.94 | 31.00 | 33.07 |
| 11   | -0.541                                   | 0.170 | 16.22 | 17.31 | 17.93 | 19.69 | 20.88 | 23.41    | 26.45 | 28.34 | 32.04 | 33.68 | 37.16 | -0.166                                 | 0.158 | 17.46 | 18.49 | 19.09 | 20.82 | 22.01 | 24.64    | 27.62 | 29.26 | 32.04 | 33.14 | 35.25 |
| 11.5 | -0.507                                   | 0.170 | 17.13 | 18.30 | 18.97 | 20.88 | 22.17 | 24.90    | 28.18 | 30.22 | 34.20 | 35.97 | 39.70 | 0.107                                  | 0.164 | 18.22 | 19.40 | 20.08 | 22.06 | 23.41 | 26.37    | 29.67 | 31.43 | 34.38 | 35.52 | 37.68 |
| 12   | -0.475                                   | 0.167 | 18.22 | 19.46 | 20.17 | 22.18 | 23.52 | 26.36    | 29.75 | 31.84 | 35.90 | 37.68 | 41.43 | 0.348                                  | 0.167 | 19.12 | 20.48 | 21.25 | 23.48 | 25.00 | 28.31    | 31.92 | 33.81 | 36.91 | 38.09 | 40.31 |
| 12.5 | -0.444                                   | 0.161 | 19.43 | 20.71 | 21.44 | 23.49 | 24.86 | 27.73    | 31.11 | 33.17 | 37.13 | 38.85 | 42.44 | 0.540                                  | 0.168 | 20.30 | 21.81 | 22.68 | 25.1  |       |          |       |       |       |       |       |

Supplementary Table 36. Smoothed percentiles for lean mass index (LMI) for female and male 5 to 18 years.

| Age (years) | DXA Lean mass index (kg/m <sup>2</sup> ) |       |       |       |       |       |       |          |       |       |       |                                    |       |        |       |       |       |       |       |       |          |       |       |       |       |       |
|-------------|------------------------------------------|-------|-------|-------|-------|-------|-------|----------|-------|-------|-------|------------------------------------|-------|--------|-------|-------|-------|-------|-------|-------|----------|-------|-------|-------|-------|-------|
|             | Female LMS parameters and percentile     |       |       |       |       |       |       |          |       |       |       | Male LMS parameters and percentile |       |        |       |       |       |       |       |       |          |       |       |       |       |       |
|             | L                                        | S     | 1th   | 3th   | 5th   | 15th  | 25th  | 50th (M) | 75th  | 85th  | 95th  | 97th                               | 99th  | L      | S     | 1th   | 3th   | 5th   | 15th  | 25th  | 50th (M) | 75th  | 85th  | 95th  | 97th  | 99th  |
| 5           | -2.364                                   | 0.061 | 9.08  | 9.21  | 9.29  | 9.52  | 9.70  | 10.14    | 10.65 | 10.91 | 11.33 | 11.48                              | 11.76 | -1.926 | 0.058 | 9.58  | 9.79  | 9.90  | 10.20 | 10.40 | 10.80    | 11.24 | 11.50 | 11.99 | 12.19 | 12.60 |
| 5.5         | -2.27                                    | 0.062 | 9.27  | 9.40  | 9.48  | 9.73  | 9.92  | 10.38    | 10.91 | 11.19 | 11.62 | 11.78                              | 12.08 | -1.773 | 0.06  | 9.65  | 9.86  | 9.98  | 10.31 | 10.52 | 10.94    | 11.41 | 11.69 | 12.20 | 12.42 | 12.86 |
| 6           | -2.185                                   | 0.064 | 9.37  | 9.51  | 9.60  | 9.86  | 10.05 | 10.53    | 11.09 | 11.38 | 11.84 | 12.01                              | 12.33 | -1.634 | 0.063 | 9.69  | 9.91  | 10.04 | 10.38 | 10.60 | 11.05    | 11.55 | 11.84 | 12.39 | 12.61 | 13.08 |
| 6.5         | -2.107                                   | 0.067 | 9.36  | 9.51  | 9.61  | 9.88  | 10.09 | 10.59    | 11.17 | 11.48 | 11.97 | 12.16                              | 12.51 | -1.506 | 0.066 | 9.68  | 9.92  | 10.05 | 10.41 | 10.64 | 11.11    | 11.63 | 11.94 | 12.51 | 12.75 | 13.23 |
| 7           | -2.035                                   | 0.071 | 9.32  | 9.48  | 9.58  | 9.87  | 10.09 | 10.62    | 11.25 | 11.57 | 12.11 | 12.31                              | 12.70 | -1.387 | 0.069 | 9.64  | 9.89  | 10.03 | 10.40 | 10.65 | 11.13    | 11.68 | 12.00 | 12.59 | 12.83 | 13.33 |
| 7.5         | -1.968                                   | 0.076 | 9.26  | 9.44  | 9.54  | 9.85  | 10.09 | 10.65    | 11.32 | 11.67 | 12.26 | 12.49                              | 12.92 | -1.276 | 0.071 | 9.59  | 9.85  | 9.99  | 10.38 | 10.63 | 11.14    | 11.70 | 12.03 | 12.64 | 12.89 | 13.41 |
| 8           | -1.904                                   | 0.081 | 9.21  | 9.39  | 9.50  | 9.83  | 10.08 | 10.67    | 11.38 | 11.77 | 12.40 | 12.65                              | 13.13 | -1.173 | 0.073 | 9.56  | 9.83  | 9.98  | 10.39 | 10.65 | 11.17    | 11.76 | 12.10 | 12.73 | 12.99 | 13.52 |
| 8.5         | -1.845                                   | 0.085 | 9.17  | 9.36  | 9.48  | 9.83  | 10.09 | 10.72    | 11.46 | 11.87 | 12.56 | 12.83                              | 13.34 | -1.076 | 0.076 | 9.57  | 9.85  | 10.01 | 10.43 | 10.71 | 11.25    | 11.86 | 12.21 | 12.86 | 13.13 | 13.68 |
| 9           | -1.789                                   | 0.089 | 9.17  | 9.37  | 9.49  | 9.86  | 10.14 | 10.79    | 11.58 | 12.01 | 12.75 | 13.04                              | 13.60 | -0.984 | 0.078 | 9.61  | 9.91  | 10.07 | 10.51 | 10.79 | 11.36    | 11.99 | 12.36 | 13.03 | 13.32 | 13.88 |
| 9.5         | -1.737                                   | 0.093 | 9.19  | 9.41  | 9.54  | 9.93  | 10.22 | 10.90    | 11.73 | 12.19 | 12.98 | 13.29                              | 13.90 | -0.897 | 0.08  | 9.67  | 9.98  | 10.15 | 10.61 | 10.90 | 11.49    | 12.15 | 12.53 | 13.23 | 13.52 | 14.10 |
| 10          | -1.686                                   | 0.097 | 9.24  | 9.47  | 9.61  | 10.02 | 10.32 | 11.04    | 11.92 | 12.41 | 13.25 | 13.59                              | 14.25 | -0.815 | 0.082 | 9.75  | 10.07 | 10.25 | 10.73 | 11.04 | 11.65    | 12.34 | 12.73 | 13.45 | 13.75 | 14.36 |
| 10.5        | -1.639                                   | 0.1   | 9.32  | 9.56  | 9.70  | 10.13 | 10.45 | 11.21    | 12.13 | 12.65 | 13.55 | 13.91                              | 14.63 | -0.737 | 0.085 | 9.86  | 10.19 | 10.38 | 10.88 | 11.20 | 11.85    | 12.56 | 12.97 | 13.72 | 14.03 | 14.65 |
| 11          | -1.593                                   | 0.103 | 9.42  | 9.68  | 9.83  | 10.28 | 10.61 | 11.40    | 12.37 | 12.91 | 13.86 | 14.25                              | 15.02 | -0.662 | 0.087 | 9.99  | 10.34 | 10.54 | 11.07 | 11.40 | 12.07    | 12.82 | 13.24 | 14.02 | 14.35 | 14.99 |
| 11.5        | -1.55                                    | 0.105 | 9.58  | 9.84  | 10.00 | 10.47 | 10.81 | 11.63    | 12.63 | 13.19 | 14.18 | 14.58                              | 15.38 | -0.591 | 0.089 | 10.16 | 10.53 | 10.73 | 11.28 | 11.64 | 12.34    | 13.11 | 13.56 | 14.37 | 14.71 | 15.37 |
| 12          | -1.508                                   | 0.105 | 9.77  | 10.05 | 10.21 | 10.69 | 11.05 | 11.88    | 12.89 | 13.47 | 14.47 | 14.89                              | 15.70 | -0.523 | 0.091 | 10.35 | 10.73 | 10.95 | 11.53 | 11.90 | 12.64    | 13.45 | 13.92 | 14.76 | 15.11 | 15.80 |
| 12.5        | -1.469                                   | 0.104 | 9.99  | 10.27 | 10.44 | 10.93 | 11.29 | 12.14    | 13.15 | 13.73 | 14.74 | 15.15                              | 15.97 | -0.458 | 0.093 | 10.56 | 10.97 | 11.19 | 11.81 | 12.19 | 12.97    | 13.82 | 14.30 | 15.18 | 15.55 | 16.27 |
| 13          | -1.43                                    | 0.102 | 10.20 | 10.49 | 10.66 | 11.17 | 11.53 | 12.38    | 13.39 | 13.96 | 14.96 | 15.37                              | 16.17 | -0.395 | 0.094 | 10.79 | 11.22 | 11.46 | 12.11 | 12.51 | 13.33    | 14.21 | 14.72 | 15.64 | 16.02 | 16.77 |
| 13.5        | -1.393                                   | 0.1   | 10.41 | 10.71 | 10.88 | 11.39 | 11.75 | 12.60    | 13.60 | 14.16 | 15.15 | 15.55                              | 16.34 | -0.334 | 0.096 | 11.04 | 11.49 | 11.74 | 12.42 | 12.85 | 13.70    | 14.63 | 15.17 | 16.13 | 16.52 | 17.30 |
| 14          | -1.358                                   | 0.098 | 10.60 | 10.90 | 11.07 | 11.59 | 11.95 | 12.79    | 13.78 | 14.33 | 15.30 | 15.70                              | 16.47 | -0.276 | 0.098 | 11.29 | 11.76 | 12.03 | 12.74 | 13.19 | 14.09    | 15.06 | 15.62 | 16.61 | 17.02 | 17.83 |
| 14.5        | -1.324                                   | 0.096 | 10.76 | 11.06 | 11.24 | 11.76 | 12.12 | 12.95    | 13.93 | 14.48 | 15.44 | 15.82                              | 16.58 | -0.22  | 0.1   | 11.52 | 12.02 | 12.29 | 13.04 | 13.51 | 14.45    | 15.46 | 16.04 | 17.08 | 17.51 | 18.34 |
| 15          | -1.29                                    | 0.095 | 10.89 | 11.20 | 11.38 | 11.90 | 12.26 | 13.09    | 14.07 | 14.61 | 15.55 | 15.93                              | 16.68 | -0.165 | 0.102 | 11.72 | 12.24 | 12.53 | 13.31 | 13.80 | 14.78    | 15.83 | 16.44 | 17.51 | 17.95 | 18.81 |
| 15.5        | -1.258                                   | 0.094 | 10.99 | 11.31 | 11.49 | 12.01 | 12.38 | 13.21    | 14.18 | 14.72 | 15.66 | 16.03                              | 16.78 | -0.113 | 0.103 | 11.88 | 12.43 | 12.73 | 13.55 | 14.06 | 15.07    | 16.16 | 16.79 | 17.89 | 18.35 | 19.23 |
| 16          | -1.227                                   | 0.093 | 11.07 | 11.39 | 11.57 | 12.10 | 12.47 | 13.30    | 14.27 | 14.81 | 15.74 | 16.12                              | 16.87 | -0.062 | 0.105 | 12.02 | 12.59 | 12.90 | 13.74 | 14.28 | 15.32    | 16.45 | 17.09 | 18.23 | 18.70 | 19.61 |
| 16.5        | -1.197                                   | 0.093 | 11.12 | 11.44 | 11.63 | 12.16 | 12.54 | 13.37    | 14.34 | 14.87 | 15.81 | 16.19                              | 16.94 | -0.013 | 0.107 | 12.13 | 12.72 | 13.04 | 13.92 | 14.47 | 15.55    | 16.71 | 17.37 | 18.54 | 19.01 | 19.94 |
| 17          | -1.168                                   | 0.093 | 11.15 | 11.47 | 11.66 | 12.20 | 12.58 | 13.41    | 14.38 | 14.92 | 15.86 | 16.24                              | 16.99 | 0.035  | 0.109 | 12.22 | 12.83 | 13.17 | 14.07 | 14.63 | 15.75    | 16.94 | 17.62 | 18.82 | 19.30 | 20.25 |
| 17.5        | -1.14                                    | 0.093 | 11.15 | 11.48 | 11.67 | 12.22 | 12.59 | 13.43    | 14.40 | 14.94 | 15.88 | 16.27                              | 17.01 | 0.082  | 0.11  | 12.30 | 12.93 | 13.27 | 14.21 | 14.79 | 15.93    | 17.16 | 17.85 | 19.07 | 19.57 | 20.54 |
| 18          | -1.112                                   | 0.094 | 11.14 | 11.47 | 11.66 | 12.21 | 12.59 | 13.43    | 14.40 | 14.94 | 15.88 | 16.27                              | 17.02 | 0.127  | 0.112 | 12.37 | 13.02 | 13.38 | 14.34 | 14.94 | 16.11    | 17.37 | 18.08 | 19.32 | 19.83 | 20.81 |

Supplementary Table 37. Smoothed percentiles for right arm lean mass for female and male 5 to 18 years.

| Age (years) | DXA right arm lean mass (g)          |       |       |       |       |        |        |          |        |        |        |        |                                    |        |       |       |       |       |        |        |          |        |        |        |        |        |
|-------------|--------------------------------------|-------|-------|-------|-------|--------|--------|----------|--------|--------|--------|--------|------------------------------------|--------|-------|-------|-------|-------|--------|--------|----------|--------|--------|--------|--------|--------|
|             | Female LMS parameters and percentile |       |       |       |       |        |        |          |        |        |        |        | Male LMS parameters and percentile |        |       |       |       |       |        |        |          |        |        |        |        |        |
|             | L                                    | S     | 1th   | 3th   | 5th   | 15th   | 25th   | 50th (M) | 75th   | 85th   | 95th   | 97th   | 99th                               | L      | S     | 1th   | 3th   | 5th   | 15th   | 25th   | 50th (M) | 75th   | 85th   | 95th   | 97th   | 99th   |
| 5           | -0.668                               | 0.195 | 313.4 | 335.5 | 348.3 | 385.2  | 410.5  | 465.5    | 534.0  | 578.0  | 667.2  | 708.1  | 797.8                              | -0.067 | 0.151 | 380.5 | 406.5 | 421.0 | 461.0  | 486.7  | 538.7    | 596.8  | 630.7  | 692.3  | 718.0  | 769.1  |
| 5.5         | -0.632                               | 0.161 | 367.8 | 390.3 | 403.1 | 439.5  | 463.7  | 515.2    | 576.8  | 614.9  | 689.0  | 721.8  | 811.0                              | -0.032 | 0.153 | 400.2 | 428.1 | 443.6 | 486.6  | 514.1  | 569.8    | 631.8  | 667.9  | 733.4  | 760.6  | 814.7  |
| 6           | -0.599                               | 0.144 | 412.5 | 435.5 | 448.5 | 485.0  | 509.1  | 559.3    | 617.9  | 653.6  | 721.4  | 750.8  | 891.7                              | 0      | 0.155 | 430.2 | 460.9 | 478.0 | 525.2  | 555.4  | 616.4    | 684.1  | 723.4  | 794.8  | 824.3  | 883.0  |
| 6.5         | -0.569                               | 0.14  | 441.7 | 465.9 | 479.7 | 518.1  | 543.4  | 595.8    | 656.7  | 693.5  | 763.1  | 793.0  | 854.9                              | 0.03   | 0.156 | 462.1 | 495.8 | 514.6 | 566.2  | 599.3  | 666.0    | 739.8  | 782.7  | 860.2  | 892.2  | 955.9  |
| 7           | -0.541                               | 0.147 | 461.0 | 487.6 | 502.6 | 544.9  | 572.7  | 630.6    | 698.1  | 739.0  | 816.7  | 850.2  | 919.6                              | 0.057  | 0.158 | 490.9 | 527.5 | 547.9 | 604.0  | 639.9  | 712.2    | 792.2  | 838.6  | 922.3  | 956.8  | 1025.4 |
| 7.5         | -0.515                               | 0.158 | 476.1 | 505.7 | 522.5 | 569.9  | 601.3  | 667.1    | 744.6  | 791.9  | 882.3  | 921.6  | 1003.5                             | 0.083  | 0.162 | 515.8 | 555.5 | 577.6 | 638.4  | 677.3  | 755.7    | 842.3  | 892.4  | 982.9  | 1020.3 | 1094.3 |
| 8           | -0.49                                | 0.17  | 491.5 | 524.2 | 542.9 | 595.9  | 631.1  | 705.7    | 794.1  | 848.6  | 953.5  | 999.4  | 1095.7                             | 0.106  | 0.166 | 539.2 | 582.3 | 606.3 | 672.5  | 714.8  | 800.1    | 894.5  | 949.1  | 1047.6 | 1088.2 | 1168.7 |
| 8.5         | -0.467                               | 0.18  | 511.1 | 547.0 | 567.6 | 626.2  | 665.3  | 748.5    | 847.9  | 909.3  | 1028.5 | 1080.9 | 1191.2                             | 0.129  | 0.172 | 563.3 | 610.3 | 636.6 | 709.0  | 755.3  | 848.7    | 952.1  | 1012.0 | 1120.0 | 1164.5 | 1252.8 |
| 9           | -0.446                               | 0.188 | 534.9 | 574.4 | 597.1 | 661.8  | 705.3  | 798.0    | 909.4  | 978.6  | 1113.4 | 1173.0 | 1298.7                             | 0.15   | 0.177 | 589.0 | 640.5 | 669.2 | 748.5  | 799.3  | 901.9    | 1015.5 | 1081.3 | 1200.1 | 1249.0 | 1346.1 |
| 9.5         | -0.425                               | 0.198 | 560.8 | 604.5 | 629.7 | 701.9  | 750.5  | 854.9    | 981.2  | 1060.2 | 1214.9 | 1283.6 | 1429.4                             | 0.17   | 0.183 | 616.0 | 672.2 | 703.7 | 790.4  | 846.1  | 958.5    | 1083.1 | 1155.3 | 1285.6 | 1339.4 | 1445.9 |
| 10          | -0.406                               | 0.211 | 587.6 | 636.3 | 664.3 | 745.3  | 800.1  | 918.6    | 1063.2 | 1154.4 | 1334.1 | 1414.5 | 1585.9                             | 0.189  | 0.189 | 644.7 | 706.1 | 740.5 | 835.4  | 896.4  | 1019.6   | 1156.3 | 1235.6 | 1378.7 | 1437.7 | 1554.6 |
| 10.5        | -0.388                               | 0.222 | 617.1 | 671.0 | 702.3 | 792.7  | 854.4  | 988.3    | 1153.2 | 1257.7 | 1465.4 | 1558.7 | 1759.0                             | 0.207  | 0.195 | 676.1 | 743.3 | 781.0 | 885.1  | 952.0  | 1087.5   | 1237.8 | 1325.0 | 1482.5 | 1547.4 | 1676.2 |
| 11          | -0.37                                | 0.229 | 653.8 | 712.9 | 747.3 | 846.9  | 915.0  | 1063.4   | 1246.8 | 1363.5 | 1595.7 | 1700.5 | 1925.4                             | 0.224  | 0.2   | 712.1 | 785.8 | 827.2 | 941.8  | 1015.6 | 1164.9   | 1330.8 | 1427.1 | 1601.0 | 1672.7 | 1814.8 |
| 11.5        | -0.353                               | 0.228 | 703.0 | 766.8 | 803.8 | 911.0  | 984.1  | 1143.1   | 1338.8 | 1462.9 | 1709.1 | 1819.7 | 2056.4                             | 0.241  | 0.206 | 755.6 | 836.9 | 882.5 | 1009.0 | 1090.5 | 1255.6   | 1439.0 | 1545.5 | 1737.8 | 1817.1 | 1974.2 |
| 12          | -0.337                               | 0.22  | 763.7 | 831.2 | 870.2 | 982.7  | 1059.0 | 1223.8   | 1424.8 | 1551.0 | 1799.3 | 1909.8 | 2144.7                             | 0.256  | 0.209 | 809.9 | 899.6 | 950.0 | 1089.7 | 1179.8 | 1362.2   | 1564.8 | 1682.4 | 1894.6 | 1982.0 | 2155.2 |
| 12.5        | -0.322                               | 0.207 | 831.2 | 901.3 | 941.7 | 1057.3 | 1135.0 | 1301.4   | 1501.5 | 1625.9 | 1867.4 | 1973.8 | 2197.7                             | 0.271  | 0.2   |       |       |       |        |        |          |        |        |        |        |        |



Supplementary Table 38. Smoothed percentiles for right leg lean mass for female and male 5 to 18 years.

| Age (years) | DXA right leg lean mass (g)          |       |        |        |        |        |        |          |        |        |        |                                    |        |        |       |        |        |        |        |        |          |        |        |         |         |         |
|-------------|--------------------------------------|-------|--------|--------|--------|--------|--------|----------|--------|--------|--------|------------------------------------|--------|--------|-------|--------|--------|--------|--------|--------|----------|--------|--------|---------|---------|---------|
|             | Female LMS parameters and percentile |       |        |        |        |        |        |          |        |        |        | Male LMS parameters and percentile |        |        |       |        |        |        |        |        |          |        |        |         |         |         |
|             | L                                    | S     | 1th    | 3th    | 5th    | 15th   | 25th   | 50th (M) | 75th   | 85th   | 95th   | 97th                               | 99th   | L      | S     | 1th    | 3th    | 5th    | 15th   | 25th   | 50th (M) | 75th   | 85th   | 95th    | 97th    | 99th    |
| 5           | -0.827                               | 0.178 | 1150.4 | 1222.3 | 1263.8 | 1383.7 | 1465.4 | 1643.4   | 1865.4 | 2008.5 | 2299.7 | 2434.2                             | 2731.6 | -0.835 | 0.138 | 1403.6 | 1474.8 | 1515.2 | 1629.4 | 1705.1 | 1864.8   | 2054.3 | 2171.2 | 2397.7  | 2497.6  | 2708.5  |
| 5.5         | -0.763                               | 0.16  | 1303.2 | 1379.2 | 1422.7 | 1546.9 | 1630.1 | 1808.1   | 2023.5 | 2158.7 | 2425.1 | 2544.5                             | 2800.6 | -0.724 | 0.133 | 1493.9 | 1569.4 | 1612.1 | 1731.9 | 1810.7 | 1975.1   | 2167.1 | 2283.8 | 2506.3  | 2602.9  | 2803.7  |
| 6           | -0.704                               | 0.151 | 1427.9 | 1508.6 | 1554.5 | 1684.6 | 1771.1 | 1954     | 2171.6 | 2306.1 | 2566.8 | 2681.7                             | 2924.3 | -0.622 | 0.132 | 1607   | 1689.6 | 1736.2 | 1866.4 | 1951.5 | 2128     | 2331.9 | 2454.7 | 2686.4  | 2785.9  | 2990.9  |
| 6.5         | -0.651                               | 0.152 | 1518.5 | 1606.1 | 1655.9 | 1796.9 | 1890.4 | 2087.6   | 2321.4 | 2465.2 | 2721.7 | 2864.5                             | 3120.3 | -0.53  | 0.134 | 1716.9 | 1808.2 | 1859.5 | 2002.7 | 2096.1 | 2288.8   | 2510.1 | 2642.5 | 2890.7  | 2966.6  | 3213.5  |
| 7           | -0.601                               | 0.16  | 1594   | 1691.5 | 1747.1 | 1904.7 | 2009.6 | 2231.5   | 2495.3 | 2658.2 | 2973.3 | 3111.8                             | 3403.4 | -0.444 | 0.138 | 1811.8 | 1913   | 1969.8 | 2128.3 | 2231.4 | 2443.8   | 2686.6 | 2831.5 | 3101.8  | 3216.7  | 3451    |
| 7.5         | -0.555                               | 0.171 | 1671.5 | 1781   | 1843.6 | 2021.9 | 2140.9 | 2394     | 2696.8 | 2884.6 | 3249.6 | 3410.7                             | 3751.1 | -0.363 | 0.144 | 1899.1 | 2012.3 | 2076   | 2253.6 | 2369.1 | 2606.9   | 2878.5 | 3040.3 | 3341.4  | 3469.2  | 3729.1  |
| 8           | -0.511                               | 0.179 | 1762   | 1884   | 1953.9 | 2153.2 | 2286.7 | 2571.2   | 2912.9 | 3125.4 | 3539.2 | 3722.2                             | 4109.3 | -0.286 | 0.153 | 1990.6 | 2119   | 2191.3 | 2393   | 2524.4 | 2795.1   | 3104.2 | 3288.3 | 3630.7  | 3775.7  | 4070.6  |
| 8.5         | -0.47                                | 0.184 | 1869.8 | 2004.3 | 2081.3 | 2301.4 | 2448.9 | 2763.4   | 3141.2 | 3376   | 3833   | 4034.9                             | 4461.5 | -0.211 | 0.163 | 2087.5 | 2233.6 | 2316   | 2546.1 | 2696.2 | 3005.4   | 3358.6 | 3568.8 | 3959.4  | 4124.6  | 4460.1  |
| 9           | -0.432                               | 0.189 | 1987.4 | 2135.6 | 2220.5 | 2463.2 | 2626   | 2973.3   | 3390.2 | 3649.2 | 4152.8 | 4375                               | 4843.8 | -0.136 | 0.171 | 2190.5 | 2355.8 | 2449   | 2709.3 | 2879   | 3228.6   | 3627.2 | 3864   | 4302.8  | 4488    | 4862.9  |
| 9.5         | -0.396                               | 0.196 | 2104.4 | 2268.5 | 2362.8 | 2632.5 | 2813.7 | 3200.9   | 3666.8 | 3956.5 | 4520.3 | 4769.2                             | 5294.4 | -0.062 | 0.177 | 2305.6 | 2490.5 | 2594.8 | 2885.6 | 3074.9 | 3463.7   | 3905.1 | 4166.3 | 4648.1  | 4850.5  | 5258.8  |
| 10          | -0.361                               | 0.205 | 2219.7 | 2402   | 2506.9 | 2807.9 | 3010.6 | 3445     | 3969.4 | 4296.3 | 4933.7 | 5215.6                             | 5810.8 | 0.01   | 0.182 | 2434.5 | 2640.5 | 2756.5 | 3079.5 | 3289.1 | 3718.2   | 4202.5 | 4487.7 | 5010.8  | 5229.5  | 5668.7  |
| 10.5        | -0.329                               | 0.213 | 2342   | 2543.5 | 2659.7 | 2993.6 | 3219   | 3703     | 4288.7 | 4654.3 | 5368.2 | 5684.1                             | 6351.5 | 0.079  | 0.186 | 2574.8 | 2804.1 | 2933.1 | 3291.1 | 3522.8 | 3995.1   | 4525.1 | 4835.5 | 5401.8  | 5637.4  | 6108.3  |
| 11          | -0.297                               | 0.216 | 2485.9 | 2706.1 | 2833.1 | 3198   | 3444.4 | 3973.3   | 4612.4 | 5010.9 | 5737.3 | 6130.2                             | 6853.1 | 0.143  | 0.189 | 2727.3 | 2979.2 | 3122.3 | 3518.7 | 3774.4 | 4293.6   | 4872.8 | 5210.3 | 5822.9  | 6076.5  | 6581.4  |
| 11.5        | -0.267                               | 0.214 | 2665.4 | 2902.1 | 3038.3 | 3428.9 | 3691.6 | 4253.2   | 4927.7 | 5345.8 | 6155.4 | 6510.9                             | 7256.3 | 0.201  | 0.192 | 2887.9 | 3170.2 | 3328.4 | 3765.6 | 4046.8 | 4615.3   | 5245.9 | 5611.7 | 6272.2  | 6544.5  | 7084.4  |
| 12          | -0.239                               | 0.206 | 2876.7 | 3126.6 | 3269.8 | 3678.6 | 3951.9 | 4531.9   | 5221.1 | 5644.5 | 6456.9 | 6810.5                             | 7546.3 | 0.251  | 0.194 | 3075.4 | 3386.1 | 3559.9 | 4038.8 | 4345.6 | 4963.7   | 5645.3 | 6038.8 | 6746    | 7036.3  | 7609.9  |
| 12.5        | -0.211                               | 0.195 | 3106.7 | 3365.9 | 3513.8 | 3932.9 | 4211.1 | 4795.9   | 5482.1 | 5899.3 | 6690.9 | 7032.2                             | 7736   | 0.294  | 0.193 | 3302.1 | 3640.6 | 3829.5 | 4348.3 | 4679.4 | 5343.4   | 6071.3 | 6488.3 | 7237.8  | 7543.6  | 8146    |
| 13          | -0.185                               | 0.183 | 3337.4 | 3602   | 3752.2 | 4175   | 4453.4 | 5033.1   | 5704.4 | 6108.2 | 6866.2 | 7189.7                             | 7851.5 | 0.328  | 0.189 | 3575.4 | 3939.7 | 4142.4 | 4697   | 5049.6 | 5753.3   | 6520.1 | 6958.5 | 7739.5  | 8057.6  | 8681.9  |
| 13.5        | -0.16                                | 0.172 | 3553.3 | 3820.4 | 3971.2 | 4393   | 4668.5 | 5237.3   | 5888   | 6275.7 | 6996.1 | 7301                               | 7919.7 | 0.354  | 0.184 | 3891.4 | 4278.4 | 4493   | 5078.1 | 5448.5 | 6184.3   | 6981.5 | 7435.4 | 8240.5  | 8567.2  | 9206.8  |
| 14          | -0.135                               | 0.162 | 3744.3 | 4011.9 | 4162.4 | 4581   | 4852.6 | 5409     | 6039   | 6411.1 | 7096.9 | 7385                               | 7966   | 0.373  | 0.177 | 4233.4 | 4638.7 | 4862.9 | 5471.9 | 5855.8 | 6615.3   | 7433.9 | 7898.1 | 8718.6  | 9050.6  | 9698.9  |
| 14.5        | -0.112                               | 0.154 | 3903.1 | 4170.9 | 4321   | 4736.6 | 5004.7 | 5550.7   | 6163.7 | 6523.4 | 7181.9 | 7456.8                             | 8008.6 | 0.385  | 0.17  | 4569.5 | 4988   | 5218.8 | 5843.9 | 6236.5 | 7010.7   | 7841.2 | 8310.6 | 9137.9  | 9471.8  | 10122.5 |
| 15          | -0.089                               | 0.149 | 4025.4 | 4294.3 | 4444.6 | 4859.3 | 5125.8 | 5666     | 6268.7 | 6620.7 | 7261.8 | 7528.3                             | 8061.2 | 0.393  | 0.163 | 4872   | 5298.4 | 5533   | 6166.9 | 6563.9 | 7344.3   | 8178.6 | 8648.9 | 9475.7  | 9808.7  | 10458.6 |
| 15.5        | -0.067                               | 0.146 | 4110.9 | 4382.4 | 4533.8 | 4950.7 | 5218   | 5758     | 6358.1 | 6707.3 | 7341.3 | 7604.1                             | 8128.1 | 0.397  | 0.157 | 5126.8 | 5553.3 | 5793.8 | 6431.3 | 6829.7 | 7611.2   | 8444.2 | 8912.9 | 9735.5  | 10066.3 | 10709.4 |
| 16          | -0.046                               | 0.146 | 4162.2 | 4437.8 | 4591.4 | 5013.7 | 5284   | 5829.2   | 6433.5 | 6784.4 | 7420.2 | 7683.2                             | 8206.9 | 0.397  | 0.153 | 5326.2 | 5758.4 | 5995.6 | 6634   | 7032.4 | 7812.6   | 8642.8 | 9109.3 | 9927    | 10255.6 | 10893.8 |
| 16.5        | -0.025                               | 0.147 | 4184   | 4465   | 4621.5 | 5051.7 | 5326.9 | 5881.4   | 6495.3 | 6851.4 | 7495.7 | 7762                               | 8291.7 | 0.395  | 0.15  | 5474.5 | 5907.9 | 6145.6 | 6784.8 | 7183.4 | 7963.3   | 8792.4 | 9257.9 | 10073.5 | 10401.1 | 11037.1 |
| 17          | -0.005                               | 0.149 | 4184.5 | 4471.2 | 4630.9 | 5069.6 | 5350.2 | 5915.5   | 6540.8 | 6903.3 | 7558.7 | 7829.4                             | 8367.4 | 0.39   | 0.148 | 5580.5 | 6016.2 | 6255.1 | 6897.5 | 7298   | 8081.5   | 8914.2 | 9381.7 | 10200.8 | 10529.7 | 11168.4 |
| 17.5        | 0.015                                | 0.151 | 4171.9 | 4463.5 | 4626   | 5072.4 | 5357.8 | 5932.5   | 6567.9 | 6936.1 | 7601.3 | 7875.8                             | 8421.2 | 0.384  | 0.148 | 5653   | 6093   | 6334.3 | 6983.3 | 7388.1 | 8180.3   | 9022.8 | 9496   | 10325.3 | 10658.5 | 11305.6 |
| 18          | 0.034                                | 0.153 | 4152.2 | 4447.8 | 4612.4 | 5064.6 | 5353.7 | 5935.5   | 6578.1 | 6950.2 | 7621.9 | 7898.9                             | 8448.8 | 0.377  | 0.149 | 5700.3 | 6146.4 | 6391.2 | 7050.1 | 7461.4 | 8267     | 9124.8 | 9607   | 10452.8 | 10792.9 | 11453.6 |

Supplementary Table 39. Smoothed percentiles for trunk lean mass for female and male 5 to 18 years.

| Age  | DXA Truncal lean mass (g)            |       |      |      |      |       |       |          |       |       |       |                                    |       |        |       |      |      |      |       |       |          |       |       |       |       |       |
|------|--------------------------------------|-------|------|------|------|-------|-------|----------|-------|-------|-------|------------------------------------|-------|--------|-------|------|------|------|-------|-------|----------|-------|-------|-------|-------|-------|
|      | Female LMS parameters and percentile |       |      |      |      |       |       |          |       |       |       | Male LMS parameters and percentile |       |        |       |      |      |      |       |       |          |       |       |       |       |       |
|      | L                                    | S     | 1th  | 3th  | 5th  | 15th  | 25th  | 50th (M) | 75th  | 85th  | 95th  | 97th                               | 99th  | L      | S     | 1th  | 3th  | 5th  | 15th  | 25th  | 50th (M) | 75th  | 85th  | 95th  | 97th  | 99th  |
| 5    | -0.653                               | 0.124 | 4172 | 4374 | 4487 | 4804  | 5010  | 5435     | 5924  | 6217  | 6766  | 7001                               | 7484  | 0.361  | 0.138 | 4195 | 4493 | 4656 | 5094  | 5366  | 5899     | 6464  | 6781  | 7335  | 7558  | 7990  |
| 5.5  | -0.566                               | 0.107 | 4587 | 4785 | 4895 | 5199  | 5394  | 5790     | 6233  | 6493  | 6970  | 7170                               | 7573  | 0.362  | 0.122 | 4654 | 4941 | 5098 | 5516  | 5775  | 6279     | 6809  | 7105  | 7621  | 7827  | 8227  |
| 6    | -0.487                               | 0.102 | 4860 | 5064 | 5177 | 5487  | 5684  | 6081     | 6521  | 6777  | 7242  | 7435                               | 7821  | 0.319  | 0.111 | 5140 | 5422 | 5576 | 5987  | 6240  | 6733     | 7250  | 7539  | 8042  | 8243  | 8632  |
| 6.5  | -0.414                               | 0.108 | 5004 | 5228 | 5353 | 5694  | 5912  | 6351     | 6837  | 7120  | 7634  | 7848                               | 8275  | 0.189  | 0.105 | 5563 | 5841 | 5993 | 6400  | 6652  | 7143     | 7664  | 7955  | 8466  | 8671  | 9069  |
| 7    | -0.346                               | 0.120 | 5108 | 5365 | 5508 | 5901  | 6153  | 6662     | 7230  | 7562  | 8168  | 8421                               | 8927  | -0.006 | 0.103 | 5899 | 6175 | 6326 | 6733  | 6988  | 7489     | 8027  | 8331  | 8868  | 9086  | 9512  |
| 7.5  | -0.283                               | 0.133 | 5228 | 5522 | 5686 | 6140  | 6432  | 7026     | 7691  | 8082  | 8798  | 9098                               | 9700  | -0.220 | 0.105 | 6146 | 6425 | 6580 | 6999  | 7263  | 7790     | 8365  | 8694  | 9284  | 9526  | 10004 |
| 8    | -0.225                               | 0.142 | 5386 | 5716 | 5901 | 6412  | 6742  | 7414     | 8170  | 8615  | 9431  | 9773                               | 10461 | -0.417 | 0.111 | 6377 | 6670 | 6832 | 7279  | 7565  | 8141     | 8781  | 9155  | 9835  | 10118 | 10685 |
| 8.5  | -0.169                               | 0.148 | 5600 | 5963 | 6166 | 6728  | 7090  | 7829     | 8659  | 9147  | 10042 | 10416                              | 11168 | -0.566 | 0.119 | 6612 | 6926 | 7102 | 7590  | 7906  | 8552     | 9285  | 9719  | 10525 | 10866 | 11558 |
| 9    | -0.117                               | 0.153 | 5856 | 6252 | 6475 | 7090  | 7486  | 8293     | 9198  | 9730  | 10701 | 11107                              | 11920 | -0.637 | 0.128 | 6842 | 7183 | 7376 | 7912  | 8262  | 8987     | 9821  | 10322 | 11266 | 11670 | 12502 |
| 9.5  | -0.068                               | 0.159 | 6124 | 6563 | 6809 | 7490  | 7929  | 8822     | 9824  | 10411 | 11484 | 11931                              | 12827 | -0.621 | 0.135 | 7077 | 7449 | 7659 | 8247  | 8633  | 9435     | 10364 | 10926 | 11989 | 12447 | 13393 |
| 10   | -0.021                               | 0.167 | 6399 | 6890 | 7165 | 7927  | 8419  | 9421     | 10545 | 11204 | 12407 | 12909                              | 13913 | -0.539 | 0.142 | 7325 | 7735 | 7966 | 8614  | 9039  | 9922     | 10946 | 11563 | 12730 | 13231 | 14266 |
| 10.5 | 0.024                                | 0.175 | 6700 | 7249 | 7557 | 8411  | 8964  | 10089    | 11352 | 12092 | 13444 | 14006                              | 15133 | -0.413 | 0.148 | 7593 | 8050 | 8309 | 9032  | 9504  | 10483    | 11611 | 12288 | 13558 | 14101 | 15212 |
| 11   | 0.066                                | 0.180 | 7075 | 7681 | 8022 | 8967  | 9577  | 10819    | 12210 | 13024 | 14507 | 15124                              | 16355 | -0.260 | 0.156 | 7882 | 8403 | 8697 | 9516  | 10050 | 11149    | 12404 | 13151 | 14540 | 15128 | 16322 |
| 11.5 | 0.106                                | 0.179 | 7580 | 8235 | 8602 | 9616  | 10269 | 11593    | 13066 | 13925 | 15481 | 16125                              | 17407 | -0.094 | 0.164 | 8203 | 8805 | 9143 | 10083 | 10691 | 11936    | 13340 | 14168 | 15689 | 16326 | 17607 |
| 12   | 0.145                                | 0.171 | 8203 | 8891 | 9275 | 10332 | 11008 | 12369    | 13871 | 14740 | 16305 | 16949                              | 18224 | 0.072  | 0.171 | 8581 | 9280 | 9671 | 10    |       |          |       |       |       |       |       |



Supplementary Table 40. Smoothed percentiles for appendicular lean mass for female and male 5 to 18 years.

| DXA Appendicular lean mass (kg) |                                      |       |       |       |       |       |       |          |       |       |       |       |       |        |                                    |       |       |       |       |       |          |       |       |       |       |       |
|---------------------------------|--------------------------------------|-------|-------|-------|-------|-------|-------|----------|-------|-------|-------|-------|-------|--------|------------------------------------|-------|-------|-------|-------|-------|----------|-------|-------|-------|-------|-------|
| Age (years)                     | Female LMS parameters and percentile |       |       |       |       |       |       |          |       |       |       |       |       |        | Male LMS parameters and percentile |       |       |       |       |       |          |       |       |       |       |       |
|                                 | L                                    | S     | 1th   | 3th   | 5th   | 15th  | 25th  | 50th (M) | 75th  | 85th  | 95th  | 97th  | 99th  | L      | S                                  | 1th   | 3th   | 5th   | 15th  | 25th  | 50th (M) | 75th  | 85th  | 95th  | 97th  | 99th  |
| 5                               | -1.096                               | 0.185 | 2.95  | 3.13  | 3.23  | 3.53  | 3.74  | 4.20     | 4.80  | 5.21  | 6.08  | 6.51  | 7.52  | -0.742 | 0.133                              | 3.49  | 3.67  | 3.77  | 4.05  | 4.23  | 4.61     | 5.06  | 5.34  | 5.86  | 6.08  | 6.56  |
| 5.5                             | -1.01                                | 0.163 | 3.37  | 3.55  | 3.66  | 3.97  | 4.18  | 4.64     | 5.21  | 5.59  | 6.34  | 6.70  | 7.48  | -0.634 | 0.133                              | 3.79  | 3.99  | 4.10  | 4.41  | 4.61  | 5.03     | 5.51  | 5.81  | 6.36  | 6.60  | 7.09  |
| 6                               | -0.931                               | 0.151 | 3.70  | 3.90  | 4.01  | 4.34  | 4.55  | 5.02     | 5.58  | 5.94  | 6.65  | 6.98  | 7.67  | -0.534 | 0.134                              | 4.10  | 4.32  | 4.44  | 4.78  | 5.01  | 5.47     | 6.00  | 6.32  | 6.91  | 7.17  | 7.69  |
| 6.5                             | -0.858                               | 0.149 | 3.95  | 4.16  | 4.28  | 4.62  | 4.85  | 5.35     | 5.94  | 6.31  | 7.04  | 7.37  | 8.07  | -0.442 | 0.136                              | 4.38  | 4.62  | 4.76  | 5.14  | 5.39  | 5.89     | 6.47  | 6.82  | 7.46  | 7.74  | 8.29  |
| 7                               | -0.791                               | 0.156 | 4.14  | 4.38  | 4.51  | 4.89  | 5.15  | 5.69     | 6.35  | 6.77  | 7.58  | 7.94  | 8.72  | -0.357 | 0.14                               | 4.62  | 4.89  | 5.04  | 5.46  | 5.73  | 6.29     | 6.93  | 7.30  | 8.00  | 8.30  | 8.89  |
| 7.5                             | -0.728                               | 0.166 | 4.33  | 4.59  | 4.74  | 5.18  | 5.47  | 6.09     | 6.84  | 7.32  | 8.26  | 8.68  | 9.59  | -0.278 | 0.145                              | 4.84  | 5.14  | 5.31  | 5.78  | 6.08  | 6.69     | 7.39  | 7.81  | 8.58  | 8.90  | 9.55  |
| 8                               | -0.669                               | 0.177 | 4.53  | 4.83  | 5.00  | 5.48  | 5.81  | 6.52     | 7.39  | 7.93  | 9.02  | 9.51  | 10.57 | -0.205 | 0.153                              | 5.07  | 5.40  | 5.59  | 6.11  | 6.45  | 7.14     | 7.93  | 8.39  | 9.24  | 9.60  | 10.33 |
| 8.5                             | -0.614                               | 0.186 | 4.76  | 5.09  | 5.28  | 5.83  | 6.20  | 6.99     | 7.97  | 8.59  | 9.82  | 10.38 | 11.58 | -0.135 | 0.16                               | 5.31  | 5.68  | 5.90  | 6.48  | 6.86  | 7.64     | 8.52  | 9.04  | 10.00 | 10.40 | 11.21 |
| 9                               | -0.562                               | 0.194 | 5.02  | 5.39  | 5.60  | 6.21  | 6.62  | 7.51     | 8.60  | 9.30  | 10.68 | 11.30 | 12.64 | -0.07  | 0.168                              | 5.56  | 5.98  | 6.22  | 6.88  | 7.30  | 8.17     | 9.16  | 9.74  | 10.80 | 11.25 | 12.14 |
| 9.5                             | -0.513                               | 0.202 | 5.30  | 5.71  | 5.94  | 6.62  | 7.08  | 8.07     | 9.29  | 10.07 | 11.61 | 12.31 | 13.81 | -0.008 | 0.174                              | 5.84  | 6.31  | 6.57  | 7.30  | 7.77  | 8.74     | 9.83  | 10.47 | 11.64 | 12.12 | 13.10 |
| 10                              | -0.466                               | 0.21  | 5.59  | 6.04  | 6.30  | 7.05  | 7.56  | 8.67     | 10.04 | 10.91 | 12.64 | 13.42 | 15.09 | 0.051  | 0.179                              | 6.15  | 6.67  | 6.97  | 7.78  | 8.30  | 9.37     | 10.56 | 11.26 | 12.54 | 13.07 | 14.14 |
| 10.5                            | -0.422                               | 0.216 | 5.90  | 6.40  | 6.68  | 7.52  | 8.08  | 9.31     | 10.83 | 11.79 | 13.70 | 14.56 | 16.40 | 0.107  | 0.183                              | 6.50  | 7.08  | 7.40  | 8.30  | 8.88  | 10.06    | 11.37 | 12.14 | 13.53 | 14.11 | 15.26 |
| 11                              | -0.38                                | 0.219 | 6.27  | 6.81  | 7.13  | 8.03  | 8.65  | 9.99     | 11.63 | 12.66 | 14.71 | 15.63 | 17.59 | 0.16   | 0.188                              | 6.88  | 7.52  | 7.88  | 8.88  | 9.52  | 10.82    | 12.26 | 13.10 | 14.62 | 15.25 | 16.49 |
| 11.5                            | -0.339                               | 0.216 | 6.72  | 7.31  | 7.65  | 8.62  | 9.27  | 10.69    | 12.41 | 13.49 | 15.60 | 16.54 | 18.53 | 0.211  | 0.191                              | 7.31  | 8.02  | 8.42  | 9.52  | 10.22 | 11.65    | 13.23 | 14.14 | 15.79 | 16.47 | 17.81 |
| 12                              | -0.3                                 | 0.207 | 7.27  | 7.89  | 8.24  | 9.26  | 9.94  | 11.40    | 13.14 | 14.22 | 16.32 | 17.24 | 19.17 | 0.26   | 0.193                              | 7.79  | 8.58  | 9.02  | 10.23 | 11.00 | 12.56    | 14.27 | 15.26 | 17.03 | 17.76 | 19.20 |
| 12.5                            | -0.263                               | 0.195 | 7.86  | 8.50  | 8.86  | 9.91  | 10.60 | 12.06    | 13.79 | 14.85 | 16.87 | 17.75 | 19.57 | 0.307  | 0.192                              | 8.37  | 9.23  | 9.71  | 11.03 | 11.87 | 13.55    | 15.39 | 16.44 | 18.33 | 19.10 | 20.61 |
| 13                              | -0.228                               | 0.183 | 8.44  | 9.10  | 9.47  | 10.52 | 11.22 | 12.67    | 14.35 | 15.37 | 17.30 | 18.12 | 19.81 | 0.352  | 0.189                              | 9.06  | 10.00 | 10.52 | 11.93 | 12.83 | 14.63    | 16.57 | 17.68 | 19.66 | 20.46 | 22.03 |
| 13.5                            | -0.193                               | 0.171 | 8.98  | 9.65  | 10.02 | 11.07 | 11.76 | 13.18    | 14.82 | 15.79 | 17.61 | 18.39 | 19.96 | 0.395  | 0.184                              | 9.85  | 10.85 | 11.41 | 12.92 | 13.87 | 15.76    | 17.79 | 18.95 | 20.99 | 21.81 | 23.43 |
| 14                              | -0.16                                | 0.161 | 9.46  | 10.12 | 10.50 | 11.55 | 12.22 | 13.62    | 15.20 | 16.13 | 17.86 | 18.59 | 20.06 | 0.436  | 0.178                              | 10.69 | 11.76 | 12.34 | 13.93 | 14.93 | 16.89    | 18.99 | 20.18 | 22.26 | 23.10 | 24.73 |
| 14.5                            | -0.128                               | 0.154 | 9.85  | 10.52 | 10.89 | 11.93 | 12.61 | 13.98    | 15.51 | 16.42 | 18.08 | 18.77 | 20.16 | 0.477  | 0.172                              | 11.51 | 12.63 | 13.24 | 14.89 | 15.92 | 17.94    | 20.08 | 21.28 | 23.39 | 24.23 | 25.87 |
| 15                              | -0.098                               | 0.149 | 10.15 | 10.82 | 11.20 | 12.24 | 12.91 | 14.27    | 15.78 | 16.67 | 18.28 | 18.96 | 20.30 | 0.515  | 0.166                              | 12.26 | 13.42 | 14.05 | 15.74 | 16.79 | 18.84    | 21.00 | 22.21 | 24.31 | 25.15 | 26.77 |
| 15.5                            | -0.068                               | 0.146 | 10.36 | 11.04 | 11.42 | 12.47 | 13.15 | 14.51    | 16.02 | 16.90 | 18.50 | 19.16 | 20.48 | 0.553  | 0.16                               | 12.90 | 14.08 | 14.72 | 16.44 | 17.51 | 19.57    | 21.73 | 22.94 | 25.02 | 25.85 | 27.45 |
| 16                              | -0.039                               | 0.146 | 10.49 | 11.19 | 11.58 | 12.64 | 13.32 | 14.70    | 16.22 | 17.11 | 18.71 | 19.37 | 20.69 | 0.589  | 0.155                              | 13.42 | 14.62 | 15.27 | 17.01 | 18.08 | 20.15    | 22.31 | 23.50 | 25.57 | 26.39 | 27.96 |
| 16.5                            | -0.011                               | 0.147 | 10.55 | 11.27 | 11.66 | 12.75 | 13.44 | 14.84    | 16.39 | 17.29 | 18.91 | 19.57 | 20.90 | 0.625  | 0.152                              | 13.84 | 15.06 | 15.72 | 17.48 | 18.56 | 20.63    | 22.78 | 23.97 | 26.02 | 26.83 | 28.39 |
| 17                              | 0.016                                | 0.149 | 10.56 | 11.29 | 11.69 | 12.80 | 13.51 | 14.94    | 16.52 | 17.43 | 19.07 | 19.75 | 21.10 | 0.659  | 0.15                               | 14.19 | 15.43 | 16.10 | 17.89 | 18.97 | 21.06    | 23.22 | 24.41 | 26.45 | 27.26 | 28.81 |
| 17.5                            | 0.043                                | 0.151 | 10.52 | 11.26 | 11.68 | 12.81 | 13.54 | 14.99    | 16.60 | 17.53 | 19.20 | 19.89 | 21.25 | 0.692  | 0.148                              | 14.49 | 15.77 | 16.45 | 18.27 | 19.37 | 21.48    | 23.66 | 24.86 | 26.91 | 27.72 | 29.27 |
| 18                              | 0.068                                | 0.154 | 10.45 | 11.21 | 11.63 | 12.79 | 13.53 | 15.01    | 16.64 | 17.59 | 19.28 | 19.98 | 21.37 | 0.724  | 0.148                              | 14.78 | 16.09 | 16.79 | 18.65 | 19.78 | 21.93    | 24.14 | 25.35 | 27.43 | 28.24 | 29.80 |

Supplementary Table 41. Smoothed percentiles for right arm bone mineral content for female and male 5 to 18 years.

| DXA right arm bone mineral content (g) |                                      |       |      |      |      |      |      |          |       |       |       |       |       |        |                                    |      |      |      |      |      |          |       |       |       |       |       |
|----------------------------------------|--------------------------------------|-------|------|------|------|------|------|----------|-------|-------|-------|-------|-------|--------|------------------------------------|------|------|------|------|------|----------|-------|-------|-------|-------|-------|
| Age (years)                            | Female LMS parameters and percentile |       |      |      |      |      |      |          |       |       |       |       |       |        | Male LMS parameters and percentile |      |      |      |      |      |          |       |       |       |       |       |
|                                        | L                                    | S     | 1th  | 3th  | 5th  | 15th | 25th | 50th (M) | 75th  | 85th  | 95th  | 97th  | 99th  | L      | S                                  | 1th  | 3th  | 5th  | 15th | 25th | 50th (M) | 75th  | 85th  | 95th  | 97th  | 99th  |
| 5                                      | 0.483                                | 0.16  | 19.7 | 21.4 | 22.4 | 24.9 | 26.5 | 29.7     | 32.9  | 34.8  | 38    | 39.3  | 41.8  | -0.43  | 0.131                              | 23.4 | 24.7 | 25.4 | 27.3 | 28.6 | 31.2     | 34.2  | 35.9  | 39.1  | 40.5  | 43.3  |
| 5.5                                    | 0.463                                | 0.15  | 22   | 23.8 | 24.8 | 27.4 | 29   | 32.2     | 35.6  | 37.4  | 40.7  | 42    | 44.5  | -0.368 | 0.135                              | 23.8 | 25.1 | 25.9 | 27.9 | 29.3 | 32       | 35.1  | 37    | 40.4  | 41.8  | 44.8  |
| 6                                      | 0.445                                | 0.147 | 24   | 25.8 | 26.9 | 29.7 | 31.4 | 34.7     | 38.3  | 40.3  | 43.7  | 45.1  | 47.8  | -0.311 | 0.139                              | 25.6 | 27.1 | 28   | 30.3 | 31.8 | 34.9     | 38.4  | 40.5  | 44.3  | 45.9  | 49.1  |
| 6.5                                    | 0.428                                | 0.151 | 25.5 | 27.6 | 28.7 | 31.7 | 33.6 | 37.3     | 41.2  | 43.4  | 47.2  | 48.7  | 51.7  | -0.258 | 0.143                              | 27.9 | 29.6 | 30.6 | 33.2 | 34.9 | 38.4     | 42.4  | 44.7  | 49    | 50.8  | 54.5  |
| 7                                      | 0.412                                | 0.159 | 26.9 | 29.2 | 30.4 | 33.8 | 35.9 | 40.1     | 44.5  | 47    | 51.4  | 53.1  | 56.5  | -0.209 | 0.148                              | 29.9 | 31.8 | 32.9 | 35.8 | 37.8 | 41.7     | 46.1  | 48.7  | 53.4  | 55.5  | 59.5  |
| 7.5                                    | 0.398                                | 0.168 | 28.2 | 30.7 | 32.1 | 36   | 38.4 | 43.1     | 48.1  | 51    | 56    | 58    | 62    | -0.164 | 0.152                              | 31.7 | 33.8 | 35   | 38.3 | 40.4 | 44.8     | 49.6  | 52.5  | 57.8  | 60    | 64.5  |
| 8                                      | 0.384                                | 0.177 | 29.5 | 32.3 | 33.9 | 38.2 | 40.9 | 46.2     | 51.9  | 55.1  | 60.9  | 63.2  | 67.7  | -0.122 | 0.157                              | 33.8 | 36.1 | 37.4 | 41.1 | 43.4 | 48.3     | 53.7  | 56.9  | 62.8  | 65.2  | 70.1  |
| 8.5                                    | 0.372                                | 0.184 | 31.1 | 34.2 | 36   | 40.7 | 43.7 | 49.6     | 56    | 59.7  | 66.1  | 68.7  | 73.8  | -0.082 | 0.162                              | 36   | 38.6 | 40   | 44.1 | 46.8 | 52.1     | 58.2  | 61.7  | 68.3  | 71    | 76.5  |
| 9                                      | 0.36                                 | 0.19  | 33.2 | 36.6 | 38.5 | 43.8 | 47.1 | 53.7     | 60.8  | 64.9  | 72.1  | 75.1  | 80.8  | -0.045 | 0.167                              | 38.1 | 41   | 42.7 | 47.2 | 50.1 | 56       | 62.7  | 66.7  | 73.8  | 76.9  | 82.9  |
| 9.5                                    | 0.348                                | 0.194 | 35.7 | 39.5 | 41.6 | 47.4 | 51.1 | 58.5     | 66.5  | 71    | 79.2  | 82.5  | 89    | -0.009 | 0.171                              | 40.2 | 43.4 | 45.2 | 50.1 | 53.3 | 59.8     | 67.1  | 71.4  | 79.3  | 82.6  | 89.1  |
| 10                                     | 0.337                                | 0.198 | 38.7 | 42.9 | 45.3 | 51.7 | 55.8 | 63.9     | 72.9  | 78    | 87.2  | 90.9  | 98.2  | 0.025  | 0.175                              | 42.4 | 45.9 | 47.8 | 53.2 | 56.7 | 63.8     | 71.7  | 76.4  | 84.9  | 88.5  | 95.6  |
| 10.5                                   | 0.327                                | 0.201 | 42.2 | 46.8 | 49.4 | 56.5 | 61   | 70.1     | 80    | 85.7  | 95.9  | 100.1 | 108.3 | 0.057  | 0.178                              | 44.8 | 48.6 | 50.7 | 56.6 | 60.4 | 68.1     | 76.8  | 81.8  | 91.1  | 94.9  | 102.6 |
| 11                                     | 0.317                                | 0.201 | 46.3 | 51.3 | 54.1 | 61.9 | 66.8 | 76.8     | 87.7  | 94    | 105.2 | 109.8 | 118.8 | 0.087  | 0.18                               | 47.6 | 51.8 | 54.1 | 60.5 | 64.6 | 73.1     | 82.5  | 87.9  | 97.9  | 102.1 | 110.3 |
| 11.5                                   | 0.308                                | 0.198 | 51.1 | 56.5 | 59.6 | 67.9 | 73.3 | 84       | 95.7  | 102.5 | 114.5 | 119.5 | 129.2 | 0.116  | 0.182                              | 50.9 | 55.4 | 58   | 65   | 69.5 | 78.7     | 88.9  | 94.9  | 105.7 | 110.1 | 119   |
| 12                                     | 0.299                                | 0.192 | 56.5 | 62.2 | 65.5 | 74.3 | 80   | 91.3     | 103.7 | 110.8 | 123.6 | 128.8 | 139   | 0.144  | 0.183                              | 54.8 | 59.8 | 62.6 | 70.3 | 75.2 | 85.2     | 96.3  | 102.8 | 114.5 | 119.3 | 128.9 |
| 12.5                                   | 0.29                                 | 0.185 | 62.2 | 68.2 | 71.6 | 80.8 | 86.7 | 98.4     | 111.2 | 118.6 | 131.7 | 137.1 | 147.6 | 0.171  | 0.183                              | 59.6 | 65.1 | 68.1 | 76.6 | 82   | 92.9     | 105   | 112   | 124.7 | 129.9 | 140.2 |
| 13                                     | 0.282                                | 0.176 | 67.8 | 74   | 77.5 | 86.9 | 92.9 | 104.9    | 117.9 | 125.3 | 138.6 | 144   | 154.6 | 0.197  | 0.183                              | 65.4 | 71.4 | 74.8 | 84   | 89.9 | 101.9    | 115   | 122.7 | 136.4 | 142   | 153.2 |
| 13.5                                   | 0.274                                | 0.168 | 73.1 | 79.4 | 82.9 | 92.4 | 98.5 | 110.4    | 123.4 | 130.9 | 144.1 | 149.4 | 160   | 0.221  | 0.181                              | 72.1 | 78.7 | 82.4 | 92.5 | 99   | 112      | 126.3 | 134.6 | 149.4 | 155.4 | 167.4 |
| 14                                     | 0.266                                | 0.159 | 77.9 | 84.2 | 87.7 |      |      |          |       |       |       |       |       |        |                                    |      |      |      |      |      |          |       |       |       |       |       |

Supplementary Table 42. Smoothed percentiles for right leg bone mineral content for female and male 5 to 18 years.

| Age (years) | DXA right leg bone mineral content (g) |       |       |       |       |       |       |          |       |       |       |       |                                    |        |       |       |       |       |       |       |          |       |       |       |       |       |
|-------------|----------------------------------------|-------|-------|-------|-------|-------|-------|----------|-------|-------|-------|-------|------------------------------------|--------|-------|-------|-------|-------|-------|-------|----------|-------|-------|-------|-------|-------|
|             | Female LMS parameters and percentile   |       |       |       |       |       |       |          |       |       |       |       | Male LMS parameters and percentile |        |       |       |       |       |       |       |          |       |       |       |       |       |
|             | L                                      | S     | 1th   | 3th   | 5th   | 15th  | 25th  | 50th (M) | 75th  | 85th  | 95th  | 97th  | 99th                               | L      | S     | 1th   | 3th   | 5th   | 15th  | 25th  | 50th (M) | 75th  | 85th  | 95th  | 97th  | 99th  |
| 5           | 0.249                                  | 0.16  | 55.3  | 59.8  | 62.2  | 69.0  | 73.2  | 81.7     | 90.8  | 96.0  | 105.3 | 109.1 | 116.5                              | 0.331  | 0.149 | 57.3  | 61.7  | 64.1  | 70.7  | 74.8  | 82.8     | 91.4  | 96.3  | 104.9 | 108.3 | 115.0 |
| 5.5         | 0.253                                  | 0.164 | 60.6  | 65.7  | 68.5  | 76.1  | 81.0  | 90.6     | 101.1 | 107.0 | 117.7 | 122.0 | 130.5                              | 0.045  | 0.147 | 62.9  | 67.2  | 69.6  | 76.2  | 80.4  | 88.8     | 98.1  | 103.4 | 113.1 | 117.0 | 124.8 |
| 6           | 0.256                                  | 0.17  | 65.6  | 71.3  | 74.5  | 83.1  | 88.6  | 99.5     | 111.4 | 118.1 | 130.3 | 135.2 | 144.9                              | -0.236 | 0.147 | 70.8  | 75.2  | 77.7  | 84.6  | 89.1  | 98.2     | 108.6 | 114.7 | 125.9 | 130.6 | 140.1 |
| 6.5         | 0.259                                  | 0.176 | 70.5  | 76.9  | 80.5  | 90.2  | 96.4  | 108.8    | 122.3 | 130.0 | 143.8 | 149.4 | 160.5                              | -0.49  | 0.147 | 79.6  | 84.2  | 86.9  | 94.2  | 99.1  | 109.1    | 120.8 | 127.9 | 141.2 | 146.9 | 158.7 |
| 7           | 0.262                                  | 0.183 | 75.9  | 83.1  | 87.1  | 98.1  | 105.1 | 119.1    | 134.5 | 143.3 | 159.1 | 165.6 | 178.3                              | -0.687 | 0.149 | 88.2  | 93.2  | 96.0  | 103.9 | 109.2 | 120.4    | 133.6 | 141.7 | 157.4 | 164.3 | 178.8 |
| 7.5         | 0.265                                  | 0.189 | 81.8  | 89.8  | 94.3  | 106.7 | 114.6 | 130.4    | 147.8 | 157.9 | 175.8 | 183.2 | 197.6                              | -0.825 | 0.153 | 96.7  | 102.1 | 105.1 | 113.8 | 119.6 | 132.0    | 147.0 | 156.4 | 174.9 | 183.2 | 200.9 |
| 8           | 0.268                                  | 0.193 | 88.0  | 97.0  | 102.0 | 115.7 | 124.5 | 142.2    | 161.7 | 172.9 | 193.0 | 201.2 | 217.5                              | -0.919 | 0.157 | 105.5 | 111.3 | 114.6 | 124.2 | 130.7 | 144.6    | 161.7 | 172.5 | 194.3 | 204.2 | 225.9 |
| 8.5         | 0.27                                   | 0.197 | 95.0  | 104.9 | 110.4 | 125.5 | 135.3 | 154.8    | 176.3 | 188.8 | 211.0 | 220.2 | 238.2                              | -0.948 | 0.163 | 114.4 | 120.8 | 124.5 | 135.1 | 142.3 | 158.0    | 177.4 | 189.8 | 215.1 | 226.7 | 252.4 |
| 9           | 0.272                                  | 0.198 | 103.3 | 114.1 | 120.1 | 136.8 | 147.5 | 169.0    | 192.7 | 206.4 | 230.9 | 241.0 | 260.9                              | -0.891 | 0.168 | 123.3 | 130.5 | 134.6 | 146.6 | 154.7 | 172.3    | 194.1 | 208.1 | 236.4 | 249.5 | 278.2 |
| 9.5         | 0.274                                  | 0.199 | 113.0 | 124.9 | 131.5 | 149.8 | 161.5 | 185.2    | 211.2 | 226.2 | 253.2 | 264.2 | 286.0                              | -0.748 | 0.172 | 132.5 | 140.8 | 145.5 | 159.1 | 168.3 | 188.0    | 212.3 | 227.7 | 258.4 | 272.3 | 302.5 |
| 10          | 0.276                                  | 0.198 | 124.1 | 137.1 | 144.4 | 164.4 | 177.3 | 203.1    | 231.6 | 248.0 | 277.5 | 289.6 | 313.4                              | -0.53  | 0.176 | 142.1 | 151.8 | 157.3 | 172.9 | 183.4 | 205.8    | 232.5 | 249.2 | 281.5 | 295.8 | 326.1 |
| 10.5        | 0.278                                  | 0.197 | 136.4 | 150.6 | 158.6 | 180.4 | 194.4 | 222.6    | 253.6 | 271.4 | 303.4 | 316.6 | 342.4                              | -0.254 | 0.179 | 151.9 | 163.4 | 169.9 | 188.2 | 200.3 | 225.5    | 254.9 | 272.6 | 306.1 | 320.4 | 349.9 |
| 11          | 0.28                                   | 0.194 | 149.9 | 165.3 | 173.9 | 197.6 | 212.7 | 243.1    | 276.5 | 295.7 | 330.2 | 344.3 | 372.1                              | 0.059  | 0.181 | 161.5 | 175.3 | 183.1 | 204.8 | 218.8 | 247.2    | 279.2 | 297.9 | 332.0 | 346.2 | 374.6 |
| 11.5        | 0.282                                  | 0.191 | 164.3 | 180.9 | 190.1 | 215.5 | 231.7 | 264.1    | 299.8 | 320.3 | 356.9 | 371.9 | 401.5                              | 0.378  | 0.182 | 170.5 | 187.4 | 196.8 | 222.4 | 238.6 | 270.6    | 305.1 | 324.7 | 359.4 | 373.5 | 401.0 |
| 12          | 0.284                                  | 0.187 | 178.9 | 196.5 | 206.3 | 233.2 | 250.3 | 284.6    | 322.2 | 343.7 | 382.2 | 398.0 | 428.9                              | 0.669  | 0.183 | 179.1 | 199.8 | 211.1 | 241.2 | 259.7 | 295.3    | 332.5 | 353.0 | 388.4 | 402.4 | 429.4 |
| 12.5        | 0.285                                  | 0.182 | 193.1 | 211.5 | 221.8 | 249.9 | 267.7 | 303.5    | 342.5 | 364.8 | 404.7 | 420.9 | 452.9                              | 0.9    | 0.182 | 188.4 | 213.3 | 226.6 | 261.3 | 282.1 | 321.4    | 361.2 | 382.7 | 419.2 | 433.4 | 460.4 |
| 13          | 0.287                                  | 0.178 | 205.9 | 225.0 | 235.6 | 264.6 | 283.0 | 319.7    | 359.6 | 382.5 | 423.2 | 439.8 | 472.4                              | 1.048  | 0.181 | 200.0 | 228.8 | 244.0 | 282.9 | 305.9 | 348.6    | 391.0 | 413.7 | 451.2 | 466.4 | 494.1 |
| 13.5        | 0.288                                  | 0.173 | 217.1 | 236.7 | 247.5 | 277.0 | 295.7 | 332.9    | 373.4 | 396.5 | 437.5 | 454.2 | 487.0                              | 1.106  | 0.179 | 215.4 | 247.0 | 263.5 | 305.8 | 330.6 | 376.4    | 421.5 | 445.5 | 485.6 | 501.1 | 530.1 |
| 14          | 0.29                                   | 0.168 | 226.7 | 246.4 | 257.3 | 287.1 | 305.9 | 343.4    | 383.9 | 407.0 | 448.0 | 464.7 | 497.4                              | 1.081  | 0.177 | 234.3 | 267.3 | 284.6 | 329.0 | 355.1 | 403.4    | 451.3 | 476.8 | 519.5 | 535.9 | 566.9 |
| 14.5        | 0.291                                  | 0.164 | 234.6 | 254.4 | 265.4 | 295.2 | 314.0 | 351.4    | 391.7 | 414.7 | 455.4 | 472.0 | 504.3                              | 0.994  | 0.174 | 254.7 | 287.8 | 305.4 | 350.6 | 377.6 | 427.8    | 478.1 | 505.0 | 550.4 | 568.0 | 601.3 |
| 15          | 0.292                                  | 0.16  | 241.2 | 261.0 | 272.0 | 301.7 | 320.4 | 357.5    | 397.5 | 420.3 | 460.5 | 476.9 | 508.8                              | 0.864  | 0.172 | 274.5 | 306.8 | 324.1 | 369.3 | 396.5 | 448.0    | 500.3 | 528.6 | 576.8 | 595.6 | 631.3 |
| 15.5        | 0.294                                  | 0.156 | 246.7 | 266.4 | 277.3 | 306.9 | 325.5 | 362.2    | 401.8 | 424.2 | 464.0 | 480.1 | 511.5                              | 0.707  | 0.169 | 292.5 | 323.6 | 340.4 | 384.9 | 412.1 | 464.2    | 518.0 | 547.7 | 598.5 | 618.6 | 657.0 |
| 16          | 0.295                                  | 0.153 | 251.2 | 270.8 | 281.7 | 311.0 | 329.4 | 365.8    | 404.9 | 427.0 | 466.2 | 482.0 | 512.9                              | 0.535  | 0.167 | 308.2 | 337.9 | 354.1 | 397.5 | 424.4 | 476.8    | 532.0 | 562.7 | 616.3 | 637.6 | 678.9 |
| 16.5        | 0.296                                  | 0.15  | 254.9 | 274.4 | 285.2 | 314.2 | 332.5 | 368.4    | 407.0 | 428.8 | 467.4 | 483.0 | 513.4                              | 0.355  | 0.165 | 321.9 | 350.1 | 365.7 | 407.9 | 434.4 | 486.8    | 543.1 | 574.9 | 631.1 | 653.9 | 698.2 |
| 17          | 0.297                                  | 0.147 | 258.0 | 277.3 | 287.9 | 316.7 | 334.7 | 370.2    | 408.3 | 429.8 | 467.8 | 483.1 | 513.0                              | 0.173  | 0.164 | 333.8 | 360.8 | 375.8 | 416.8 | 442.9 | 495.2    | 552.5 | 585.5 | 644.5 | 668.7 | 716.4 |
| 17.5        | 0.299                                  | 0.145 | 260.3 | 279.4 | 290.0 | 318.4 | 336.2 | 371.2    | 408.7 | 429.9 | 467.3 | 482.3 | 511.7                              | -0.009 | 0.163 | 344.5 | 370.3 | 384.7 | 424.7 | 450.4 | 502.6    | 561.0 | 595.0 | 657.1 | 682.8 | 734.3 |
| 18          | 0.3                                    | 0.142 | 262.1 | 281.0 | 291.4 | 319.5 | 337.1 | 371.6    | 408.6 | 429.4 | 466.1 | 480.9 | 509.7                              | -0.188 | 0.162 | 353.9 | 378.7 | 392.7 | 431.6 | 456.9 | 509.0    | 568.4 | 603.6 | 668.8 | 696.3 | 752.0 |

Supplementary Table 43. Smoothed percentiles for truncal bone mineral content for female and male 5 to 18 years.

| Age  | DXA Truncal lean mass (g)            |       |      |       |       |       |       |          |       |       |       |       |                                    |        |       |      |       |       |       |       |          |       |       |       |       |       |
|------|--------------------------------------|-------|------|-------|-------|-------|-------|----------|-------|-------|-------|-------|------------------------------------|--------|-------|------|-------|-------|-------|-------|----------|-------|-------|-------|-------|-------|
|      | Female LMS parameters and percentile |       |      |       |       |       |       |          |       |       |       |       | Male LMS parameters and percentile |        |       |      |       |       |       |       |          |       |       |       |       |       |
|      | L                                    | S     | 1th  | 3th   | 5th   | 15th  | 25th  | 50th (M) | 75th  | 85th  | 95th  | 97th  | 99th                               | L      | S     | 1th  | 3th   | 5th   | 15th  | 25th  | 50th (M) | 75th  | 85th  | 95th  | 97th  | 99th  |
| 5    | -0.653                               | 0.124 | 4172 | 4374  | 4487  | 4804  | 5010  | 5435     | 5924  | 6217  | 6766  | 7001  | 7484                               | 0.361  | 0.138 | 4195 | 4493  | 4656  | 5094  | 5366  | 5899     | 6464  | 6781  | 7335  | 7558  | 7990  |
| 5.5  | -0.566                               | 0.107 | 4587 | 4785  | 4895  | 5199  | 5394  | 5790     | 6233  | 6493  | 6970  | 7170  | 7573                               | 0.362  | 0.122 | 4654 | 4941  | 5098  | 5516  | 5775  | 6279     | 6809  | 7105  | 7621  | 7827  | 8227  |
| 6    | -0.487                               | 0.102 | 4860 | 5064  | 5177  | 5487  | 5684  | 6081     | 6521  | 6777  | 7242  | 7435  | 7821                               | 0.319  | 0.111 | 5140 | 5422  | 5576  | 5987  | 6240  | 6733     | 7250  | 7539  | 8042  | 8243  | 8632  |
| 6.5  | -0.414                               | 0.108 | 5004 | 5228  | 5353  | 5694  | 5912  | 6351     | 6837  | 7120  | 7634  | 7848  | 8275                               | 0.189  | 0.105 | 5563 | 5841  | 5993  | 6400  | 6652  | 7143     | 7664  | 7955  | 8466  | 8671  | 9069  |
| 7    | -0.346                               | 0.120 | 5108 | 5365  | 5508  | 5901  | 6153  | 6662     | 7230  | 7562  | 8168  | 8421  | 8927                               | -0.006 | 0.103 | 5899 | 6175  | 6326  | 6733  | 6988  | 7489     | 8027  | 8331  | 8868  | 9086  | 9512  |
| 7.5  | -0.283                               | 0.133 | 5228 | 5522  | 5686  | 6140  | 6432  | 7026     | 7691  | 8082  | 8798  | 9098  | 9700                               | -0.220 | 0.105 | 6146 | 6425  | 6580  | 6999  | 7263  | 7790     | 8365  | 8694  | 9284  | 9526  | 10004 |
| 8    | -0.225                               | 0.142 | 5386 | 5716  | 5901  | 6412  | 6742  | 7414     | 8170  | 8615  | 9431  | 9773  | 10461                              | -0.417 | 0.111 | 6377 | 6670  | 6832  | 7279  | 7565  | 8141     | 8781  | 9155  | 9835  | 10118 | 10685 |
| 8.5  | -0.169                               | 0.148 | 5600 | 5963  | 6166  | 6728  | 7090  | 7829     | 8659  | 9147  | 10042 | 10416 | 11168                              | -0.566 | 0.119 | 6612 | 6926  | 7102  | 7590  | 7906  | 8552     | 9285  | 9719  | 10525 | 10866 | 11558 |
| 9    | -0.117                               | 0.153 | 5856 | 6252  | 6475  | 7090  | 7486  | 8293     | 9198  | 9730  | 10701 | 11107 | 11920                              | -0.637 | 0.128 | 6842 | 7183  | 7376  | 7912  | 8262  | 8987     | 9821  | 10322 | 11266 | 11670 | 12502 |
| 9.5  | -0.068                               | 0.159 | 6124 | 6563  | 6809  | 7490  | 7929  | 8822     | 9824  | 10411 | 11484 | 11931 | 12827                              | -0.621 | 0.135 | 7077 | 7449  | 7659  | 8247  | 8633  | 9435     | 10364 | 10926 | 11989 | 12447 | 13393 |
| 10   | -0.021                               | 0.167 | 6399 | 6890  | 7165  | 7927  | 8419  | 9421     | 10545 | 11204 | 12407 | 12909 | 13913                              | -0.539 | 0.142 | 7325 | 7735  | 7966  | 8614  | 9039  | 9922     | 10946 | 11563 | 12730 | 13231 | 14266 |
| 10.5 | 0.024                                | 0.175 | 6700 | 7249  | 7557  | 8411  | 8964  | 10089    | 11352 | 12092 | 13444 | 14006 | 15133                              | -0.413 | 0.148 | 7593 | 8050  | 8309  | 9032  | 9504  | 10483    | 11611 | 12288 | 13558 | 14101 | 15212 |
| 11   | 0.066                                | 0.180 | 7075 | 7681  | 8022  | 8967  | 9577  | 10819    | 12210 | 13024 | 14507 | 15124 | 16355                              | -0.260 | 0.156 | 7882 | 8403  | 8697  | 9516  | 10050 | 11149    | 12404 | 13151 | 14500 | 15128 | 16322 |
| 11.5 | 0.106                                | 0.179 | 7580 | 8235  | 8602  | 9616  | 10269 | 11593    | 13066 | 13925 | 15481 | 16125 | 17407                              | -0.094 | 0.164 | 8203 | 8805  | 9143  | 10083 | 10691 | 11936    | 13340 | 14168 | 15689 | 16326 | 17607 |
| 12   | 0.145                                | 0.171 | 8203 | 8891  | 9275  | 10332 | 11008 | 12369    | 13871 | 14740 | 16305 | 16949 | 18224                              | 0.072  | 0.171 | 8581 | 9280  | 9671  | 10751 | 11445 | 12852    | 14418 | 15329 | 16983 | 17668 | 19031 |
| 12.5 | 0.183                                | 0.161 | 8892 | 9597  | 9989  | 11060 | 11741 | 13101    | 14587 | 15439 | 16963 | 17586 | 18815                              | 0.224  | 0.175 | 9074 | 9878  | 10325 | 11551 | 12332 | 13896    | 15610 | 16595 | 18358 | 19080 | 20503 |
| 13   | 0.218                                | 0.150 | 9571 | 10281 | 10673 | 11739 | 12412 | 13745    | 15188 | 16010 | 17469 | 18062 | 19225                              | 0.352  | 0.174 | 9732 | 10636 | 11136 | 12494 | 13351 |          |       |       |       |       |       |

Supplementary Table 44. Smoothed percentiles for total body fat free mass (kg) for female and male 5 to 18 years.

| Age (years) | DXA Fat free mass (kg)               |       |       |       |       |       |       |          |       |       |       |                                    |       |        |       |       |       |       |       |       |          |       |       |       |       |       |
|-------------|--------------------------------------|-------|-------|-------|-------|-------|-------|----------|-------|-------|-------|------------------------------------|-------|--------|-------|-------|-------|-------|-------|-------|----------|-------|-------|-------|-------|-------|
|             | Female LMS parameters and percentile |       |       |       |       |       |       |          |       |       |       | Male LMS parameters and percentile |       |        |       |       |       |       |       |       |          |       |       |       |       |       |
|             | L                                    | S     | 1th   | 3th   | 5th   | 15th  | 25th  | 50th (M) | 75th  | 85th  | 95th  | 97th                               | 99th  | L      | S     | 1th   | 3th   | 5th   | 15th  | 25th  | 50th (M) | 75th  | 85th  | 95th  | 97th  | 99th  |
| 5           | -1.326                               | 0.133 | 9.49  | 9.91  | 10.15 | 10.83 | 11.30 | 12.30    | 13.53 | 14.32 | 15.92 | 16.66                              | 18.31 | -0.904 | 0.125 | 10.17 | 10.63 | 10.90 | 11.64 | 12.13 | 13.16    | 14.36 | 15.10 | 16.52 | 17.14 | 18.44 |
| 5.5         | -1.211                               | 0.12  | 10.43 | 10.86 | 11.11 | 11.81 | 12.27 | 13.26    | 14.43 | 15.16 | 16.60 | 17.24                              | 18.61 | -0.795 | 0.113 | 11.13 | 11.62 | 11.89 | 12.64 | 13.13 | 14.14    | 15.30 | 16.00 | 17.31 | 17.86 | 19.01 |
| 6           | -1.107                               | 0.113 | 11.14 | 11.59 | 11.85 | 12.57 | 13.04 | 14.03    | 15.20 | 15.91 | 17.29 | 17.89                              | 19.16 | -0.696 | 0.107 | 12.07 | 12.57 | 12.85 | 13.64 | 14.14 | 15.17    | 16.33 | 17.02 | 18.29 | 18.83 | 19.92 |
| 6.5         | -1.01                                | 0.115 | 11.60 | 12.09 | 12.36 | 13.13 | 13.64 | 14.70    | 15.93 | 16.68 | 18.12 | 18.75                              | 20.06 | -0.604 | 0.103 | 12.87 | 13.40 | 13.70 | 14.52 | 15.04 | 16.10    | 17.29 | 17.99 | 19.27 | 19.80 | 20.88 |
| 7           | -0.921                               | 0.122 | 11.98 | 12.52 | 12.82 | 13.68 | 14.25 | 15.43    | 16.81 | 17.65 | 19.27 | 19.98                              | 21.46 | -0.519 | 0.103 | 13.53 | 14.10 | 14.41 | 15.28 | 15.83 | 16.94    | 18.18 | 18.90 | 20.22 | 20.76 | 21.86 |
| 7.5         | -0.837                               | 0.133 | 12.36 | 12.97 | 13.31 | 14.28 | 14.92 | 16.27    | 17.86 | 18.84 | 20.72 | 21.54                              | 23.27 | -0.441 | 0.106 | 14.04 | 14.66 | 15.00 | 15.94 | 16.54 | 17.74    | 19.08 | 19.85 | 21.27 | 21.85 | 23.03 |
| 8           | -0.76                                | 0.143 | 12.77 | 13.45 | 13.84 | 14.93 | 15.65 | 17.18    | 18.99 | 20.11 | 22.26 | 23.21                              | 25.21 | -0.367 | 0.113 | 14.52 | 15.20 | 15.59 | 16.63 | 17.30 | 18.65    | 20.15 | 21.02 | 22.60 | 23.26 | 24.58 |
| 8.5         | -0.687                               | 0.151 | 13.26 | 14.02 | 14.44 | 15.66 | 16.46 | 18.16    | 20.18 | 21.42 | 23.83 | 24.89                              | 27.12 | -0.297 | 0.122 | 14.98 | 15.76 | 16.19 | 17.38 | 18.15 | 19.69    | 21.40 | 22.41 | 24.23 | 24.99 | 26.51 |
| 9           | -0.618                               | 0.157 | 13.84 | 14.67 | 15.14 | 16.47 | 17.36 | 19.23    | 21.46 | 22.83 | 25.47 | 26.64                              | 29.08 | -0.232 | 0.131 | 15.46 | 16.33 | 16.82 | 18.16 | 19.02 | 20.76    | 22.71 | 23.84 | 25.91 | 26.77 | 28.50 |
| 9.5         | -0.552                               | 0.163 | 14.47 | 15.38 | 15.90 | 17.37 | 18.35 | 20.42    | 22.87 | 24.38 | 27.29 | 28.57                              | 31.25 | -0.17  | 0.137 | 16.03 | 16.99 | 17.53 | 19.00 | 19.95 | 21.87    | 24.01 | 25.26 | 27.54 | 28.48 | 30.38 |
| 10          | -0.491                               | 0.17  | 15.15 | 16.15 | 16.73 | 18.35 | 19.43 | 21.72    | 24.43 | 26.10 | 29.32 | 30.72                              | 33.67 | -0.112 | 0.142 | 16.70 | 17.76 | 18.34 | 19.96 | 21.00 | 23.09    | 25.42 | 26.78 | 29.24 | 30.27 | 32.31 |
| 10.5        | -0.432                               | 0.175 | 15.89 | 17.00 | 17.63 | 19.43 | 20.62 | 23.14    | 26.13 | 27.96 | 31.49 | 33.03                              | 36.24 | -0.056 | 0.147 | 17.42 | 18.58 | 19.22 | 21.00 | 22.14 | 24.45    | 27.00 | 28.49 | 31.19 | 32.31 | 34.53 |
| 11          | -0.376                               | 0.178 | 16.79 | 18.00 | 18.69 | 20.64 | 21.94 | 24.67    | 27.90 | 29.88 | 33.65 | 35.30                              | 38.71 | -0.003 | 0.154 | 18.14 | 19.43 | 20.15 | 22.14 | 23.41 | 25.98    | 28.83 | 30.48 | 33.49 | 34.73 | 37.20 |
| 11.5        | -0.322                               | 0.176 | 17.89 | 19.19 | 19.93 | 22.02 | 23.40 | 26.29    | 29.68 | 31.74 | 35.64 | 37.33                              | 40.81 | 0.048  | 0.163 | 18.90 | 20.35 | 21.16 | 23.39 | 24.82 | 27.71    | 30.91 | 32.78 | 36.16 | 37.55 | 40.33 |
| 12          | -0.271                               | 0.169 | 19.20 | 20.57 | 21.35 | 23.53 | 24.96 | 27.93    | 31.37 | 33.44 | 37.32 | 38.98                              | 42.38 | 0.097  | 0.17  | 19.79 | 21.41 | 22.32 | 24.82 | 26.42 | 29.65    | 33.24 | 35.33 | 39.10 | 40.66 | 43.75 |
| 12.5        | -0.222                               | 0.16  | 20.62 | 22.03 | 22.83 | 25.05 | 26.50 | 29.48    | 32.88 | 34.91 | 38.66 | 40.25                              | 43.48 | 0.144  | 0.174 | 20.95 | 22.74 | 23.74 | 26.50 | 28.27 | 31.83    | 35.77 | 38.05 | 42.16 | 43.86 | 47.22 |
| 13          | -0.174                               | 0.15  | 22.00 | 23.44 | 24.24 | 26.47 | 27.91 | 30.86    | 34.17 | 36.12 | 39.69 | 41.19                              | 44.21 | 0.188  | 0.173 | 22.50 | 24.45 | 25.53 | 28.51 | 30.40 | 34.22    | 38.41 | 40.83 | 45.17 | 46.95 | 50.46 |
| 13.5        | -0.129                               | 0.14  | 23.27 | 24.71 | 25.51 | 27.73 | 29.15 | 32.02    | 35.21 | 37.08 | 40.46 | 41.87                              | 44.67 | 0.232  | 0.168 | 24.42 | 26.49 | 27.64 | 30.78 | 32.77 | 36.75    | 41.09 | 43.58 | 48.02 | 49.83 | 53.39 |
| 14          | -0.085                               | 0.132 | 24.36 | 25.79 | 26.59 | 28.78 | 30.17 | 32.97    | 36.05 | 37.83 | 41.03 | 42.36                              | 44.98 | 0.273  | 0.159 | 26.59 | 28.75 | 29.94 | 33.18 | 35.23 | 39.28    | 43.67 | 46.16 | 50.59 | 52.38 | 55.90 |
| 14.5        | -0.043                               | 0.125 | 25.23 | 26.67 | 27.46 | 29.63 | 31.00 | 33.73    | 36.71 | 38.43 | 41.50 | 42.76                              | 45.25 | 0.313  | 0.15  | 28.77 | 30.97 | 32.19 | 35.47 | 37.53 | 41.58    | 45.93 | 48.38 | 52.71 | 54.46 | 57.86 |
| 15          | -0.002                               | 0.121 | 25.90 | 27.34 | 28.13 | 30.28 | 31.64 | 34.34    | 37.27 | 38.94 | 41.92 | 43.14                              | 45.54 | 0.352  | 0.14  | 30.76 | 32.99 | 34.20 | 37.48 | 39.52 | 43.51    | 47.75 | 50.14 | 54.31 | 55.99 | 59.25 |
| 15.5        | 0.038                                | 0.119 | 26.37 | 27.82 | 28.62 | 30.79 | 32.15 | 34.84    | 37.75 | 39.41 | 42.35 | 43.55                              | 45.90 | 0.389  | 0.132 | 32.47 | 34.68 | 35.89 | 39.12 | 41.13 | 45.03    | 49.14 | 51.45 | 55.46 | 57.07 | 60.18 |
| 16          | 0.076                                | 0.119 | 26.67 | 28.15 | 28.96 | 31.16 | 32.54 | 35.26    | 38.19 | 39.85 | 42.80 | 44.00                              | 46.34 | 0.426  | 0.125 | 33.83 | 36.03 | 37.22 | 40.41 | 42.38 | 46.19    | 50.19 | 52.42 | 56.29 | 57.83 | 60.81 |
| 16.5        | 0.113                                | 0.12  | 26.82 | 28.33 | 29.16 | 31.41 | 32.81 | 35.58    | 38.56 | 40.25 | 43.23 | 44.44                              | 46.80 | 0.461  | 0.121 | 34.89 | 37.09 | 38.28 | 41.44 | 43.39 | 47.15    | 51.08 | 53.25 | 57.02 | 58.52 | 61.41 |
| 17          | 0.149                                | 0.121 | 26.84 | 28.40 | 29.25 | 31.55 | 32.99 | 35.83    | 38.87 | 40.59 | 43.62 | 44.85                              | 47.25 | 0.495  | 0.118 | 35.71 | 37.93 | 39.13 | 42.31 | 44.26 | 48.02    | 51.94 | 54.10 | 57.84 | 59.32 | 62.17 |
| 17.5        | 0.184                                | 0.124 | 26.77 | 28.37 | 29.24 | 31.61 | 33.08 | 35.99    | 39.10 | 40.86 | 43.95 | 45.21                              | 47.65 | 0.528  | 0.118 | 36.35 | 38.61 | 39.84 | 43.08 | 45.07 | 48.89    | 52.85 | 55.03 | 58.80 | 60.30 | 63.16 |
| 18          | 0.218                                | 0.126 | 26.62 | 28.26 | 29.16 | 31.59 | 33.10 | 36.08    | 39.26 | 41.05 | 44.22 | 45.49                              | 47.98 | 0.56   | 0.119 | 36.84 | 39.19 | 40.46 | 43.81 | 45.86 | 49.80    | 53.87 | 56.12 | 59.98 | 61.51 | 64.44 |

Supplementary figure 3. Body composition 3-C model by DXA at different Tanner puberal stages by sex.

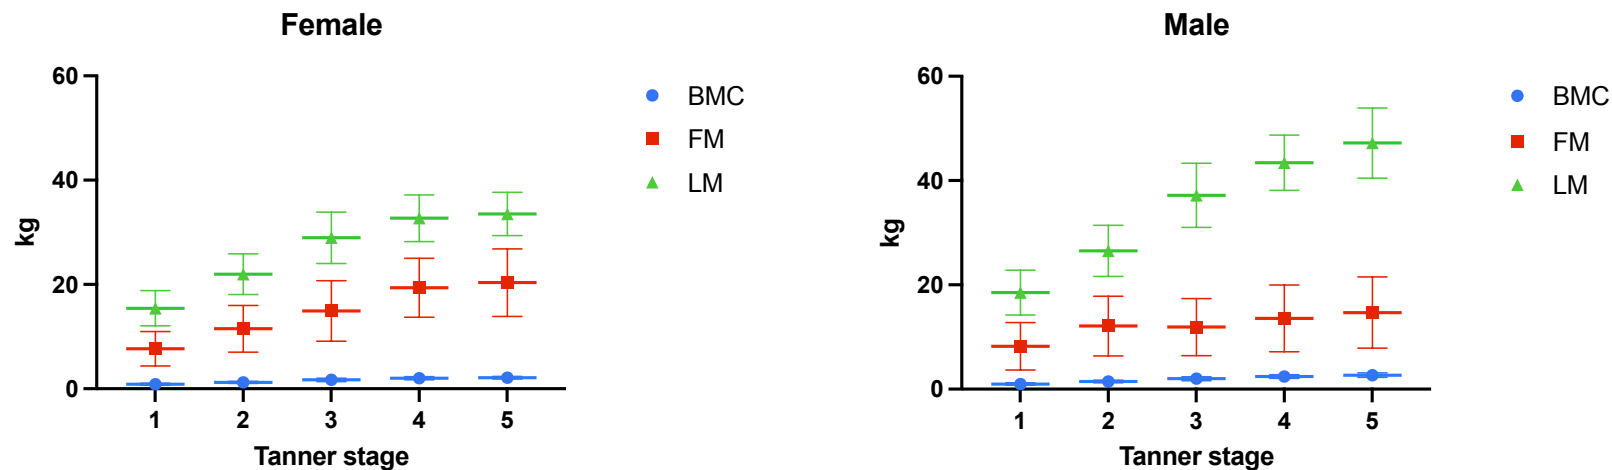

Supplementary figure 4. Comparison between the behavior of reference values for FM% by DXA published in other studies.

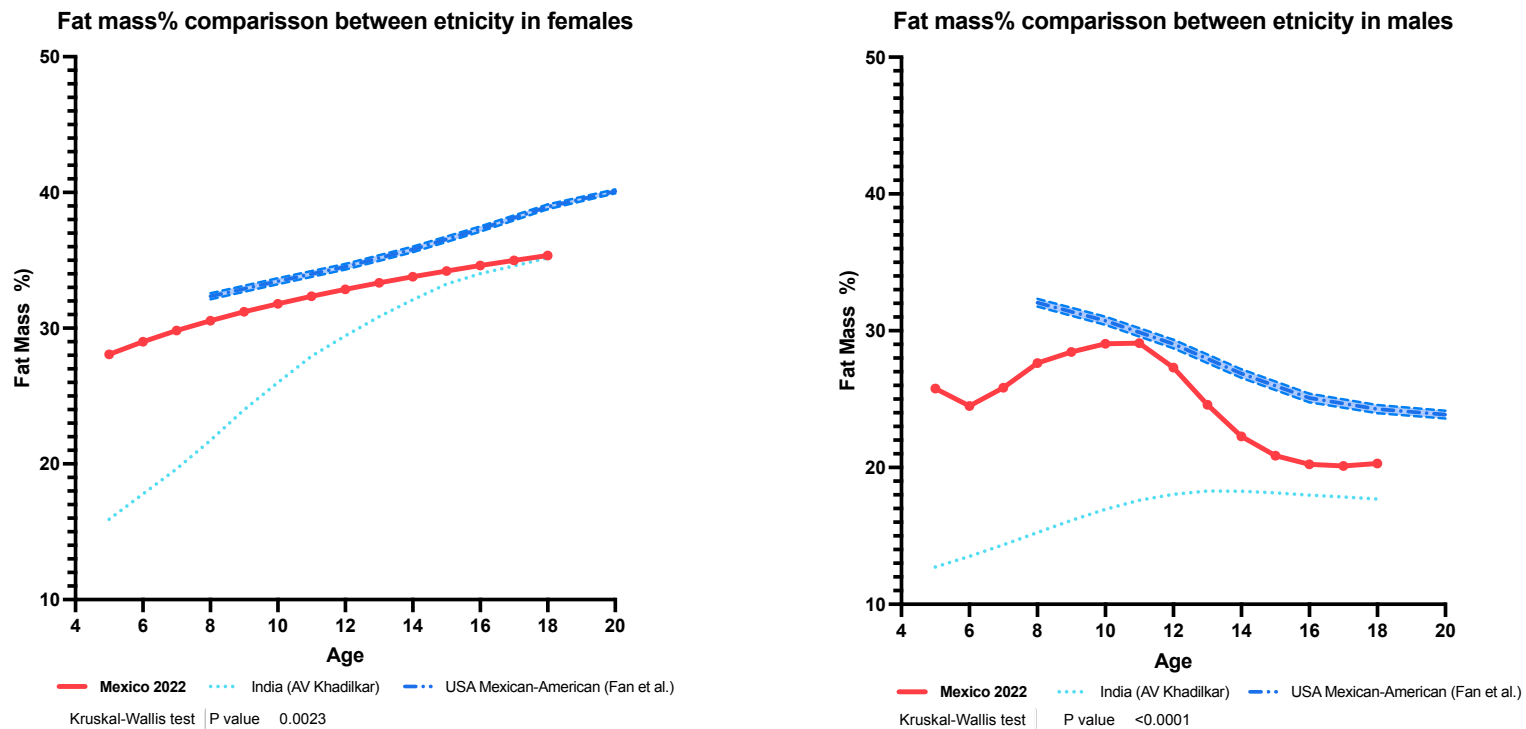

Supplement: 41430_2023_1352_MOESM1_ESM.pdf [file 41430_2023_1352_MOESM1_ESM.pdf]
